# Supplementary material for: Large-scale pancreatic cancer detection via non-contrast CT and deep learning
Source: PubMed Central journal article supplement (PMC10719100; doi:10.1038/s41591-023-02640-w), 2023-11-20
Supplement: 41591_2023_2640_MOESM1_ESM.pdf [file 41591_2023_2640_MOESM1_ESM.pdf]

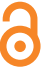

---

# Large-scale pancreatic cancer detection via non-contrast CT and deep learning

---

In the format provided by the authors and unedited

# Supplementary Information: Large-Scale Pancreatic Cancer Detection via Noncontrast CT and Deep Learning

Kai Cao<sup>1†</sup>, Yingda Xia<sup>2†</sup>, Jiawen Yao<sup>2,3†</sup>, Xu Han<sup>4†</sup>, Lukas Lambert<sup>5†</sup>, Tingting Zhang<sup>6†</sup>, Wei Tang<sup>7†</sup>, Gang Jin<sup>8</sup>, Hui Jiang<sup>9</sup>, Xu Fang<sup>1</sup>, Isabella Nogues<sup>10</sup>, Xuezhou Li<sup>1</sup>, Wenchao Guo<sup>2,3</sup>, Yu Wang<sup>2,3</sup>, Wei Fang<sup>2,3</sup>, Mingyan Qiu<sup>2,3</sup>, Yang Hou<sup>11</sup>, Tomas Kovarnik<sup>12</sup>, Michal Vocka<sup>13</sup>, Yimei Lu<sup>7</sup>, Yingli Chen<sup>8</sup>, Xin Chen<sup>14</sup>, Zaiyi Liu<sup>14</sup>, Jian Zhou<sup>15</sup>, Chuanmiao Xie<sup>15</sup>, Rong Zhang<sup>15</sup>, Hong Lu<sup>16</sup>, Gregory D. Hager<sup>17</sup>, Alan L. Yuille<sup>17</sup>, Le Lu<sup>2</sup>, Chengwei Shao<sup>1\*</sup>, Yu Shi<sup>11\*</sup>, Qi Zhang<sup>4\*</sup>, Tingbo Liang<sup>4\*</sup>, Ling Zhang<sup>2\*</sup> and Jianping Lu<sup>1\*</sup>

<sup>1</sup>Department of Radiology, Shanghai Institution of Pancreatic Diseases, China.

<sup>2</sup>DAMO Academy, Alibaba Group.

<sup>3</sup>Hupan Lab, Hangzhou, China.

<sup>4</sup>Department of Hepatobiliary and Pancreatic Surgery, the First Affiliated Hospital of Zhejiang University, China.

<sup>5</sup>Department of Radiology, First Faculty of Medicine, Charles University and General University Hospital in Prague, Czech Republic.

<sup>6</sup>Department of Radiology, Xinhua Hospital, Shanghai Jiao Tong University School of Medicine, China.

<sup>7</sup>Department of Radiology, Fudan University Shanghai Cancer Center, China.

<sup>8</sup>Department of Surgery, Shanghai Institution of Pancreatic Diseases, China.

<sup>9</sup>Department of Pathology, Shanghai Institution of Pancreatic Diseases, China.

<sup>10</sup>Departments of Biostatistics, Harvard University T.H. Chan School of Public Health, USA.

- <sup>11</sup>Department of Radiology, Shengjing Hospital of China Medical University, China.
- <sup>12</sup>Department of Invasive Cardiology, First Faculty of Medicine, Charles University and General University Hospital in Prague, Czech Republic.
- <sup>13</sup>Department of Oncology, First Faculty of Medicine, Charles University and General University Hospital in Prague, Czech Republic.
- <sup>14</sup>Department of Radiology, Guangdong Provincial People's Hospital, China.
- <sup>15</sup>Department of Radiology, Sun Yat-sen University Cancer Center, China.
- <sup>16</sup>Department of Radiology, Tianjin Medical University Cancer Institute and Hospital, China.
- <sup>17</sup>Department of Computer Science, Johns Hopkins University, USA.

\*Corresponding author(s). E-mail(s): [cwshao@sina.com](mailto:cwshao@sina.com);  
[18940259980@163.com](mailto:18940259980@163.com); [qi.zhang@zju.edu.cn](mailto:qi.zhang@zju.edu.cn);  
[liangtingbo@zju.edu.cn](mailto:liangtingbo@zju.edu.cn); [ling.z@alibaba-inc.com](mailto:ling.z@alibaba-inc.com);  
[cjr.lujianping@vip.163.com](mailto:cjr.lujianping@vip.163.com);

†These authors contributed equally to this work.

# Contents

|          |                                                                               |          |
|----------|-------------------------------------------------------------------------------|----------|
| <b>1</b> | <b>Supplementary Methods</b>                                                  | <b>6</b> |
| 1.1      | Supplementary dataset description . . . . .                                   | 6        |
| 1.1.1    | Normal control collection . . . . .                                           | 6        |
| 1.1.2    | Internal training cohort . . . . .                                            | 6        |
| 1.1.3    | Lesion and pancreas annotation . . . . .                                      | 6        |
| 1.1.4    | Internal test and differential diagnosis cohorts . . . . .                    | 7        |
| 1.1.5    | External multicenter test cohorts . . . . .                                   | 8        |
| 1.1.6    | Chest CT test cohort . . . . .                                                | 8        |
| 1.1.7    | Real-world cohorts . . . . .                                                  | 9        |
| 1.2      | PANDA training, inference, deployment, and evolution . . . . .                | 10       |
| 1.2.1    | PANDA Stage-1 . . . . .                                                       | 10       |
| 1.2.2    | PANDA Stage-2 . . . . .                                                       | 10       |
| 1.2.3    | PANDA Stage-3 . . . . .                                                       | 10       |
| 1.2.4    | Real-world deployment . . . . .                                               | 11       |
| 1.2.5    | PANDA Plus . . . . .                                                          | 11       |
| 1.3      | Reader studies . . . . .                                                      | 12       |
| 1.3.1    | Individual differences between noncontrast and contrast-enhanced CT . . . . . | 12       |
| 1.4      | Use PANDA for screening in high-risk populations . . . . .                    | 12       |

## List of Figures

|    |                                                                                                                            |    |
|----|----------------------------------------------------------------------------------------------------------------------------|----|
| 1  | Differential diagnosis performance of the second-reader radiology report . . . . .                                         | 14 |
| 2  | Reader study of 33 readers for primary diagnosis . . . . .                                                                 | 15 |
| 3  | Examples of the format of PANDA predictions to the readers . . . . .                                                       | 16 |
| 4  | Reader study of 33 readers with AI assistance for primary diagnosis . . . . .                                              | 17 |
| 5  | Reader study of 15 readers for primary diagnosis . . . . .                                                                 | 18 |
| 6  | Differential diagnosis with PANDA on external test cohorts . . . . .                                                       | 19 |
| 7  | Confusion matrix of the full pipeline . . . . .                                                                            | 20 |
| 8  | Examples of PANDA's (peri-)pancreatic disease findings in the real-world clinical evaluation . . . . .                     | 21 |
| 9  | Flowchart describing the process of the seamless integration of PANDA into the existing clinical infrastructures . . . . . | 22 |
| 10 | Flowchart describing the test process of patients of RW1 . . . . .                                                         | 23 |
| 11 | Flowchart describing the test process from the physical exam centers of RW1 . . . . .                                      | 24 |
| 12 | Flowchart describing the test process from the emergency department of RW1 . . . . .                                       | 25 |
| 13 | Flowchart describing the test process of outpatients of RW1 . . . . .                                                      | 26 |
| 14 | Flowchart describing the test process of inpatients of RW1 . . . . .                                                       | 27 |
| 15 | Flowchart describing the test process of patients of RW2 . . . . .                                                         | 28 |
| 16 | Flowchart describing the test process from the physical exam centers of RW2 . . . . .                                      | 29 |
| 17 | Flowchart describing the test process from the emergency department of RW2 . . . . .                                       | 30 |
| 18 | Flowchart describing the test process of outpatients of RW2 . . . . .                                                      | 31 |
| 19 | Flowchart describing the test process of inpatients of RW2 . . . . .                                                       | 32 |
| 20 | Model evolution . . . . .                                                                                                  | 33 |

## List of Tables

|    |                                                                                                                       |    |
|----|-----------------------------------------------------------------------------------------------------------------------|----|
| 1  | List of subtypes included in nonPDAC ‘other’ . . . . .                                                                | 34 |
| 2  | Supplementary data characteristics of reference standard of lesion types . . . . .                                    | 35 |
| 3  | Supplementary data characteristics of lesion size (diameter) stratified by lesion type . . . . .                      | 36 |
| 4  | Comparison between PANDA and second-reader radiology report (contrast CT) performance on differential diagnosis . . . | 37 |
| 5  | Segmentation performance of PANDA on the internal test cohort                                                         | 38 |
| 6  | Reader (noncontrast CT) vs. PANDA (noncontrast CT) by sensitivity and specificity . . . . .                           | 39 |
| 7  | The impact of PANDA assistance on reader performance on noncontrast CT by sensitivity and specificity . . . . .       | 40 |
| 8  | Reader (noncontrast CT) vs. PANDA (noncontrast CT) by accuracy and balanced accuracy . . . . .                        | 41 |
| 9  | The impact of PANDA assistance on reader performance on noncontrast CT by accuracy and balanced accuracy . . . . .    | 42 |
| 10 | Reader(contrast-enhanced CT) vs. PANDA (noncontrast CT) by sensitivity and specificity . . . . .                      | 43 |
| 11 | Reader (contrast-enhanced CT) vs. PANDA (noncontrast CT) by accuracy and balanced accuracy . . . . .                  | 44 |
| 12 | Differential diagnosis results on four external centers with pathologically confirmed PDAC and nonPDAC . . . . .      | 44 |
| 13 | Results for IPMN subtype classification . . . . .                                                                     | 45 |
| 14 | Analysis of PANDA’s false positive predictions in real-world evaluation RW1 and RW2 . . . . .                         | 45 |

# 1 Supplementary Methods

## 1.1 Supplementary dataset description

### 1.1.1 Normal control collection

The patient label of the surgical pathology was determined based on the 2019 WHO classification of tumors (5th edition) of the digestive system. For biopsy pathology, definitive evidence was required for diagnosis. Patients with mixed neoplasms were not included.

We collected normal controls based on the following approach: First, we searched patients whose radiology report of abdominal contrast-enhanced CT had negative pancreatic findings; Then, among these patients, we searched patients who had a record of at least 2-year follow-up and no information in their available clinical diagnosis indicated a pancreatic lesion. Because the centers in our studies are all (or directly affiliated to) tertiary or general academic hospitals, the indication of normal control patients to perform the first CT scan includes various purposes, such as abdominal pain, abnormal blood biomarkers, tumor (other than pancreatic tumor) diagnosis, etc.

### 1.1.2 Internal training cohort

The pathologist (15 years of specialized experience in pancreatic pathology) and the radiologist (17 years of experience in pancreatic radiology) in our team reviewed the surgical pathology records and contrast-enhanced CT images to determine the ground-truth of IPMN subtypes, i.e., main/mixed-duct or branch-duct IPMN. Among the branch-duct IPMNs, the indication of surgery is one of the following characteristics being observed: growth rate  $\geq 5$  mm per year; increased levels of serum CA19-9; acute pancreatitis (caused by IPMN); cyst diameter  $\geq 50$  mm; jaundice (tumor-related). The radiologist in our team reviewed the multi-phase contrast-enhanced CT of the IPMN cases as per revised Fukuoka guidelines for IPMN management [1] and observed 154 cases with high-risk stigmata, 94 cases with worrisome features (if no high-risk stigmata were observed), and 6 cases with neither. Normal controls confirmed by at least 2 years of follow-up were randomly selected from the same time period. All cases had preoperative multi-phase contrast-enhanced CT images acquired by Philips, Siemens, Toshiba/Canon, or Vital scanners.

### 1.1.3 Lesion and pancreas annotation

**Lesion.** First, we set the arterial phase as the target phase and registered all the other phases (noncontrast and venous) to the arterial phase using DEEDS [2] image registration algorithm. On the registered images, an experienced radiologist (with 15 years of experience in pancreatic imaging) manually annotated voxel-wise segmentation masks of the pancreatic lesions for all patients on either the arterial or venous phase with better lesion visibility using ITK-SNAP software [3]. During annotation, the radiologist also referred

to all the other CT phases, radiology report, contrast-enhanced MRI, surgical report, and pathology report if necessary. Then, We registered the image (either arterial or venous phase) with radiologist’s lesion annotation back to the noncontrast phase using the DEEDS algorithm [2] and applied the registration deformation field to the annotated mask so that we obtained the deformed lesion mask for the original noncontrast image. Our preliminary experiments found that training PANDA on the original noncontrast images with deformed lesion masks had better performance than training on the deformed noncontrast images with original lesion masks. Finally, the deformed lesion masks on the noncontrast images were verified and edited by the radiologist to avoid obvious registration displacements. The radiologists did not directly annotate the tumor on the noncontrast CT because they found it extremely difficult as lesion boundaries are almost invisible and hard to define (especially for PDAC), even when referring to contrast-enhanced CT images. Another benefit of using the registration technique as a starting point is that the size (in volume) of the annotated lesion can be consistent with the one that appeared in the contrast-enhanced CT.

**Pancreas.** We used our recently developed pancreas segmentation model for three-phase (noncontrast, arterial, and venous) registered CT images [4] to segment the pancreas in the internal training cohort. We empirically found that such a three-phase-based segmentation model was more robust than any single-phase-based model for pancreas segmentation. The model could segment PDAC and nine anatomies, including the pancreas, pancreatic duct, and peri-pancreatic anatomies (duodenum, aorta, inferior vena cava [IVC], portal vein and splenic vein [PVSV], superior mesenteric vein [SMV], superior mesenteric artery [SMA], and truncus coeliacus [TC]). The segmented masks were post-processed by two steps: (1) change all PDAC masks to pancreas masks, as we had manual PDAC masks; and (2) remove all pancreatic duct masks in the nonPDAC and normal cases, as this yielded higher specificity for lesion detection in preliminary experiments. Then, to obtain the pseudo masks of the pancreas and duct for the original noncontrast phase image, we registered the arterial phase image to the noncontrast phase image in the internal training cohort and applied the registration deformation field to the post-processed masks. The final pancreas mask on the noncontrast image was further verified and edited by an experienced engineer (on the training cohort) or the radiologist (on the internal test cohort) to avoid obvious errors. Finally, the pancreatic lesion manual masks were overlaid on the pancreas and duct masks. The training of our AI model utilized the original noncontrast phase CT images and the voxel-wise masks of the pancreas, pancreatic duct (only in PDAC cases), and lesion.

#### 1.1.4 Internal test and differential diagnosis cohorts

As per revised Fukuoka guidelines [1] for IPMN management, 51 cases had high-risk stigmata, 35 cases had worrisome features if no high-risk stigmata



were observed, and 1 case with neither among the IPMN cases in internal differential diagnosis cohort (n=87).

### 1.1.5 External multicenter test cohorts

For the IPMNs in the external validation cohorts (n=172), due to the difficulty of retrieving and re-evaluating pathology records/images, the ground-truth of IPMN subtype was based on radiology evaluation by a radiologist in our team (17 years of specialized experience in diagnostic pancreatic imaging) by reviewing the multi-phase contrast-enhanced CT images [5]), which led to 82 main/mixed-duct IPMN and 90 branch-duct IPMN. As per revised Fukuoka guidelines [1], 101 cases had high-risk stigmata, 70 cases had worrisome features if no high-risk stigmata were observed, and 1 case with neither.

**Site A.** SHCMU, is a tertiary hospital in China. We consecutively collected 1,023 patients with PDAC and 251 patients with nonPDAC, and randomly selected 495 normal controls from January 2010 to May 2020.

**Site B.** FAHZU, is a tertiary hospital in China. We consecutively collected 983 patients with PDAC and 523 patients with nonPDAC from May 2020 to July 2022, and randomly collected 513 normal controls from Dec 1 2021 to Dec 31 2021.

**Site C.** XH, is a tertiary hospital in China. We consecutively collected 115 patients with PDAC and 61 patients with nonPDAC, and randomly selected 194 normal controls from January 2019 to December 2020.

**Site D.** FUSCC, is a tertiary hospital in China. We collected 157 PDAC, 97 nonPDAC, and 38 normal controls from November 2016 to November 2020.

**Site E.** TMUCIH, is a tertiary hospital in China. We collected 60 patients with PDAC from January 2010 and November 2019.

**Site F.** SYUCC, is a tertiary hospital in China. We consecutively collected 173 patients with PDAC from March 2010 to April 2020.

**Site G.** GPPH, is a tertiary hospital in China. We collected 43 patients with PDAC and randomly selected 49 normal controls from January 2011 and August 2015.

**Site H.** CGMH, is a hospital in Taiwan, ROC. Doctors from CGMH consecutively collected 90 patients with PDAC and randomly selected 292 normal controls from March 2009 to November 2015. We deployed and run PANDA using the NVIDIA-docker container (version 2.0, <https://github.com/NVIDIA/nvidia-docker>) in a local workstation in CGMH.

**Site I.** GUHP, is a hospital in the Czech Republic. We consecutively collected 93 patients with PDAC and randomly selected 87 normal controls from August 2005 to March 2022.

### 1.1.6 Chest CT test cohort

Chest CT scans are obtained with patients in the supine position and with the thorax centered within the gantry and both arms elevated. The respiration phase is inspiration via a single breath-hold. The scan extent ranges from the

lung species to the bottom. Radiology technicians need to perform a CT localizer scan before determining the scanning range. Usually, relying solely on a single position's localizer image, such as the anterior-posterior view, may not accurately determine the scanning position of the lower lung border. Therefore, in our routine chest CT scanning protocol, a lateral view is commonly added better to determine the scanning position of the lower lung border. This often results in the scanning range of the chest CT covering a portion of the abdominal organs, such as the liver, spleen, kidneys, and pancreas. The X-ray tube voltage is 120kV, and the tube current ranges from 137–380 mA. Each case has a field of view (FOV) ranging from 300mm to 418mm, slice thickness of 1mm and 5mm, and is reconstructed using both lung and soft-tissue kernels. In this study, PANDA was run on the chest CT scans with a slice thickness of 5mm reconstructed via soft-tissue kernel.

### 1.1.7 Real-world cohorts

The standard of truth of all patients was determined as follows. First, two radiologists analyzed electronic medical records (EMRs) to determine the SOC clinical diagnosis. Then, unspecified cases were determined by a multidisciplinary team (MDT) reviewing the clinical, imaging, and pathology data. (Extended Data Fig. 5, Extended Data Fig. 6). Patients with AI-detected pancreatic lesions that were previously not reported by the SOC will be reviewed (and contacted if necessary) by the MDT. The lesions with potential malignancies or undetermined types were invited to undergo a magnetic resonance imaging (MRI) scan with contrast. To reduce the double standard of truth bias in the above described process, we randomly sampled 1% ( $n=200$ ) of the negative cases that both SOC and AI reported negative. The CT images and EMRs of these cases were further reviewed by the two radiologists, and all cases were confirmed to be negative.

Our real-world data was collected from four scenarios. The physical examination center is indicated for routine check-ups, such as annual checkups. In this scenario, noncontrast CT scans, e.g., chest noncontrast CT scans for lung nodule screening or coronary artery calcium scoring, are usually performed, which can be used for the incidental detection of pancreatic cancer. The emergency department is the emergency room (ER) in the hospital, equipped with imaging devices (noncontrast CT is commonly used) to offer a timely assessment of patients with acute diseases. The outpatient department provides hospital care without being hospitalized or for a stay of less than 24 hours. Outpatient services encompass a wide range of diagnoses, treatments, or follow-ups of various conditions. The inpatient department provides medical treatment to patients who are admitted to a hospital and require an overnight stay or longer-term care. Inpatients typically have more severe illnesses and complex medical conditions. Inpatient care involves multidisciplinary teams of healthcare professionals working together to provide comprehensive management and treatment. In the latter two scenarios, i.e., outpatient and inpatient,

most of our collected CT scans were the noncontrast phase of the multi-phase contrast-enhanced CT scans.

## 1.2 PANDA training, inference, deployment, and evolution

### 1.2.1 PANDA Stage-1

Each image is first resampled to the spacing of (1.09mm, 1.09mm, 3mm) in (x, y, z) dimension. The network has 12 consecutive CNN blocks with skip connections and takes the input of a patch size (224, 192, 56). We train the network with deep supervision, SGD optimizer, an initialized learning rate of  $1 \times 10^{-2}$ , and polynomial learning rate decay for 250,000 iterations. In the inference phase of this stage, we first forward the whole noncontrast CT to obtain the whole pancreas mask. Then, we keep the largest connected component and crop the foreground bounding box of the whole pancreatic region, which will be used as the input of the next stages.

### 1.2.2 PANDA Stage-2

In the training phase, we first pre-train the segmentation UNet backbone for 250,000 iterations only supervised by the masks of lesion and pancreas, and then finetune jointly with the classification branch for another 250,000 iterations with SGD optimizer, polynomial learning rate decay, and an initial learning rate  $1 \times 10^{-3}$ . The initial learning rate of the nnUNet backbone was set to be one-tenth of the classification branch in the finetune stage, i.e.,  $1 \times 10^{-4}$ . We trained five-fold cross-validation on the training cohort (n=3,208), resulting in five models. For the operating point selection, the probability cut-off was tuned to achieve a specificity of 99% on the five validation sets in the cross-validation. As such, the cross-validated results on the training cohort of 3208 cases were 0.993 in AUC, 95.1% in sensitivity, and 99.0% in specificity. In the inference phase, the classification probability and the segmentation were produced by an ensemble of the five different models with the pre-selected cut-off for further binary prediction.

### 1.2.3 PANDA Stage-3

Formally, we describe the mechanism of the cross-attention and self-attention layers as follows. Given a 3D feature map  $\mathbf{x}^c \in \mathbb{R}^{H_0 \times W_0 \times D_0 \times d_0}$  of the UNet branch with the shape of  $(H_0, W_0, D_0)$  and  $d_0$  channels, we first trilinearly interpolate  $\mathbf{x}^c$  into a fixed shape  $(H, W, D)$  and linearly project it to  $d$  dimension to relieve the computational burden that could be caused by the computation over the large 3D feature map. We then flatten it into 1D features of a length of  $\hat{N} = H \times W \times D$  and add a learnable positional embedding  $\mathbf{x}_{pos} \in \mathbb{R}^{\hat{N} \times d}$  shared among each layer. The resulted 1D features are denoted as  $\hat{\mathbf{x}}^c \in \mathbb{R}^{\hat{N} \times d}$ . The 1D global memory feature  $\mathbf{x}^m \in \mathbb{R}^{N \times d}$  has a length of  $N$ . We compute the the memory-branch query vectors  $\mathbf{q}^m \in \mathbb{R}^{N \times d}$ , key vectors

$\mathbf{k}^m \in \mathbb{R}^{N \times d}$ , and value vectors  $\mathbf{v}^m \in \mathbb{R}^{N \times d}$  by forwarding  $\mathbf{x}^m$  into three linear projection layers, and compute the key vectors  $\mathbf{k}^c \in \mathbb{R}^{N \times d}$  and value vectors  $\mathbf{v}^c \in \mathbb{R}^{N \times d}$  based on  $\hat{\mathbf{x}}^c$  similarly. We concatenate the key vectors and the value vectors as  $\mathbf{k}^{cm} = [\mathbf{k}^c \mathbf{k}^m]$  and  $\mathbf{v}^{cm} = [\mathbf{v}^c \mathbf{v}^m]$ , respectively. Finally, the output of the combined cross-attention and self-attention layer  $\mathbf{y}^m \in \mathbb{R}^{N \times d}$  is computed as

$$\mathbf{y}^m = \text{softmax}\left(\frac{\mathbf{q}^m (\mathbf{k}^{cm})^T}{\sqrt{d}}\right) \mathbf{v}_n^{cm} \quad (1)$$

where *softmax* denotes the softmax function used to regularize each row of the attention matrix. Two standard multilayer perceptron (MLP) layers are followed to increase the computational complexity.

We set  $(H, W, D) = (5, 8, 5)$ ,  $d = 320$ , and  $N = \hat{N} = 200$ . After four-level computation, we select the memory responses via mean pooling of  $N$  memory features and build a classifier to output the probability of each subclass. This network is also supervised by a joint segmentation and classification loss described in Methods Eq.1 with a modification of 8-class cross-entropy loss instead of 2-class. Similar to Stage-2, the UNet branch is also pre-trained for 250,000 iterations and then trained jointly with the memory branch for another 250,000 iterations. We use RAdam optimizer and cosine learning rate decay with an initial learning rate  $1 \times 10^{-3}$ . Same as Stage-2, we train the Stage-3 model via five-fold cross-validation on the training set. In the inference phase, we also ensemble the predictions of the five models to produce the final results.

We trained the IPMN subtype classifier with the same network architecture of our Stage-3 model on the IPMN cases in the internal training cohort, where the parameters of the network were initialized from PANDA Stage-3 network and tuned for 25,000 iterations with the rest of the hyper-parameters unchanged.

### 1.2.4 Real-world deployment

When conducting the real-world study, CT scans within the specified time period were automatically collected. This can be done by checking radiology information system (RIS) records and then transferring those data from the picture archiving and communication system (PACS) to the local server. From each patient’s CT DICOM sequences, the required chest or abdominal noncontrast CT scan was automatically selected according to both DICOM tags (e.g., body part, thickness, convolution kernel) and RIS records (e.g., study description, such as chest noncontrast CT). Then we run the PANDA model on the noncontrast CT scan. Both detection and diagnosis results (Excel tables) are transferred and stored in the RIS client.

### 1.2.5 PANDA Plus

The training set of the “PANDA Plus” model included 3,208 cases from the internal training cohort of PANDA, 275 cases from the multicenter cohort (20

normal, 99 PDAC, 72 PNET, 6 SPT, 15 IPMN, 6 MCN, 13 CP, 23 SCN, and 21 ‘other’), and 147 cases (62 normal, 1 PNET, 1 CP, 25 ‘other’, and 58 AP) from the real-world cohort 1 (Supplementary Fig. 20). The cases from the multicenter cohort and the real-world cohort 1 were either false positive or false negative predictions of the original PANDA model. For the annotation of the new cases, the same expert radiologist annotated the lesion directly on the noncontrast CT scan, referring to all existing clinical examinations and records, e.g., multi-phase contrast-enhanced CTs, EMRs, and pathology reports. The pancreas segmentation mask was annotated by the original PANDA model. With these extra training data, we finetuned the original PANDA Stage-2 and Stage-3 model (only trained on the internal training cohort) with both the internal training data and the newly collected data for another 250,000 iterations, using the same training hyperparameters as original. In the training process, we oversampled the newly collected CT data by a frequency factor of 5, forcing the AI model to see the challenging data (the false positives and false negatives) and the new categorical data (acute pancreatitis) more frequently. In machine learning, these taxonomies are known as hard example mining and incremental learning, respectively. The evolved model was named PANDA Plus and tested on the second real-world study (RW2).

### 1.3 Reader studies

#### 1.3.1 Individual differences between noncontrast and contrast-enhanced CT

In the reader studies, we avoided the overlap of the readers between the non-contrast study and the contrast-enhanced study. Because we aimed to measure the individual performances of the readers either on noncontrast or contrast-enhanced CT, while the simultaneous examinations had the possibility of mutual interference. To analyze the individual differences between noncontrast CT and contrast-enhanced CT, four pancreas specialists (S12, S14, S17, and S21) additionally reviewed the noncontrast CT after a long wash-out period (about one year). We found that almost all readers’ performance (sensitivity and specificity) in contrast-enhanced CT is superior to their performance in noncontrast CT. In addition, their average performance on the noncontrast CT (85.1% and 96.6%) is similar to the average of the other 11 specialists in the first reader study (82.0% and 96.9%), and interestingly, their average performance on contrast-enhanced CT (89.7% and 98.5%) is similar to the average of the other 11 specialists with AI assistance on noncontrast CT (89.5% and 98.7%).

### 1.4 Use PANDA for screening in high-risk populations

On the other hand, PANDA could also be used in designed screening in high-risk populations. Given the assumed sensitivity (93%) and specificity (99.9%) of PANDA in PDAC identification, null sensitivity and specificity of 50%, and a prevalence of pancreatic cancer among high-risk new-onset diabetes subjects

aged  $\geq 50$  years of 0.8% [6], we calculated the number of people needed to screen is 1,500 to achieve a statistical power of 90%. The calculation of people needed to screen in the high-risk population was based on Test for One-Sample Sensitivity and Specificity via PASS software (version 15).

|               | 94.1% (427/454) | 67.2% (41/61) | 71.8% (28/39) | 75.8% (75/99) | 63.2% (12/19) | 60.8% (20/33) | 72.0% (18/25) | 10.7% (6/56) |                 |
|---------------|-----------------|---------------|---------------|---------------|---------------|---------------|---------------|--------------|-----------------|
| PDAC (475) –  | 427             | 5             | 2             | 7             | 0             | 8             | 0             | 26           | 89.9% (427/475) |
| PNET (58) –   | 7               | 41            | 2             | 2             | 0             | 0             | 0             | 6            | 70.7% (41/58)   |
| SPT (39) –    | 4               | 2             | 28            | 1             | 2             | 0             | 1             | 1            | 71.8% (28/39)   |
| IPMN (87) –   | 2               | 0             | 0             | 75            | 1             | 3             | 3             | 3            | 86.2% (75/87)   |
| MCN (23) –    | 0               | 0             | 2             | 3             | 12            | 0             | 2             | 4            | 52.2% (12/23)   |
| CP (45) –     | 8               | 2             | 0             | 5             | 0             | 20            | 1             | 9            | 44.4% (20/45)   |
| SCN (29) –    | 1               | 0             | 1             | 4             | 3             | 1             | 18            | 1            | 62.1% (18/29)   |
| Others (30) – | 5               | 11            | 4             | 2             | 1             | 1             | 0             | 6            | 20.0% (6/30)    |
|               | PDAC (454)      | PNET (61)     | SPT (39)      | IPMN (99)     | MCN (19)      | CP (33)       | SCN (25)      | Others (56)  |                 |

**Supplementary Figure 1:** Differential diagnosis performance of the second-reader radiology report in the internal differential diagnosis cohort, where comprehensive clinical information and imaging (including contrast-enhanced CT or MRI) are used.

|                                                                                                                                                                                                                                                                                                         |              |              |            |            |            |            |          |          |              |           |              |              |                                                                                                                                                                                                                                                                                                         |            |            |             |            |            |             |          |           |              |            |              |              |                                                                                                                                                                                                                                                                                                         |            |            |             |            |            |            |           |          |              |           |              |              |                                                                                                                                                                                                                                                                                                        |            |            |            |            |            |            |           |          |              |            |              |              |                                                                                                                                                                                                                                                                                                          |            |            |             |            |            |              |          |            |              |            |              |              |
|---------------------------------------------------------------------------------------------------------------------------------------------------------------------------------------------------------------------------------------------------------------------------------------------------------|--------------|--------------|------------|------------|------------|------------|----------|----------|--------------|-----------|--------------|--------------|---------------------------------------------------------------------------------------------------------------------------------------------------------------------------------------------------------------------------------------------------------------------------------------------------------|------------|------------|-------------|------------|------------|-------------|----------|-----------|--------------|------------|--------------|--------------|---------------------------------------------------------------------------------------------------------------------------------------------------------------------------------------------------------------------------------------------------------------------------------------------------------|------------|------------|-------------|------------|------------|------------|-----------|----------|--------------|-----------|--------------|--------------|--------------------------------------------------------------------------------------------------------------------------------------------------------------------------------------------------------------------------------------------------------------------------------------------------------|------------|------------|------------|------------|------------|------------|-----------|----------|--------------|------------|--------------|--------------|----------------------------------------------------------------------------------------------------------------------------------------------------------------------------------------------------------------------------------------------------------------------------------------------------------|------------|------------|-------------|------------|------------|--------------|----------|------------|--------------|------------|--------------|--------------|
| <table border="1"> <tr><td>49 (65.4%)</td><td>11 (14.6%)</td><td>18 (24.0%)</td></tr> <tr><td>21 (27.3%)</td><td>31 (40.3%)</td><td>15 (19.7%)</td></tr> <tr><td>0 (0.0%)</td><td>0 (0.0%)</td><td>116 (153.3%)</td></tr> <tr><td>PDAC (70)</td><td>NoPDAC (42)</td><td>Normal (178)</td></tr> </table> | 49 (65.4%)   | 11 (14.6%)   | 18 (24.0%) | 21 (27.3%) | 31 (40.3%) | 15 (19.7%) | 0 (0.0%) | 0 (0.0%) | 116 (153.3%) | PDAC (70) | NoPDAC (42)  | Normal (178) | <table border="1"> <tr><td>77 (71.3%)</td><td>11 (10.2%)</td><td>20 (18.5%)</td></tr> <tr><td>19 (28.4%)</td><td>27 (39.7%)</td><td>11 (16.4%)</td></tr> <tr><td>8 (8.0%)</td><td>6 (5.2%)</td><td>102 (97.8%)</td></tr> <tr><td>PDAC (104)</td><td>NoPDAC (54)</td><td>Normal (133)</td></tr> </table> | 77 (71.3%) | 11 (10.2%) | 20 (18.5%)  | 19 (28.4%) | 27 (39.7%) | 11 (16.4%)  | 8 (8.0%) | 6 (5.2%)  | 102 (97.8%)  | PDAC (104) | NoPDAC (54)  | Normal (133) | <table border="1"> <tr><td>40 (17.4%)</td><td>35 (15.4%)</td><td>11 (4.8%)</td></tr> <tr><td>10 (4.6%)</td><td>49 (21.3%)</td><td>8 (3.5%)</td></tr> <tr><td>2 (0.9%)</td><td>6 (2.7%)</td><td>106 (47.1%)</td></tr> <tr><td>PDAC (14)</td><td>NoPDAC (96)</td><td>Normal (127)</td></tr> </table>      | 40 (17.4%) | 35 (15.4%) | 11 (4.8%)   | 10 (4.6%)  | 49 (21.3%) | 8 (3.5%)   | 2 (0.9%)  | 6 (2.7%) | 106 (47.1%)  | PDAC (14) | NoPDAC (96)  | Normal (127) | <table border="1"> <tr><td>92 (85.2%)</td><td>6 (5.6%)</td><td>11 (10.2%)</td></tr> <tr><td>9 (8.4%)</td><td>48 (44.4%)</td><td>10 (9.3%)</td></tr> <tr><td>1 (0.9%)</td><td>1 (0.9%)</td><td>114 (105.3%)</td></tr> <tr><td>PDAC (102)</td><td>NoPDAC (64)</td><td>Normal (135)</td></tr> </table>    | 92 (85.2%) | 6 (5.6%)   | 11 (10.2%) | 9 (8.4%)   | 48 (44.4%) | 10 (9.3%)  | 1 (0.9%)  | 1 (0.9%) | 114 (105.3%) | PDAC (102) | NoPDAC (64)  | Normal (135) | <table border="1"> <tr><td>70 (64.8%)</td><td>18 (16.7%)</td><td>29 (26.9%)</td></tr> <tr><td>0 (0.0%)</td><td>0 (0.0%)</td><td>72 (66.4%)</td></tr> <tr><td>0 (0.0%)</td><td>0 (0.0%)</td><td>116 (106.7%)</td></tr> <tr><td>PDAC (174)</td><td>NoPDAC (70)</td><td>Normal (147)</td></tr> </table>     | 70 (64.8%) | 18 (16.7%) | 29 (26.9%)  | 0 (0.0%)   | 0 (0.0%)   | 72 (66.4%)   | 0 (0.0%) | 0 (0.0%)   | 116 (106.7%) | PDAC (174) | NoPDAC (70)  | Normal (147) |
| 49 (65.4%)                                                                                                                                                                                                                                                                                              | 11 (14.6%)   | 18 (24.0%)   |            |            |            |            |          |          |              |           |              |              |                                                                                                                                                                                                                                                                                                         |            |            |             |            |            |             |          |           |              |            |              |              |                                                                                                                                                                                                                                                                                                         |            |            |             |            |            |            |           |          |              |           |              |              |                                                                                                                                                                                                                                                                                                        |            |            |            |            |            |            |           |          |              |            |              |              |                                                                                                                                                                                                                                                                                                          |            |            |             |            |            |              |          |            |              |            |              |              |
| 21 (27.3%)                                                                                                                                                                                                                                                                                              | 31 (40.3%)   | 15 (19.7%)   |            |            |            |            |          |          |              |           |              |              |                                                                                                                                                                                                                                                                                                         |            |            |             |            |            |             |          |           |              |            |              |              |                                                                                                                                                                                                                                                                                                         |            |            |             |            |            |            |           |          |              |           |              |              |                                                                                                                                                                                                                                                                                                        |            |            |            |            |            |            |           |          |              |            |              |              |                                                                                                                                                                                                                                                                                                          |            |            |             |            |            |              |          |            |              |            |              |              |
| 0 (0.0%)                                                                                                                                                                                                                                                                                                | 0 (0.0%)     | 116 (153.3%) |            |            |            |            |          |          |              |           |              |              |                                                                                                                                                                                                                                                                                                         |            |            |             |            |            |             |          |           |              |            |              |              |                                                                                                                                                                                                                                                                                                         |            |            |             |            |            |            |           |          |              |           |              |              |                                                                                                                                                                                                                                                                                                        |            |            |            |            |            |            |           |          |              |            |              |              |                                                                                                                                                                                                                                                                                                          |            |            |             |            |            |              |          |            |              |            |              |              |
| PDAC (70)                                                                                                                                                                                                                                                                                               | NoPDAC (42)  | Normal (178) |            |            |            |            |          |          |              |           |              |              |                                                                                                                                                                                                                                                                                                         |            |            |             |            |            |             |          |           |              |            |              |              |                                                                                                                                                                                                                                                                                                         |            |            |             |            |            |            |           |          |              |           |              |              |                                                                                                                                                                                                                                                                                                        |            |            |            |            |            |            |           |          |              |            |              |              |                                                                                                                                                                                                                                                                                                          |            |            |             |            |            |              |          |            |              |            |              |              |
| 77 (71.3%)                                                                                                                                                                                                                                                                                              | 11 (10.2%)   | 20 (18.5%)   |            |            |            |            |          |          |              |           |              |              |                                                                                                                                                                                                                                                                                                         |            |            |             |            |            |             |          |           |              |            |              |              |                                                                                                                                                                                                                                                                                                         |            |            |             |            |            |            |           |          |              |           |              |              |                                                                                                                                                                                                                                                                                                        |            |            |            |            |            |            |           |          |              |            |              |              |                                                                                                                                                                                                                                                                                                          |            |            |             |            |            |              |          |            |              |            |              |              |
| 19 (28.4%)                                                                                                                                                                                                                                                                                              | 27 (39.7%)   | 11 (16.4%)   |            |            |            |            |          |          |              |           |              |              |                                                                                                                                                                                                                                                                                                         |            |            |             |            |            |             |          |           |              |            |              |              |                                                                                                                                                                                                                                                                                                         |            |            |             |            |            |            |           |          |              |           |              |              |                                                                                                                                                                                                                                                                                                        |            |            |            |            |            |            |           |          |              |            |              |              |                                                                                                                                                                                                                                                                                                          |            |            |             |            |            |              |          |            |              |            |              |              |
| 8 (8.0%)                                                                                                                                                                                                                                                                                                | 6 (5.2%)     | 102 (97.8%)  |            |            |            |            |          |          |              |           |              |              |                                                                                                                                                                                                                                                                                                         |            |            |             |            |            |             |          |           |              |            |              |              |                                                                                                                                                                                                                                                                                                         |            |            |             |            |            |            |           |          |              |           |              |              |                                                                                                                                                                                                                                                                                                        |            |            |            |            |            |            |           |          |              |            |              |              |                                                                                                                                                                                                                                                                                                          |            |            |             |            |            |              |          |            |              |            |              |              |
| PDAC (104)                                                                                                                                                                                                                                                                                              | NoPDAC (54)  | Normal (133) |            |            |            |            |          |          |              |           |              |              |                                                                                                                                                                                                                                                                                                         |            |            |             |            |            |             |          |           |              |            |              |              |                                                                                                                                                                                                                                                                                                         |            |            |             |            |            |            |           |          |              |           |              |              |                                                                                                                                                                                                                                                                                                        |            |            |            |            |            |            |           |          |              |            |              |              |                                                                                                                                                                                                                                                                                                          |            |            |             |            |            |              |          |            |              |            |              |              |
| 40 (17.4%)                                                                                                                                                                                                                                                                                              | 35 (15.4%)   | 11 (4.8%)    |            |            |            |            |          |          |              |           |              |              |                                                                                                                                                                                                                                                                                                         |            |            |             |            |            |             |          |           |              |            |              |              |                                                                                                                                                                                                                                                                                                         |            |            |             |            |            |            |           |          |              |           |              |              |                                                                                                                                                                                                                                                                                                        |            |            |            |            |            |            |           |          |              |            |              |              |                                                                                                                                                                                                                                                                                                          |            |            |             |            |            |              |          |            |              |            |              |              |
| 10 (4.6%)                                                                                                                                                                                                                                                                                               | 49 (21.3%)   | 8 (3.5%)     |            |            |            |            |          |          |              |           |              |              |                                                                                                                                                                                                                                                                                                         |            |            |             |            |            |             |          |           |              |            |              |              |                                                                                                                                                                                                                                                                                                         |            |            |             |            |            |            |           |          |              |           |              |              |                                                                                                                                                                                                                                                                                                        |            |            |            |            |            |            |           |          |              |            |              |              |                                                                                                                                                                                                                                                                                                          |            |            |             |            |            |              |          |            |              |            |              |              |
| 2 (0.9%)                                                                                                                                                                                                                                                                                                | 6 (2.7%)     | 106 (47.1%)  |            |            |            |            |          |          |              |           |              |              |                                                                                                                                                                                                                                                                                                         |            |            |             |            |            |             |          |           |              |            |              |              |                                                                                                                                                                                                                                                                                                         |            |            |             |            |            |            |           |          |              |           |              |              |                                                                                                                                                                                                                                                                                                        |            |            |            |            |            |            |           |          |              |            |              |              |                                                                                                                                                                                                                                                                                                          |            |            |             |            |            |              |          |            |              |            |              |              |
| PDAC (14)                                                                                                                                                                                                                                                                                               | NoPDAC (96)  | Normal (127) |            |            |            |            |          |          |              |           |              |              |                                                                                                                                                                                                                                                                                                         |            |            |             |            |            |             |          |           |              |            |              |              |                                                                                                                                                                                                                                                                                                         |            |            |             |            |            |            |           |          |              |           |              |              |                                                                                                                                                                                                                                                                                                        |            |            |            |            |            |            |           |          |              |            |              |              |                                                                                                                                                                                                                                                                                                          |            |            |             |            |            |              |          |            |              |            |              |              |
| 92 (85.2%)                                                                                                                                                                                                                                                                                              | 6 (5.6%)     | 11 (10.2%)   |            |            |            |            |          |          |              |           |              |              |                                                                                                                                                                                                                                                                                                         |            |            |             |            |            |             |          |           |              |            |              |              |                                                                                                                                                                                                                                                                                                         |            |            |             |            |            |            |           |          |              |           |              |              |                                                                                                                                                                                                                                                                                                        |            |            |            |            |            |            |           |          |              |            |              |              |                                                                                                                                                                                                                                                                                                          |            |            |             |            |            |              |          |            |              |            |              |              |
| 9 (8.4%)                                                                                                                                                                                                                                                                                                | 48 (44.4%)   | 10 (9.3%)    |            |            |            |            |          |          |              |           |              |              |                                                                                                                                                                                                                                                                                                         |            |            |             |            |            |             |          |           |              |            |              |              |                                                                                                                                                                                                                                                                                                         |            |            |             |            |            |            |           |          |              |           |              |              |                                                                                                                                                                                                                                                                                                        |            |            |            |            |            |            |           |          |              |            |              |              |                                                                                                                                                                                                                                                                                                          |            |            |             |            |            |              |          |            |              |            |              |              |
| 1 (0.9%)                                                                                                                                                                                                                                                                                                | 1 (0.9%)     | 114 (105.3%) |            |            |            |            |          |          |              |           |              |              |                                                                                                                                                                                                                                                                                                         |            |            |             |            |            |             |          |           |              |            |              |              |                                                                                                                                                                                                                                                                                                         |            |            |             |            |            |            |           |          |              |           |              |              |                                                                                                                                                                                                                                                                                                        |            |            |            |            |            |            |           |          |              |            |              |              |                                                                                                                                                                                                                                                                                                          |            |            |             |            |            |              |          |            |              |            |              |              |
| PDAC (102)                                                                                                                                                                                                                                                                                              | NoPDAC (64)  | Normal (135) |            |            |            |            |          |          |              |           |              |              |                                                                                                                                                                                                                                                                                                         |            |            |             |            |            |             |          |           |              |            |              |              |                                                                                                                                                                                                                                                                                                         |            |            |             |            |            |            |           |          |              |           |              |              |                                                                                                                                                                                                                                                                                                        |            |            |            |            |            |            |           |          |              |            |              |              |                                                                                                                                                                                                                                                                                                          |            |            |             |            |            |              |          |            |              |            |              |              |
| 70 (64.8%)                                                                                                                                                                                                                                                                                              | 18 (16.7%)   | 29 (26.9%)   |            |            |            |            |          |          |              |           |              |              |                                                                                                                                                                                                                                                                                                         |            |            |             |            |            |             |          |           |              |            |              |              |                                                                                                                                                                                                                                                                                                         |            |            |             |            |            |            |           |          |              |           |              |              |                                                                                                                                                                                                                                                                                                        |            |            |            |            |            |            |           |          |              |            |              |              |                                                                                                                                                                                                                                                                                                          |            |            |             |            |            |              |          |            |              |            |              |              |
| 0 (0.0%)                                                                                                                                                                                                                                                                                                | 0 (0.0%)     | 72 (66.4%)   |            |            |            |            |          |          |              |           |              |              |                                                                                                                                                                                                                                                                                                         |            |            |             |            |            |             |          |           |              |            |              |              |                                                                                                                                                                                                                                                                                                         |            |            |             |            |            |            |           |          |              |           |              |              |                                                                                                                                                                                                                                                                                                        |            |            |            |            |            |            |           |          |              |            |              |              |                                                                                                                                                                                                                                                                                                          |            |            |             |            |            |              |          |            |              |            |              |              |
| 0 (0.0%)                                                                                                                                                                                                                                                                                                | 0 (0.0%)     | 116 (106.7%) |            |            |            |            |          |          |              |           |              |              |                                                                                                                                                                                                                                                                                                         |            |            |             |            |            |             |          |           |              |            |              |              |                                                                                                                                                                                                                                                                                                         |            |            |             |            |            |            |           |          |              |           |              |              |                                                                                                                                                                                                                                                                                                        |            |            |            |            |            |            |           |          |              |            |              |              |                                                                                                                                                                                                                                                                                                          |            |            |             |            |            |              |          |            |              |            |              |              |
| PDAC (174)                                                                                                                                                                                                                                                                                              | NoPDAC (70)  | Normal (147) |            |            |            |            |          |          |              |           |              |              |                                                                                                                                                                                                                                                                                                         |            |            |             |            |            |             |          |           |              |            |              |              |                                                                                                                                                                                                                                                                                                         |            |            |             |            |            |            |           |          |              |           |              |              |                                                                                                                                                                                                                                                                                                        |            |            |            |            |            |            |           |          |              |            |              |              |                                                                                                                                                                                                                                                                                                          |            |            |             |            |            |              |          |            |              |            |              |              |
| <table border="1"> <tr><td>8 (75.0%)</td><td>1 (11.1%)</td><td>1 (13.9%)</td></tr> <tr><td>8 (11.5%)</td><td>20 (22.2%)</td><td>0 (0.0%)</td></tr> <tr><td>1 (0.9%)</td><td>1 (0.9%)</td><td>114 (105.3%)</td></tr> <tr><td>PDAC (90)</td><td>NoPDAC (83)</td><td>Normal (138)</td></tr> </table>       | 8 (75.0%)    | 1 (11.1%)    | 1 (13.9%)  | 8 (11.5%)  | 20 (22.2%) | 0 (0.0%)   | 1 (0.9%) | 1 (0.9%) | 114 (105.3%) | PDAC (90) | NoPDAC (83)  | Normal (138) | <table border="1"> <tr><td>10 (92.3%)</td><td>10 (92.3%)</td><td>14 (130.0%)</td></tr> <tr><td>1 (9.1%)</td><td>44 (40.7%)</td><td>13 (120.0%)</td></tr> <tr><td>1 (9.1%)</td><td>2 (1.9%)</td><td>111 (101.7%)</td></tr> <tr><td>PDAC (85)</td><td>NoPDAC (85)</td><td>Normal (138)</td></tr> </table> | 10 (92.3%) | 10 (92.3%) | 14 (130.0%) | 1 (9.1%)   | 44 (40.7%) | 13 (120.0%) | 1 (9.1%) | 2 (1.9%)  | 111 (101.7%) | PDAC (85)  | NoPDAC (85)  | Normal (138) | <table border="1"> <tr><td>10 (45.5%)</td><td>14 (62.2%)</td><td>29 (127.8%)</td></tr> <tr><td>4 (18.2%)</td><td>11 (47.8%)</td><td>12 (52.2%)</td></tr> <tr><td>0 (0.0%)</td><td>0 (0.0%)</td><td>116 (500.0%)</td></tr> <tr><td>PDAC (12)</td><td>NoPDAC (85)</td><td>Normal (154)</td></tr> </table> | 10 (45.5%) | 14 (62.2%) | 29 (127.8%) | 4 (18.2%)  | 11 (47.8%) | 12 (52.2%) | 0 (0.0%)  | 0 (0.0%) | 116 (500.0%) | PDAC (12) | NoPDAC (85)  | Normal (154) | <table border="1"> <tr><td>29 (24.4%)</td><td>29 (24.4%)</td><td>18 (15.0%)</td></tr> <tr><td>1 (0.8%)</td><td>19 (15.8%)</td><td>1 (0.8%)</td></tr> <tr><td>0 (0.0%)</td><td>0 (0.0%)</td><td>116 (100.0%)</td></tr> <tr><td>PDAC (86)</td><td>NoPDAC (78)</td><td>Normal (147)</td></tr> </table>    | 29 (24.4%) | 29 (24.4%) | 18 (15.0%) | 1 (0.8%)   | 19 (15.8%) | 1 (0.8%)   | 0 (0.0%)  | 0 (0.0%) | 116 (100.0%) | PDAC (86)  | NoPDAC (78)  | Normal (147) | <table border="1"> <tr><td>10 (15.9%)</td><td>27 (40.7%)</td><td>24 (35.4%)</td></tr> <tr><td>0 (0.0%)</td><td>1 (1.5%)</td><td>13 (19.4%)</td></tr> <tr><td>0 (0.0%)</td><td>0 (0.0%)</td><td>115 (172.5%)</td></tr> <tr><td>PDAC (82)</td><td>NoPDAC (76)</td><td>Normal (153)</td></tr> </table>      | 10 (15.9%) | 27 (40.7%) | 24 (35.4%)  | 0 (0.0%)   | 1 (1.5%)   | 13 (19.4%)   | 0 (0.0%) | 0 (0.0%)   | 115 (172.5%) | PDAC (82)  | NoPDAC (76)  | Normal (153) |
| 8 (75.0%)                                                                                                                                                                                                                                                                                               | 1 (11.1%)    | 1 (13.9%)    |            |            |            |            |          |          |              |           |              |              |                                                                                                                                                                                                                                                                                                         |            |            |             |            |            |             |          |           |              |            |              |              |                                                                                                                                                                                                                                                                                                         |            |            |             |            |            |            |           |          |              |           |              |              |                                                                                                                                                                                                                                                                                                        |            |            |            |            |            |            |           |          |              |            |              |              |                                                                                                                                                                                                                                                                                                          |            |            |             |            |            |              |          |            |              |            |              |              |
| 8 (11.5%)                                                                                                                                                                                                                                                                                               | 20 (22.2%)   | 0 (0.0%)     |            |            |            |            |          |          |              |           |              |              |                                                                                                                                                                                                                                                                                                         |            |            |             |            |            |             |          |           |              |            |              |              |                                                                                                                                                                                                                                                                                                         |            |            |             |            |            |            |           |          |              |           |              |              |                                                                                                                                                                                                                                                                                                        |            |            |            |            |            |            |           |          |              |            |              |              |                                                                                                                                                                                                                                                                                                          |            |            |             |            |            |              |          |            |              |            |              |              |
| 1 (0.9%)                                                                                                                                                                                                                                                                                                | 1 (0.9%)     | 114 (105.3%) |            |            |            |            |          |          |              |           |              |              |                                                                                                                                                                                                                                                                                                         |            |            |             |            |            |             |          |           |              |            |              |              |                                                                                                                                                                                                                                                                                                         |            |            |             |            |            |            |           |          |              |           |              |              |                                                                                                                                                                                                                                                                                                        |            |            |            |            |            |            |           |          |              |            |              |              |                                                                                                                                                                                                                                                                                                          |            |            |             |            |            |              |          |            |              |            |              |              |
| PDAC (90)                                                                                                                                                                                                                                                                                               | NoPDAC (83)  | Normal (138) |            |            |            |            |          |          |              |           |              |              |                                                                                                                                                                                                                                                                                                         |            |            |             |            |            |             |          |           |              |            |              |              |                                                                                                                                                                                                                                                                                                         |            |            |             |            |            |            |           |          |              |           |              |              |                                                                                                                                                                                                                                                                                                        |            |            |            |            |            |            |           |          |              |            |              |              |                                                                                                                                                                                                                                                                                                          |            |            |             |            |            |              |          |            |              |            |              |              |
| 10 (92.3%)                                                                                                                                                                                                                                                                                              | 10 (92.3%)   | 14 (130.0%)  |            |            |            |            |          |          |              |           |              |              |                                                                                                                                                                                                                                                                                                         |            |            |             |            |            |             |          |           |              |            |              |              |                                                                                                                                                                                                                                                                                                         |            |            |             |            |            |            |           |          |              |           |              |              |                                                                                                                                                                                                                                                                                                        |            |            |            |            |            |            |           |          |              |            |              |              |                                                                                                                                                                                                                                                                                                          |            |            |             |            |            |              |          |            |              |            |              |              |
| 1 (9.1%)                                                                                                                                                                                                                                                                                                | 44 (40.7%)   | 13 (120.0%)  |            |            |            |            |          |          |              |           |              |              |                                                                                                                                                                                                                                                                                                         |            |            |             |            |            |             |          |           |              |            |              |              |                                                                                                                                                                                                                                                                                                         |            |            |             |            |            |            |           |          |              |           |              |              |                                                                                                                                                                                                                                                                                                        |            |            |            |            |            |            |           |          |              |            |              |              |                                                                                                                                                                                                                                                                                                          |            |            |             |            |            |              |          |            |              |            |              |              |
| 1 (9.1%)                                                                                                                                                                                                                                                                                                | 2 (1.9%)     | 111 (101.7%) |            |            |            |            |          |          |              |           |              |              |                                                                                                                                                                                                                                                                                                         |            |            |             |            |            |             |          |           |              |            |              |              |                                                                                                                                                                                                                                                                                                         |            |            |             |            |            |            |           |          |              |           |              |              |                                                                                                                                                                                                                                                                                                        |            |            |            |            |            |            |           |          |              |            |              |              |                                                                                                                                                                                                                                                                                                          |            |            |             |            |            |              |          |            |              |            |              |              |
| PDAC (85)                                                                                                                                                                                                                                                                                               | NoPDAC (85)  | Normal (138) |            |            |            |            |          |          |              |           |              |              |                                                                                                                                                                                                                                                                                                         |            |            |             |            |            |             |          |           |              |            |              |              |                                                                                                                                                                                                                                                                                                         |            |            |             |            |            |            |           |          |              |           |              |              |                                                                                                                                                                                                                                                                                                        |            |            |            |            |            |            |           |          |              |            |              |              |                                                                                                                                                                                                                                                                                                          |            |            |             |            |            |              |          |            |              |            |              |              |
| 10 (45.5%)                                                                                                                                                                                                                                                                                              | 14 (62.2%)   | 29 (127.8%)  |            |            |            |            |          |          |              |           |              |              |                                                                                                                                                                                                                                                                                                         |            |            |             |            |            |             |          |           |              |            |              |              |                                                                                                                                                                                                                                                                                                         |            |            |             |            |            |            |           |          |              |           |              |              |                                                                                                                                                                                                                                                                                                        |            |            |            |            |            |            |           |          |              |            |              |              |                                                                                                                                                                                                                                                                                                          |            |            |             |            |            |              |          |            |              |            |              |              |
| 4 (18.2%)                                                                                                                                                                                                                                                                                               | 11 (47.8%)   | 12 (52.2%)   |            |            |            |            |          |          |              |           |              |              |                                                                                                                                                                                                                                                                                                         |            |            |             |            |            |             |          |           |              |            |              |              |                                                                                                                                                                                                                                                                                                         |            |            |             |            |            |            |           |          |              |           |              |              |                                                                                                                                                                                                                                                                                                        |            |            |            |            |            |            |           |          |              |            |              |              |                                                                                                                                                                                                                                                                                                          |            |            |             |            |            |              |          |            |              |            |              |              |
| 0 (0.0%)                                                                                                                                                                                                                                                                                                | 0 (0.0%)     | 116 (500.0%) |            |            |            |            |          |          |              |           |              |              |                                                                                                                                                                                                                                                                                                         |            |            |             |            |            |             |          |           |              |            |              |              |                                                                                                                                                                                                                                                                                                         |            |            |             |            |            |            |           |          |              |           |              |              |                                                                                                                                                                                                                                                                                                        |            |            |            |            |            |            |           |          |              |            |              |              |                                                                                                                                                                                                                                                                                                          |            |            |             |            |            |              |          |            |              |            |              |              |
| PDAC (12)                                                                                                                                                                                                                                                                                               | NoPDAC (85)  | Normal (154) |            |            |            |            |          |          |              |           |              |              |                                                                                                                                                                                                                                                                                                         |            |            |             |            |            |             |          |           |              |            |              |              |                                                                                                                                                                                                                                                                                                         |            |            |             |            |            |            |           |          |              |           |              |              |                                                                                                                                                                                                                                                                                                        |            |            |            |            |            |            |           |          |              |            |              |              |                                                                                                                                                                                                                                                                                                          |            |            |             |            |            |              |          |            |              |            |              |              |
| 29 (24.4%)                                                                                                                                                                                                                                                                                              | 29 (24.4%)   | 18 (15.0%)   |            |            |            |            |          |          |              |           |              |              |                                                                                                                                                                                                                                                                                                         |            |            |             |            |            |             |          |           |              |            |              |              |                                                                                                                                                                                                                                                                                                         |            |            |             |            |            |            |           |          |              |           |              |              |                                                                                                                                                                                                                                                                                                        |            |            |            |            |            |            |           |          |              |            |              |              |                                                                                                                                                                                                                                                                                                          |            |            |             |            |            |              |          |            |              |            |              |              |
| 1 (0.8%)                                                                                                                                                                                                                                                                                                | 19 (15.8%)   | 1 (0.8%)     |            |            |            |            |          |          |              |           |              |              |                                                                                                                                                                                                                                                                                                         |            |            |             |            |            |             |          |           |              |            |              |              |                                                                                                                                                                                                                                                                                                         |            |            |             |            |            |            |           |          |              |           |              |              |                                                                                                                                                                                                                                                                                                        |            |            |            |            |            |            |           |          |              |            |              |              |                                                                                                                                                                                                                                                                                                          |            |            |             |            |            |              |          |            |              |            |              |              |
| 0 (0.0%)                                                                                                                                                                                                                                                                                                | 0 (0.0%)     | 116 (100.0%) |            |            |            |            |          |          |              |           |              |              |                                                                                                                                                                                                                                                                                                         |            |            |             |            |            |             |          |           |              |            |              |              |                                                                                                                                                                                                                                                                                                         |            |            |             |            |            |            |           |          |              |           |              |              |                                                                                                                                                                                                                                                                                                        |            |            |            |            |            |            |           |          |              |            |              |              |                                                                                                                                                                                                                                                                                                          |            |            |             |            |            |              |          |            |              |            |              |              |
| PDAC (86)                                                                                                                                                                                                                                                                                               | NoPDAC (78)  | Normal (147) |            |            |            |            |          |          |              |           |              |              |                                                                                                                                                                                                                                                                                                         |            |            |             |            |            |             |          |           |              |            |              |              |                                                                                                                                                                                                                                                                                                         |            |            |             |            |            |            |           |          |              |           |              |              |                                                                                                                                                                                                                                                                                                        |            |            |            |            |            |            |           |          |              |            |              |              |                                                                                                                                                                                                                                                                                                          |            |            |             |            |            |              |          |            |              |            |              |              |
| 10 (15.9%)                                                                                                                                                                                                                                                                                              | 27 (40.7%)   | 24 (35.4%)   |            |            |            |            |          |          |              |           |              |              |                                                                                                                                                                                                                                                                                                         |            |            |             |            |            |             |          |           |              |            |              |              |                                                                                                                                                                                                                                                                                                         |            |            |             |            |            |            |           |          |              |           |              |              |                                                                                                                                                                                                                                                                                                        |            |            |            |            |            |            |           |          |              |            |              |              |                                                                                                                                                                                                                                                                                                          |            |            |             |            |            |              |          |            |              |            |              |              |
| 0 (0.0%)                                                                                                                                                                                                                                                                                                | 1 (1.5%)     | 13 (19.4%)   |            |            |            |            |          |          |              |           |              |              |                                                                                                                                                                                                                                                                                                         |            |            |             |            |            |             |          |           |              |            |              |              |                                                                                                                                                                                                                                                                                                         |            |            |             |            |            |            |           |          |              |           |              |              |                                                                                                                                                                                                                                                                                                        |            |            |            |            |            |            |           |          |              |            |              |              |                                                                                                                                                                                                                                                                                                          |            |            |             |            |            |              |          |            |              |            |              |              |
| 0 (0.0%)                                                                                                                                                                                                                                                                                                | 0 (0.0%)     | 115 (172.5%) |            |            |            |            |          |          |              |           |              |              |                                                                                                                                                                                                                                                                                                         |            |            |             |            |            |             |          |           |              |            |              |              |                                                                                                                                                                                                                                                                                                         |            |            |             |            |            |            |           |          |              |           |              |              |                                                                                                                                                                                                                                                                                                        |            |            |            |            |            |            |           |          |              |            |              |              |                                                                                                                                                                                                                                                                                                          |            |            |             |            |            |              |          |            |              |            |              |              |
| PDAC (82)                                                                                                                                                                                                                                                                                               | NoPDAC (76)  | Normal (153) |            |            |            |            |          |          |              |           |              |              |                                                                                                                                                                                                                                                                                                         |            |            |             |            |            |             |          |           |              |            |              |              |                                                                                                                                                                                                                                                                                                         |            |            |             |            |            |            |           |          |              |           |              |              |                                                                                                                                                                                                                                                                                                        |            |            |            |            |            |            |           |          |              |            |              |              |                                                                                                                                                                                                                                                                                                          |            |            |             |            |            |              |          |            |              |            |              |              |
| <table border="1"> <tr><td>5 (17.2%)</td><td>41 (88.0%)</td><td>16 (44.8%)</td></tr> <tr><td>7 (24.3%)</td><td>5 (16.1%)</td><td>7 (22.9%)</td></tr> <tr><td>0 (0.0%)</td><td>1 (3.1%)</td><td>110 (34.0%)</td></tr> <tr><td>PDAC (58)</td><td>NoPDAC (111)</td><td>Normal (132)</td></tr> </table>     | 5 (17.2%)    | 41 (88.0%)   | 16 (44.8%) | 7 (24.3%)  | 5 (16.1%)  | 7 (22.9%)  | 0 (0.0%) | 1 (3.1%) | 110 (34.0%)  | PDAC (58) | NoPDAC (111) | Normal (132) | <table border="1"> <tr><td>71 (87.5%)</td><td>25 (30.7%)</td><td>12 (14.6%)</td></tr> <tr><td>13 (16.0%)</td><td>21 (26.3%)</td><td>17 (21.3%)</td></tr> <tr><td>1 (1.3%)</td><td>2 (2.6%)</td><td>88 (110.0%)</td></tr> <tr><td>PDAC (130)</td><td>NoPDAC (81)</td><td>Normal (110)</td></tr> </table> | 71 (87.5%) | 25 (30.7%) | 12 (14.6%)  | 13 (16.0%) | 21 (26.3%) | 17 (21.3%)  | 1 (1.3%) | 2 (2.6%)  | 88 (110.0%)  | PDAC (130) | NoPDAC (81)  | Normal (110) | <table border="1"> <tr><td>71 (65.7%)</td><td>11 (10.1%)</td><td>8 (7.4%)</td></tr> <tr><td>19 (17.6%)</td><td>16 (14.7%)</td><td>3 (2.8%)</td></tr> <tr><td>6 (5.6%)</td><td>0 (0.0%)</td><td>67 (61.5%)</td></tr> <tr><td>PDAC (90)</td><td>NoPDAC (136)</td><td>Normal (85)</td></tr> </table>       | 71 (65.7%) | 11 (10.1%) | 8 (7.4%)    | 19 (17.6%) | 16 (14.7%) | 3 (2.8%)   | 6 (5.6%)  | 0 (0.0%) | 67 (61.5%)   | PDAC (90) | NoPDAC (136) | Normal (85)  | <table border="1"> <tr><td>10 (11.1%)</td><td>18 (14.8%)</td><td>21 (17.3%)</td></tr> <tr><td>13 (14.8%)</td><td>17 (13.9%)</td><td>17 (13.9%)</td></tr> <tr><td>1 (1.1%)</td><td>0 (0.0%)</td><td>114 (99.3%)</td></tr> <tr><td>PDAC (84)</td><td>NoPDAC (83)</td><td>Normal (154)</td></tr> </table> | 10 (11.1%) | 18 (14.8%) | 21 (17.3%) | 13 (14.8%) | 17 (13.9%) | 17 (13.9%) | 1 (1.1%)  | 0 (0.0%) | 114 (99.3%)  | PDAC (84)  | NoPDAC (83)  | Normal (154) | <table border="1"> <tr><td>17 (82.0%)</td><td>14 (64.8%)</td><td>26 (123.1%)</td></tr> <tr><td>3 (14.3%)</td><td>21 (95.5%)</td><td>11 (49.3%)</td></tr> <tr><td>1 (4.8%)</td><td>4 (18.2%)</td><td>102 (451.4%)</td></tr> <tr><td>PDAC (85)</td><td>NoPDAC (85)</td><td>Normal (141)</td></tr> </table> | 17 (82.0%) | 14 (64.8%) | 26 (123.1%) | 3 (14.3%)  | 21 (95.5%) | 11 (49.3%)   | 1 (4.8%) | 4 (18.2%)  | 102 (451.4%) | PDAC (85)  | NoPDAC (85)  | Normal (141) |
| 5 (17.2%)                                                                                                                                                                                                                                                                                               | 41 (88.0%)   | 16 (44.8%)   |            |            |            |            |          |          |              |           |              |              |                                                                                                                                                                                                                                                                                                         |            |            |             |            |            |             |          |           |              |            |              |              |                                                                                                                                                                                                                                                                                                         |            |            |             |            |            |            |           |          |              |           |              |              |                                                                                                                                                                                                                                                                                                        |            |            |            |            |            |            |           |          |              |            |              |              |                                                                                                                                                                                                                                                                                                          |            |            |             |            |            |              |          |            |              |            |              |              |
| 7 (24.3%)                                                                                                                                                                                                                                                                                               | 5 (16.1%)    | 7 (22.9%)    |            |            |            |            |          |          |              |           |              |              |                                                                                                                                                                                                                                                                                                         |            |            |             |            |            |             |          |           |              |            |              |              |                                                                                                                                                                                                                                                                                                         |            |            |             |            |            |            |           |          |              |           |              |              |                                                                                                                                                                                                                                                                                                        |            |            |            |            |            |            |           |          |              |            |              |              |                                                                                                                                                                                                                                                                                                          |            |            |             |            |            |              |          |            |              |            |              |              |
| 0 (0.0%)                                                                                                                                                                                                                                                                                                | 1 (3.1%)     | 110 (34.0%)  |            |            |            |            |          |          |              |           |              |              |                                                                                                                                                                                                                                                                                                         |            |            |             |            |            |             |          |           |              |            |              |              |                                                                                                                                                                                                                                                                                                         |            |            |             |            |            |            |           |          |              |           |              |              |                                                                                                                                                                                                                                                                                                        |            |            |            |            |            |            |           |          |              |            |              |              |                                                                                                                                                                                                                                                                                                          |            |            |             |            |            |              |          |            |              |            |              |              |
| PDAC (58)                                                                                                                                                                                                                                                                                               | NoPDAC (111) | Normal (132) |            |            |            |            |          |          |              |           |              |              |                                                                                                                                                                                                                                                                                                         |            |            |             |            |            |             |          |           |              |            |              |              |                                                                                                                                                                                                                                                                                                         |            |            |             |            |            |            |           |          |              |           |              |              |                                                                                                                                                                                                                                                                                                        |            |            |            |            |            |            |           |          |              |            |              |              |                                                                                                                                                                                                                                                                                                          |            |            |             |            |            |              |          |            |              |            |              |              |
| 71 (87.5%)                                                                                                                                                                                                                                                                                              | 25 (30.7%)   | 12 (14.6%)   |            |            |            |            |          |          |              |           |              |              |                                                                                                                                                                                                                                                                                                         |            |            |             |            |            |             |          |           |              |            |              |              |                                                                                                                                                                                                                                                                                                         |            |            |             |            |            |            |           |          |              |           |              |              |                                                                                                                                                                                                                                                                                                        |            |            |            |            |            |            |           |          |              |            |              |              |                                                                                                                                                                                                                                                                                                          |            |            |             |            |            |              |          |            |              |            |              |              |
| 13 (16.0%)                                                                                                                                                                                                                                                                                              | 21 (26.3%)   | 17 (21.3%)   |            |            |            |            |          |          |              |           |              |              |                                                                                                                                                                                                                                                                                                         |            |            |             |            |            |             |          |           |              |            |              |              |                                                                                                                                                                                                                                                                                                         |            |            |             |            |            |            |           |          |              |           |              |              |                                                                                                                                                                                                                                                                                                        |            |            |            |            |            |            |           |          |              |            |              |              |                                                                                                                                                                                                                                                                                                          |            |            |             |            |            |              |          |            |              |            |              |              |
| 1 (1.3%)                                                                                                                                                                                                                                                                                                | 2 (2.6%)     | 88 (110.0%)  |            |            |            |            |          |          |              |           |              |              |                                                                                                                                                                                                                                                                                                         |            |            |             |            |            |             |          |           |              |            |              |              |                                                                                                                                                                                                                                                                                                         |            |            |             |            |            |            |           |          |              |           |              |              |                                                                                                                                                                                                                                                                                                        |            |            |            |            |            |            |           |          |              |            |              |              |                                                                                                                                                                                                                                                                                                          |            |            |             |            |            |              |          |            |              |            |              |              |
| PDAC (130)                                                                                                                                                                                                                                                                                              | NoPDAC (81)  | Normal (110) |            |            |            |            |          |          |              |           |              |              |                                                                                                                                                                                                                                                                                                         |            |            |             |            |            |             |          |           |              |            |              |              |                                                                                                                                                                                                                                                                                                         |            |            |             |            |            |            |           |          |              |           |              |              |                                                                                                                                                                                                                                                                                                        |            |            |            |            |            |            |           |          |              |            |              |              |                                                                                                                                                                                                                                                                                                          |            |            |             |            |            |              |          |            |              |            |              |              |
| 71 (65.7%)                                                                                                                                                                                                                                                                                              | 11 (10.1%)   | 8 (7.4%)     |            |            |            |            |          |          |              |           |              |              |                                                                                                                                                                                                                                                                                                         |            |            |             |            |            |             |          |           |              |            |              |              |                                                                                                                                                                                                                                                                                                         |            |            |             |            |            |            |           |          |              |           |              |              |                                                                                                                                                                                                                                                                                                        |            |            |            |            |            |            |           |          |              |            |              |              |                                                                                                                                                                                                                                                                                                          |            |            |             |            |            |              |          |            |              |            |              |              |
| 19 (17.6%)                                                                                                                                                                                                                                                                                              | 16 (14.7%)   | 3 (2.8%)     |            |            |            |            |          |          |              |           |              |              |                                                                                                                                                                                                                                                                                                         |            |            |             |            |            |             |          |           |              |            |              |              |                                                                                                                                                                                                                                                                                                         |            |            |             |            |            |            |           |          |              |           |              |              |                                                                                                                                                                                                                                                                                                        |            |            |            |            |            |            |           |          |              |            |              |              |                                                                                                                                                                                                                                                                                                          |            |            |             |            |            |              |          |            |              |            |              |              |
| 6 (5.6%)                                                                                                                                                                                                                                                                                                | 0 (0.0%)     | 67 (61.5%)   |            |            |            |            |          |          |              |           |              |              |                                                                                                                                                                                                                                                                                                         |            |            |             |            |            |             |          |           |              |            |              |              |                                                                                                                                                                                                                                                                                                         |            |            |             |            |            |            |           |          |              |           |              |              |                                                                                                                                                                                                                                                                                                        |            |            |            |            |            |            |           |          |              |            |              |              |                                                                                                                                                                                                                                                                                                          |            |            |             |            |            |              |          |            |              |            |              |              |
| PDAC (90)                                                                                                                                                                                                                                                                                               | NoPDAC (136) | Normal (85)  |            |            |            |            |          |          |              |           |              |              |                                                                                                                                                                                                                                                                                                         |            |            |             |            |            |             |          |           |              |            |              |              |                                                                                                                                                                                                                                                                                                         |            |            |             |            |            |            |           |          |              |           |              |              |                                                                                                                                                                                                                                                                                                        |            |            |            |            |            |            |           |          |              |            |              |              |                                                                                                                                                                                                                                                                                                          |            |            |             |            |            |              |          |            |              |            |              |              |
| 10 (11.1%)                                                                                                                                                                                                                                                                                              | 18 (14.8%)   | 21 (17.3%)   |            |            |            |            |          |          |              |           |              |              |                                                                                                                                                                                                                                                                                                         |            |            |             |            |            |             |          |           |              |            |              |              |                                                                                                                                                                                                                                                                                                         |            |            |             |            |            |            |           |          |              |           |              |              |                                                                                                                                                                                                                                                                                                        |            |            |            |            |            |            |           |          |              |            |              |              |                                                                                                                                                                                                                                                                                                          |            |            |             |            |            |              |          |            |              |            |              |              |
| 13 (14.8%)                                                                                                                                                                                                                                                                                              | 17 (13.9%)   | 17 (13.9%)   |            |            |            |            |          |          |              |           |              |              |                                                                                                                                                                                                                                                                                                         |            |            |             |            |            |             |          |           |              |            |              |              |                                                                                                                                                                                                                                                                                                         |            |            |             |            |            |            |           |          |              |           |              |              |                                                                                                                                                                                                                                                                                                        |            |            |            |            |            |            |           |          |              |            |              |              |                                                                                                                                                                                                                                                                                                          |            |            |             |            |            |              |          |            |              |            |              |              |
| 1 (1.1%)                                                                                                                                                                                                                                                                                                | 0 (0.0%)     | 114 (99.3%)  |            |            |            |            |          |          |              |           |              |              |                                                                                                                                                                                                                                                                                                         |            |            |             |            |            |             |          |           |              |            |              |              |                                                                                                                                                                                                                                                                                                         |            |            |             |            |            |            |           |          |              |           |              |              |                                                                                                                                                                                                                                                                                                        |            |            |            |            |            |            |           |          |              |            |              |              |                                                                                                                                                                                                                                                                                                          |            |            |             |            |            |              |          |            |              |            |              |              |
| PDAC (84)                                                                                                                                                                                                                                                                                               | NoPDAC (83)  | Normal (154) |            |            |            |            |          |          |              |           |              |              |                                                                                                                                                                                                                                                                                                         |            |            |             |            |            |             |          |           |              |            |              |              |                                                                                                                                                                                                                                                                                                         |            |            |             |            |            |            |           |          |              |           |              |              |                                                                                                                                                                                                                                                                                                        |            |            |            |            |            |            |           |          |              |            |              |              |                                                                                                                                                                                                                                                                                                          |            |            |             |            |            |              |          |            |              |            |              |              |
| 17 (82.0%)                                                                                                                                                                                                                                                                                              | 14 (64.8%)   | 26 (123.1%)  |            |            |            |            |          |          |              |           |              |              |                                                                                                                                                                                                                                                                                                         |            |            |             |            |            |             |          |           |              |            |              |              |                                                                                                                                                                                                                                                                                                         |            |            |             |            |            |            |           |          |              |           |              |              |                                                                                                                                                                                                                                                                                                        |            |            |            |            |            |            |           |          |              |            |              |              |                                                                                                                                                                                                                                                                                                          |            |            |             |            |            |              |          |            |              |            |              |              |
| 3 (14.3%)                                                                                                                                                                                                                                                                                               | 21 (95.5%)   | 11 (49.3%)   |            |            |            |            |          |          |              |           |              |              |                                                                                                                                                                                                                                                                                                         |            |            |             |            |            |             |          |           |              |            |              |              |                                                                                                                                                                                                                                                                                                         |            |            |             |            |            |            |           |          |              |           |              |              |                                                                                                                                                                                                                                                                                                        |            |            |            |            |            |            |           |          |              |            |              |              |                                                                                                                                                                                                                                                                                                          |            |            |             |            |            |              |          |            |              |            |              |              |
| 1 (4.8%)                                                                                                                                                                                                                                                                                                | 4 (18.2%)    | 102 (451.4%) |            |            |            |            |          |          |              |           |              |              |                                                                                                                                                                                                                                                                                                         |            |            |             |            |            |             |          |           |              |            |              |              |                                                                                                                                                                                                                                                                                                         |            |            |             |            |            |            |           |          |              |           |              |              |                                                                                                                                                                                                                                                                                                        |            |            |            |            |            |            |           |          |              |            |              |              |                                                                                                                                                                                                                                                                                                          |            |            |             |            |            |              |          |            |              |            |              |              |
| PDAC (85)                                                                                                                                                                                                                                                                                               | NoPDAC (85)  | Normal (141) |            |            |            |            |          |          |              |           |              |              |                                                                                                                                                                                                                                                                                                         |            |            |             |            |            |             |          |           |              |            |              |              |                                                                                                                                                                                                                                                                                                         |            |            |             |            |            |            |           |          |              |           |              |              |                                                                                                                                                                                                                                                                                                        |            |            |            |            |            |            |           |          |              |            |              |              |                                                                                                                                                                                                                                                                                                          |            |            |             |            |            |              |          |            |              |            |              |              |
| <table border="1"> <tr><td>48 (44.4%)</td><td>9 (33.3%)</td><td>24 (22.2%)</td></tr> <tr><td>10 (14.9%)</td><td>4 (14.3%)</td><td>14 (20.0%)</td></tr> <tr><td>2 (2.8%)</td><td>2 (7.1%)</td><td>111 (77.7%)</td></tr> <tr><td>PDAC (80)</td><td>NoPDAC (82)</td><td>Normal (149)</td></tr> </table>    | 48 (44.4%)   | 9 (33.3%)    | 24 (22.2%) | 10 (14.9%) | 4 (14.3%)  | 14 (20.0%) | 2 (2.8%) | 2 (7.1%) | 111 (77.7%)  | PDAC (80) | NoPDAC (82)  | Normal (149) | <table border="1"> <tr><td>70 (72.2%)</td><td>8 (8.3%)</td><td>24 (24.2%)</td></tr> <tr><td>11 (11.3%)</td><td>27 (27.7%)</td><td>13 (13.1%)</td></tr> <tr><td>1 (1.0%)</td><td>1 (1.0%)</td><td>105 (105.0%)</td></tr> <tr><td>PDAC (116)</td><td>NoPDAC (34)</td><td>Normal (141)</td></tr> </table>  | 70 (72.2%) | 8 (8.3%)   | 24 (24.2%)  | 11 (11.3%) | 27 (27.7%) | 13 (13.1%)  | 1 (1.0%) | 1 (1.0%)  | 105 (105.0%) | PDAC (116) | NoPDAC (34)  | Normal (141) | <table border="1"> <tr><td>71 (68.9%)</td><td>18 (16.7%)</td><td>18 (14.8%)</td></tr> <tr><td>7 (6.7%)</td><td>10 (9.3%)</td><td>13 (11.9%)</td></tr> <tr><td>1 (0.9%)</td><td>0 (0.0%)</td><td>111 (100.0%)</td></tr> <tr><td>PDAC (84)</td><td>NoPDAC (87)</td><td>Normal (140)</td></tr> </table>    | 71 (68.9%) | 18 (16.7%) | 18 (14.8%)  | 7 (6.7%)   | 10 (9.3%)  | 13 (11.9%) | 1 (0.9%)  | 0 (0.0%) | 111 (100.0%) | PDAC (84) | NoPDAC (87)  | Normal (140) | <table border="1"> <tr><td>10 (11.1%)</td><td>26 (22.2%)</td><td>18 (16.7%)</td></tr> <tr><td>7 (7.8%)</td><td>45 (38.9%)</td><td>11 (9.3%)</td></tr> <tr><td>4 (4.4%)</td><td>5 (4.4%)</td><td>107 (92.9%)</td></tr> <tr><td>PDAC (77)</td><td>NoPDAC (78)</td><td>Normal (136)</td></tr> </table>    | 10 (11.1%) | 26 (22.2%) | 18 (16.7%) | 7 (7.8%)   | 45 (38.9%) | 11 (9.3%)  | 4 (4.4%)  | 5 (4.4%) | 107 (92.9%)  | PDAC (77)  | NoPDAC (78)  | Normal (136) | <table border="1"> <tr><td>77 (70.4%)</td><td>20 (18.5%)</td><td>12 (11.1%)</td></tr> <tr><td>14 (12.6%)</td><td>21 (19.3%)</td><td>10 (9.3%)</td></tr> <tr><td>1 (0.9%)</td><td>8 (7.4%)</td><td>102 (92.9%)</td></tr> <tr><td>PDAC (83)</td><td>NoPDAC (71)</td><td>Normal (127)</td></tr> </table>    | 77 (70.4%) | 20 (18.5%) | 12 (11.1%)  | 14 (12.6%) | 21 (19.3%) | 10 (9.3%)    | 1 (0.9%) | 8 (7.4%)   | 102 (92.9%)  | PDAC (83)  | NoPDAC (71)  | Normal (127) |
| 48 (44.4%)                                                                                                                                                                                                                                                                                              | 9 (33.3%)    | 24 (22.2%)   |            |            |            |            |          |          |              |           |              |              |                                                                                                                                                                                                                                                                                                         |            |            |             |            |            |             |          |           |              |            |              |              |                                                                                                                                                                                                                                                                                                         |            |            |             |            |            |            |           |          |              |           |              |              |                                                                                                                                                                                                                                                                                                        |            |            |            |            |            |            |           |          |              |            |              |              |                                                                                                                                                                                                                                                                                                          |            |            |             |            |            |              |          |            |              |            |              |              |
| 10 (14.9%)                                                                                                                                                                                                                                                                                              | 4 (14.3%)    | 14 (20.0%)   |            |            |            |            |          |          |              |           |              |              |                                                                                                                                                                                                                                                                                                         |            |            |             |            |            |             |          |           |              |            |              |              |                                                                                                                                                                                                                                                                                                         |            |            |             |            |            |            |           |          |              |           |              |              |                                                                                                                                                                                                                                                                                                        |            |            |            |            |            |            |           |          |              |            |              |              |                                                                                                                                                                                                                                                                                                          |            |            |             |            |            |              |          |            |              |            |              |              |
| 2 (2.8%)                                                                                                                                                                                                                                                                                                | 2 (7.1%)     | 111 (77.7%)  |            |            |            |            |          |          |              |           |              |              |                                                                                                                                                                                                                                                                                                         |            |            |             |            |            |             |          |           |              |            |              |              |                                                                                                                                                                                                                                                                                                         |            |            |             |            |            |            |           |          |              |           |              |              |                                                                                                                                                                                                                                                                                                        |            |            |            |            |            |            |           |          |              |            |              |              |                                                                                                                                                                                                                                                                                                          |            |            |             |            |            |              |          |            |              |            |              |              |
| PDAC (80)                                                                                                                                                                                                                                                                                               | NoPDAC (82)  | Normal (149) |            |            |            |            |          |          |              |           |              |              |                                                                                                                                                                                                                                                                                                         |            |            |             |            |            |             |          |           |              |            |              |              |                                                                                                                                                                                                                                                                                                         |            |            |             |            |            |            |           |          |              |           |              |              |                                                                                                                                                                                                                                                                                                        |            |            |            |            |            |            |           |          |              |            |              |              |                                                                                                                                                                                                                                                                                                          |            |            |             |            |            |              |          |            |              |            |              |              |
| 70 (72.2%)                                                                                                                                                                                                                                                                                              | 8 (8.3%)     | 24 (24.2%)   |            |            |            |            |          |          |              |           |              |              |                                                                                                                                                                                                                                                                                                         |            |            |             |            |            |             |          |           |              |            |              |              |                                                                                                                                                                                                                                                                                                         |            |            |             |            |            |            |           |          |              |           |              |              |                                                                                                                                                                                                                                                                                                        |            |            |            |            |            |            |           |          |              |            |              |              |                                                                                                                                                                                                                                                                                                          |            |            |             |            |            |              |          |            |              |            |              |              |
| 11 (11.3%)                                                                                                                                                                                                                                                                                              | 27 (27.7%)   | 13 (13.1%)   |            |            |            |            |          |          |              |           |              |              |                                                                                                                                                                                                                                                                                                         |            |            |             |            |            |             |          |           |              |            |              |              |                                                                                                                                                                                                                                                                                                         |            |            |             |            |            |            |           |          |              |           |              |              |                                                                                                                                                                                                                                                                                                        |            |            |            |            |            |            |           |          |              |            |              |              |                                                                                                                                                                                                                                                                                                          |            |            |             |            |            |              |          |            |              |            |              |              |
| 1 (1.0%)                                                                                                                                                                                                                                                                                                | 1 (1.0%)     | 105 (105.0%) |            |            |            |            |          |          |              |           |              |              |                                                                                                                                                                                                                                                                                                         |            |            |             |            |            |             |          |           |              |            |              |              |                                                                                                                                                                                                                                                                                                         |            |            |             |            |            |            |           |          |              |           |              |              |                                                                                                                                                                                                                                                                                                        |            |            |            |            |            |            |           |          |              |            |              |              |                                                                                                                                                                                                                                                                                                          |            |            |             |            |            |              |          |            |              |            |              |              |
| PDAC (116)                                                                                                                                                                                                                                                                                              | NoPDAC (34)  | Normal (141) |            |            |            |            |          |          |              |           |              |              |                                                                                                                                                                                                                                                                                                         |            |            |             |            |            |             |          |           |              |            |              |              |                                                                                                                                                                                                                                                                                                         |            |            |             |            |            |            |           |          |              |           |              |              |                                                                                                                                                                                                                                                                                                        |            |            |            |            |            |            |           |          |              |            |              |              |                                                                                                                                                                                                                                                                                                          |            |            |             |            |            |              |          |            |              |            |              |              |
| 71 (68.9%)                                                                                                                                                                                                                                                                                              | 18 (16.7%)   | 18 (14.8%)   |            |            |            |            |          |          |              |           |              |              |                                                                                                                                                                                                                                                                                                         |            |            |             |            |            |             |          |           |              |            |              |              |                                                                                                                                                                                                                                                                                                         |            |            |             |            |            |            |           |          |              |           |              |              |                                                                                                                                                                                                                                                                                                        |            |            |            |            |            |            |           |          |              |            |              |              |                                                                                                                                                                                                                                                                                                          |            |            |             |            |            |              |          |            |              |            |              |              |
| 7 (6.7%)                                                                                                                                                                                                                                                                                                | 10 (9.3%)    | 13 (11.9%)   |            |            |            |            |          |          |              |           |              |              |                                                                                                                                                                                                                                                                                                         |            |            |             |            |            |             |          |           |              |            |              |              |                                                                                                                                                                                                                                                                                                         |            |            |             |            |            |            |           |          |              |           |              |              |                                                                                                                                                                                                                                                                                                        |            |            |            |            |            |            |           |          |              |            |              |              |                                                                                                                                                                                                                                                                                                          |            |            |             |            |            |              |          |            |              |            |              |              |
| 1 (0.9%)                                                                                                                                                                                                                                                                                                | 0 (0.0%)     | 111 (100.0%) |            |            |            |            |          |          |              |           |              |              |                                                                                                                                                                                                                                                                                                         |            |            |             |            |            |             |          |           |              |            |              |              |                                                                                                                                                                                                                                                                                                         |            |            |             |            |            |            |           |          |              |           |              |              |                                                                                                                                                                                                                                                                                                        |            |            |            |            |            |            |           |          |              |            |              |              |                                                                                                                                                                                                                                                                                                          |            |            |             |            |            |              |          |            |              |            |              |              |
| PDAC (84)                                                                                                                                                                                                                                                                                               | NoPDAC (87)  | Normal (140) |            |            |            |            |          |          |              |           |              |              |                                                                                                                                                                                                                                                                                                         |            |            |             |            |            |             |          |           |              |            |              |              |                                                                                                                                                                                                                                                                                                         |            |            |             |            |            |            |           |          |              |           |              |              |                                                                                                                                                                                                                                                                                                        |            |            |            |            |            |            |           |          |              |            |              |              |                                                                                                                                                                                                                                                                                                          |            |            |             |            |            |              |          |            |              |            |              |              |
| 10 (11.1%)                                                                                                                                                                                                                                                                                              | 26 (22.2%)   | 18 (16.7%)   |            |            |            |            |          |          |              |           |              |              |                                                                                                                                                                                                                                                                                                         |            |            |             |            |            |             |          |           |              |            |              |              |                                                                                                                                                                                                                                                                                                         |            |            |             |            |            |            |           |          |              |           |              |              |                                                                                                                                                                                                                                                                                                        |            |            |            |            |            |            |           |          |              |            |              |              |                                                                                                                                                                                                                                                                                                          |            |            |             |            |            |              |          |            |              |            |              |              |
| 7 (7.8%)                                                                                                                                                                                                                                                                                                | 45 (38.9%)   | 11 (9.3%)    |            |            |            |            |          |          |              |           |              |              |                                                                                                                                                                                                                                                                                                         |            |            |             |            |            |             |          |           |              |            |              |              |                                                                                                                                                                                                                                                                                                         |            |            |             |            |            |            |           |          |              |           |              |              |                                                                                                                                                                                                                                                                                                        |            |            |            |            |            |            |           |          |              |            |              |              |                                                                                                                                                                                                                                                                                                          |            |            |             |            |            |              |          |            |              |            |              |              |
| 4 (4.4%)                                                                                                                                                                                                                                                                                                | 5 (4.4%)     | 107 (92.9%)  |            |            |            |            |          |          |              |           |              |              |                                                                                                                                                                                                                                                                                                         |            |            |             |            |            |             |          |           |              |            |              |              |                                                                                                                                                                                                                                                                                                         |            |            |             |            |            |            |           |          |              |           |              |              |                                                                                                                                                                                                                                                                                                        |            |            |            |            |            |            |           |          |              |            |              |              |                                                                                                                                                                                                                                                                                                          |            |            |             |            |            |              |          |            |              |            |              |              |
| PDAC (77)                                                                                                                                                                                                                                                                                               | NoPDAC (78)  | Normal (136) |            |            |            |            |          |          |              |           |              |              |                                                                                                                                                                                                                                                                                                         |            |            |             |            |            |             |          |           |              |            |              |              |                                                                                                                                                                                                                                                                                                         |            |            |             |            |            |            |           |          |              |           |              |              |                                                                                                                                                                                                                                                                                                        |            |            |            |            |            |            |           |          |              |            |              |              |                                                                                                                                                                                                                                                                                                          |            |            |             |            |            |              |          |            |              |            |              |              |
| 77 (70.4%)                                                                                                                                                                                                                                                                                              | 20 (18.5%)   | 12 (11.1%)   |            |            |            |            |          |          |              |           |              |              |                                                                                                                                                                                                                                                                                                         |            |            |             |            |            |             |          |           |              |            |              |              |                                                                                                                                                                                                                                                                                                         |            |            |             |            |            |            |           |          |              |           |              |              |                                                                                                                                                                                                                                                                                                        |            |            |            |            |            |            |           |          |              |            |              |              |                                                                                                                                                                                                                                                                                                          |            |            |             |            |            |              |          |            |              |            |              |              |
| 14 (12.6%)                                                                                                                                                                                                                                                                                              | 21 (19.3%)   | 10 (9.3%)    |            |            |            |            |          |          |              |           |              |              |                                                                                                                                                                                                                                                                                                         |            |            |             |            |            |             |          |           |              |            |              |              |                                                                                                                                                                                                                                                                                                         |            |            |             |            |            |            |           |          |              |           |              |              |                                                                                                                                                                                                                                                                                                        |            |            |            |            |            |            |           |          |              |            |              |              |                                                                                                                                                                                                                                                                                                          |            |            |             |            |            |              |          |            |              |            |              |              |
| 1 (0.9%)                                                                                                                                                                                                                                                                                                | 8 (7.4%)     | 102 (92.9%)  |            |            |            |            |          |          |              |           |              |              |                                                                                                                                                                                                                                                                                                         |            |            |             |            |            |             |          |           |              |            |              |              |                                                                                                                                                                                                                                                                                                         |            |            |             |            |            |            |           |          |              |           |              |              |                                                                                                                                                                                                                                                                                                        |            |            |            |            |            |            |           |          |              |            |              |              |                                                                                                                                                                                                                                                                                                          |            |            |             |            |            |              |          |            |              |            |              |              |
| PDAC (83)                                                                                                                                                                                                                                                                                               | NoPDAC (71)  | Normal (127) |            |            |            |            |          |          |              |           |              |              |                                                                                                                                                                                                                                                                                                         |            |            |             |            |            |             |          |           |              |            |              |              |                                                                                                                                                                                                                                                                                                         |            |            |             |            |            |            |           |          |              |           |              |              |                                                                                                                                                                                                                                                                                                        |            |            |            |            |            |            |           |          |              |            |              |              |                                                                                                                                                                                                                                                                                                          |            |            |             |            |            |              |          |            |              |            |              |              |
| <table border="1"> <tr><td>16 (80.2%)</td><td>24 (22.2%)</td><td>19 (17.6%)</td></tr> <tr><td>14 (20.0%)</td><td>41 (38.9%)</td><td>9 (8.3%)</td></tr> <tr><td>1 (0.9%)</td><td>8 (7.6%)</td><td>107 (100.0%)</td></tr> <tr><td>PDAC (80)</td><td>NoPDAC (79)</td><td>Normal (130)</td></tr> </table>   | 16 (80.2%)   | 24 (22.2%)   | 19 (17.6%) | 14 (20.0%) | 41 (38.9%) | 9 (8.3%)   | 1 (0.9%) | 8 (7.6%) | 107 (100.0%) | PDAC (80) | NoPDAC (79)  | Normal (130) | <table border="1"> <tr><td>10 (49.1%)</td><td>21 (28.7%)</td><td>28 (23.1%)</td></tr> <tr><td>7 (32.3%)</td><td>11 (14.9%)</td><td>11 (8.6%)</td></tr> <tr><td>0 (0.0%)</td><td>0 (0.0%)</td><td>116 (100.0%)</td></tr> <tr><td>PDAC (57)</td><td>NoPDAC (82)</td><td>Normal (152)</td></tr> </table>   | 10 (49.1%) | 21 (28.7%) | 28 (23.1%)  | 7 (32.3%)  | 11 (14.9%) | 11 (8.6%)   | 0 (0.0%) | 0 (0.0%)  | 116 (100.0%) | PDAC (57)  | NoPDAC (82)  | Normal (152) | <table border="1"> <tr><td>38 (35.2%)</td><td>17 (15.7%)</td><td>12 (11.1%)</td></tr> <tr><td>28 (26.1%)</td><td>24 (22.4%)</td><td>17 (15.7%)</td></tr> <tr><td>0 (0.0%)</td><td>0 (0.0%)</td><td>116 (100.0%)</td></tr> <tr><td>PDAC (64)</td><td>NoPDAC (41)</td><td>Normal (186)</td></tr> </table> | 38 (35.2%) | 17 (15.7%) | 12 (11.1%)  | 28 (26.1%) | 24 (22.4%) | 17 (15.7%) | 0 (0.0%)  | 0 (0.0%) | 116 (100.0%) | PDAC (64) | NoPDAC (41)  | Normal (186) | <table border="1"> <tr><td>13 (76.9%)</td><td>15 (13.9%)</td><td>10 (9.3%)</td></tr> <tr><td>16 (22.4%)</td><td>45 (41.5%)</td><td>4 (3.7%)</td></tr> <tr><td>18 (8.6%)</td><td>8 (7.4%)</td><td>106 (97.4%)</td></tr> <tr><td>PDAC (108)</td><td>NoPDAC (83)</td><td>Normal (120)</td></tr> </table>  | 13 (76.9%) | 15 (13.9%) | 10 (9.3%)  | 16 (22.4%) | 45 (41.5%) | 4 (3.7%)   | 18 (8.6%) | 8 (7.4%) | 106 (97.4%)  | PDAC (108) | NoPDAC (83)  | Normal (120) | <table border="1"> <tr><td>18 (16.7%)</td><td>18 (16.7%)</td><td>32 (28.9%)</td></tr> <tr><td>0 (0.0%)</td><td>0 (0.0%)</td><td>11 (9.3%)</td></tr> <tr><td>1 (0.9%)</td><td>17 (14.7%)</td><td>81 (68.4%)</td></tr> <tr><td>PDAC (25)</td><td>NoPDAC (128)</td><td>Normal (136)</td></tr> </table>      | 18 (16.7%) | 18 (16.7%) | 32 (28.9%)  | 0 (0.0%)   | 0 (0.0%)   | 11 (9.3%)    | 1 (0.9%) | 17 (14.7%) | 81 (68.4%)   | PDAC (25)  | NoPDAC (128) | Normal (136) |
| 16 (80.2%)                                                                                                                                                                                                                                                                                              | 24 (22.2%)   | 19 (17.6%)   |            |            |            |            |          |          |              |           |              |              |                                                                                                                                                                                                                                                                                                         |            |            |             |            |            |             |          |           |              |            |              |              |                                                                                                                                                                                                                                                                                                         |            |            |             |            |            |            |           |          |              |           |              |              |                                                                                                                                                                                                                                                                                                        |            |            |            |            |            |            |           |          |              |            |              |              |                                                                                                                                                                                                                                                                                                          |            |            |             |            |            |              |          |            |              |            |              |              |
| 14 (20.0%)                                                                                                                                                                                                                                                                                              | 41 (38.9%)   | 9 (8.3%)     |            |            |            |            |          |          |              |           |              |              |                                                                                                                                                                                                                                                                                                         |            |            |             |            |            |             |          |           |              |            |              |              |                                                                                                                                                                                                                                                                                                         |            |            |             |            |            |            |           |          |              |           |              |              |                                                                                                                                                                                                                                                                                                        |            |            |            |            |            |            |           |          |              |            |              |              |                                                                                                                                                                                                                                                                                                          |            |            |             |            |            |              |          |            |              |            |              |              |
| 1 (0.9%)                                                                                                                                                                                                                                                                                                | 8 (7.6%)     | 107 (100.0%) |            |            |            |            |          |          |              |           |              |              |                                                                                                                                                                                                                                                                                                         |            |            |             |            |            |             |          |           |              |            |              |              |                                                                                                                                                                                                                                                                                                         |            |            |             |            |            |            |           |          |              |           |              |              |                                                                                                                                                                                                                                                                                                        |            |            |            |            |            |            |           |          |              |            |              |              |                                                                                                                                                                                                                                                                                                          |            |            |             |            |            |              |          |            |              |            |              |              |
| PDAC (80)                                                                                                                                                                                                                                                                                               | NoPDAC (79)  | Normal (130) |            |            |            |            |          |          |              |           |              |              |                                                                                                                                                                                                                                                                                                         |            |            |             |            |            |             |          |           |              |            |              |              |                                                                                                                                                                                                                                                                                                         |            |            |             |            |            |            |           |          |              |           |              |              |                                                                                                                                                                                                                                                                                                        |            |            |            |            |            |            |           |          |              |            |              |              |                                                                                                                                                                                                                                                                                                          |            |            |             |            |            |              |          |            |              |            |              |              |
| 10 (49.1%)                                                                                                                                                                                                                                                                                              | 21 (28.7%)   | 28 (23.1%)   |            |            |            |            |          |          |              |           |              |              |                                                                                                                                                                                                                                                                                                         |            |            |             |            |            |             |          |           |              |            |              |              |                                                                                                                                                                                                                                                                                                         |            |            |             |            |            |            |           |          |              |           |              |              |                                                                                                                                                                                                                                                                                                        |            |            |            |            |            |            |           |          |              |            |              |              |                                                                                                                                                                                                                                                                                                          |            |            |             |            |            |              |          |            |              |            |              |              |
| 7 (32.3%)                                                                                                                                                                                                                                                                                               | 11 (14.9%)   | 11 (8.6%)    |            |            |            |            |          |          |              |           |              |              |                                                                                                                                                                                                                                                                                                         |            |            |             |            |            |             |          |           |              |            |              |              |                                                                                                                                                                                                                                                                                                         |            |            |             |            |            |            |           |          |              |           |              |              |                                                                                                                                                                                                                                                                                                        |            |            |            |            |            |            |           |          |              |            |              |              |                                                                                                                                                                                                                                                                                                          |            |            |             |            |            |              |          |            |              |            |              |              |
| 0 (0.0%)                                                                                                                                                                                                                                                                                                | 0 (0.0%)     | 116 (100.0%) |            |            |            |            |          |          |              |           |              |              |                                                                                                                                                                                                                                                                                                         |            |            |             |            |            |             |          |           |              |            |              |              |                                                                                                                                                                                                                                                                                                         |            |            |             |            |            |            |           |          |              |           |              |              |                                                                                                                                                                                                                                                                                                        |            |            |            |            |            |            |           |          |              |            |              |              |                                                                                                                                                                                                                                                                                                          |            |            |             |            |            |              |          |            |              |            |              |              |
| PDAC (57)                                                                                                                                                                                                                                                                                               | NoPDAC (82)  | Normal (152) |            |            |            |            |          |          |              |           |              |              |                                                                                                                                                                                                                                                                                                         |            |            |             |            |            |             |          |           |              |            |              |              |                                                                                                                                                                                                                                                                                                         |            |            |             |            |            |            |           |          |              |           |              |              |                                                                                                                                                                                                                                                                                                        |            |            |            |            |            |            |           |          |              |            |              |              |                                                                                                                                                                                                                                                                                                          |            |            |             |            |            |              |          |            |              |            |              |              |
| 38 (35.2%)                                                                                                                                                                                                                                                                                              | 17 (15.7%)   | 12 (11.1%)   |            |            |            |            |          |          |              |           |              |              |                                                                                                                                                                                                                                                                                                         |            |            |             |            |            |             |          |           |              |            |              |              |                                                                                                                                                                                                                                                                                                         |            |            |             |            |            |            |           |          |              |           |              |              |                                                                                                                                                                                                                                                                                                        |            |            |            |            |            |            |           |          |              |            |              |              |                                                                                                                                                                                                                                                                                                          |            |            |             |            |            |              |          |            |              |            |              |              |
| 28 (26.1%)                                                                                                                                                                                                                                                                                              | 24 (22.4%)   | 17 (15.7%)   |            |            |            |            |          |          |              |           |              |              |                                                                                                                                                                                                                                                                                                         |            |            |             |            |            |             |          |           |              |            |              |              |                                                                                                                                                                                                                                                                                                         |            |            |             |            |            |            |           |          |              |           |              |              |                                                                                                                                                                                                                                                                                                        |            |            |            |            |            |            |           |          |              |            |              |              |                                                                                                                                                                                                                                                                                                          |            |            |             |            |            |              |          |            |              |            |              |              |
| 0 (0.0%)                                                                                                                                                                                                                                                                                                | 0 (0.0%)     | 116 (100.0%) |            |            |            |            |          |          |              |           |              |              |                                                                                                                                                                                                                                                                                                         |            |            |             |            |            |             |          |           |              |            |              |              |                                                                                                                                                                                                                                                                                                         |            |            |             |            |            |            |           |          |              |           |              |              |                                                                                                                                                                                                                                                                                                        |            |            |            |            |            |            |           |          |              |            |              |              |                                                                                                                                                                                                                                                                                                          |            |            |             |            |            |              |          |            |              |            |              |              |
| PDAC (64)                                                                                                                                                                                                                                                                                               | NoPDAC (41)  | Normal (186) |            |            |            |            |          |          |              |           |              |              |                                                                                                                                                                                                                                                                                                         |            |            |             |            |            |             |          |           |              |            |              |              |                                                                                                                                                                                                                                                                                                         |            |            |             |            |            |            |           |          |              |           |              |              |                                                                                                                                                                                                                                                                                                        |            |            |            |            |            |            |           |          |              |            |              |              |                                                                                                                                                                                                                                                                                                          |            |            |             |            |            |              |          |            |              |            |              |              |
| 13 (76.9%)                                                                                                                                                                                                                                                                                              | 15 (13.9%)   | 10 (9.3%)    |            |            |            |            |          |          |              |           |              |              |                                                                                                                                                                                                                                                                                                         |            |            |             |            |            |             |          |           |              |            |              |              |                                                                                                                                                                                                                                                                                                         |            |            |             |            |            |            |           |          |              |           |              |              |                                                                                                                                                                                                                                                                                                        |            |            |            |            |            |            |           |          |              |            |              |              |                                                                                                                                                                                                                                                                                                          |            |            |             |            |            |              |          |            |              |            |              |              |
| 16 (22.4%)                                                                                                                                                                                                                                                                                              | 45 (41.5%)   | 4 (3.7%)     |            |            |            |            |          |          |              |           |              |              |                                                                                                                                                                                                                                                                                                         |            |            |             |            |            |             |          |           |              |            |              |              |                                                                                                                                                                                                                                                                                                         |            |            |             |            |            |            |           |          |              |           |              |              |                                                                                                                                                                                                                                                                                                        |            |            |            |            |            |            |           |          |              |            |              |              |                                                                                                                                                                                                                                                                                                          |            |            |             |            |            |              |          |            |              |            |              |              |
| 18 (8.6%)                                                                                                                                                                                                                                                                                               | 8 (7.4%)     | 106 (97.4%)  |            |            |            |            |          |          |              |           |              |              |                                                                                                                                                                                                                                                                                                         |            |            |             |            |            |             |          |           |              |            |              |              |                                                                                                                                                                                                                                                                                                         |            |            |             |            |            |            |           |          |              |           |              |              |                                                                                                                                                                                                                                                                                                        |            |            |            |            |            |            |           |          |              |            |              |              |                                                                                                                                                                                                                                                                                                          |            |            |             |            |            |              |          |            |              |            |              |              |
| PDAC (108)                                                                                                                                                                                                                                                                                              | NoPDAC (83)  | Normal (120) |            |            |            |            |          |          |              |           |              |              |                                                                                                                                                                                                                                                                                                         |            |            |             |            |            |             |          |           |              |            |              |              |                                                                                                                                                                                                                                                                                                         |            |            |             |            |            |            |           |          |              |           |              |              |                                                                                                                                                                                                                                                                                                        |            |            |            |            |            |            |           |          |              |            |              |              |                                                                                                                                                                                                                                                                                                          |            |            |             |            |            |              |          |            |              |            |              |              |
| 18 (16.7%)                                                                                                                                                                                                                                                                                              | 18 (16.7%)   | 32 (28.9%)   |            |            |            |            |          |          |              |           |              |              |                                                                                                                                                                                                                                                                                                         |            |            |             |            |            |             |          |           |              |            |              |              |                                                                                                                                                                                                                                                                                                         |            |            |             |            |            |            |           |          |              |           |              |              |                                                                                                                                                                                                                                                                                                        |            |            |            |            |            |            |           |          |              |            |              |              |                                                                                                                                                                                                                                                                                                          |            |            |             |            |            |              |          |            |              |            |              |              |
| 0 (0.0%)                                                                                                                                                                                                                                                                                                | 0 (0.0%)     | 11 (9.3%)    |            |            |            |            |          |          |              |           |              |              |                                                                                                                                                                                                                                                                                                         |            |            |             |            |            |             |          |           |              |            |              |              |                                                                                                                                                                                                                                                                                                         |            |            |             |            |            |            |           |          |              |           |              |              |                                                                                                                                                                                                                                                                                                        |            |            |            |            |            |            |           |          |              |            |              |              |                                                                                                                                                                                                                                                                                                          |            |            |             |            |            |              |          |            |              |            |              |              |
| 1 (0.9%)                                                                                                                                                                                                                                                                                                | 17 (14.7%)   | 81 (68.4%)   |            |            |            |            |          |          |              |           |              |              |                                                                                                                                                                                                                                                                                                         |            |            |             |            |            |             |          |           |              |            |              |              |                                                                                                                                                                                                                                                                                                         |            |            |             |            |            |            |           |          |              |           |              |              |                                                                                                                                                                                                                                                                                                        |            |            |            |            |            |            |           |          |              |            |              |              |                                                                                                                                                                                                                                                                                                          |            |            |             |            |            |              |          |            |              |            |              |              |
| PDAC (25)                                                                                                                                                                                                                                                                                               | NoPDAC (128) | Normal (136) |            |            |            |            |          |          |              |           |              |              |                                                                                                                                                                                                                                                                                                         |            |            |             |            |            |             |          |           |              |            |              |              |                                                                                                                                                                                                                                                                                                         |            |            |             |            |            |            |           |          |              |           |              |              |                                                                                                                                                                                                                                                                                                        |            |            |            |            |            |            |           |          |              |            |              |              |                                                                                                                                                                                                                                                                                                          |            |            |             |            |            |              |          |            |              |            |              |              |
| <table border="1"> <tr><td>44 (40.7%)</td><td>33 (30.6%)</td><td>31 (28.7%)</td></tr> <tr><td>17 (26.4%)</td><td>30 (28.3%)</td><td>12 (11.3%)</td></tr> <tr><td>0 (0.0%)</td><td>4 (3.4%)</td><td>112 (94.6%)</td></tr> <tr><td>PDAC (61)</td><td>NoPDAC (75)</td><td>Normal (150)</td></tr> </table>  | 44 (40.7%)   | 33 (30.6%)   | 31 (28.7%) | 17 (26.4%) | 30 (28.3%) | 12 (11.3%) | 0 (0.0%) | 4 (3.4%) | 112 (94.6%)  | PDAC (61) | NoPDAC (75)  | Normal (150) | <table border="1"> <tr><td>30 (27.8%)</td><td>45 (41.7%)</td><td>33 (30.6%)</td></tr> <tr><td>3 (2.8%)</td><td>50 (46.3%)</td><td>14 (13.0%)</td></tr> <tr><td>1 (0.9%)</td><td>10 (9.3%)</td><td>108 (100.0%)</td></tr> <tr><td>PDAC (34)</td><td>NoPDAC (105)</td><td>Normal (132)</td></tr> </table> | 30 (27.8%) | 45 (41.7%) | 33 (30.6%)  | 3 (2.8%)   | 50 (46.3%) | 14 (13.0%)  | 1 (0.9%) | 10 (9.3%) | 108 (100.0%) | PDAC (34)  | NoPDAC (105) | Normal (132) | <table border="1"> <tr><td>10 (45.5%)</td><td>16 (14.8%)</td><td>21 (19.3%)</td></tr> <tr><td>8 (36.4%)</td><td>10 (9.3%)</td><td>9 (8.3%)</td></tr> <tr><td>5 (22.7%)</td><td>8 (7.4%)</td><td>103 (92.9%)</td></tr> <tr><td>PDAC (82)</td><td>NoPDAC (74)</td><td>Normal (135)</td></tr> </table>     | 10 (45.5%) | 16 (14.8%) | 21 (19.3%)  | 8 (36.4%)  | 10 (9.3%)  | 9 (8.3%)   | 5 (22.7%) | 8 (7.4%) | 103 (92.9%)  | PDAC (82) | NoPDAC (74)  | Normal (135) | <table border="1"> <tr><td>70 (64.8%)</td><td>8 (7.4%)</td><td>30 (27.8%)</td></tr> <tr><td>15 (22.4%)</td><td>37 (34.2%)</td><td>15 (13.9%)</td></tr> <tr><td>3 (2.8%)</td><td>0 (0.0%)</td><td>113 (103.4%)</td></tr> <tr><td>PDAC (86)</td><td>NoPDAC (145)</td><td>Normal (158)</td></tr> </table> | 70 (64.8%) | 8 (7.4%)   | 30 (27.8%) | 15 (22.4%) | 37 (34.2%) | 15 (13.9%) | 3 (2.8%)  | 0 (0.0%) | 113 (103.4%) | PDAC (86)  | NoPDAC (145) | Normal (158) | <table border="1"> <tr><td>77 (71.3%)</td><td>4 (3.7%)</td><td>27 (25.0%)</td></tr> <tr><td>1 (0.9%)</td><td>0 (0.0%)</td><td>115 (106.7%)</td></tr> <tr><td>0 (0.0%)</td><td>0 (0.0%)</td><td>115 (106.7%)</td></tr> <tr><td>PDAC (89)</td><td>NoPDAC (67)</td><td>Normal (155)</td></tr> </table>      | 77 (71.3%) | 4 (3.7%)   | 27 (25.0%)  | 1 (0.9%)   | 0 (0.0%)   | 115 (106.7%) | 0 (0.0%) | 0 (0.0%)   | 115 (106.7%) | PDAC (89)  | NoPDAC (67)  | Normal (155) |
| 44 (40.7%)                                                                                                                                                                                                                                                                                              | 33 (30.6%)   | 31 (28.7%)   |            |            |            |            |          |          |              |           |              |              |                                                                                                                                                                                                                                                                                                         |            |            |             |            |            |             |          |           |              |            |              |              |                                                                                                                                                                                                                                                                                                         |            |            |             |            |            |            |           |          |              |           |              |              |                                                                                                                                                                                                                                                                                                        |            |            |            |            |            |            |           |          |              |            |              |              |                                                                                                                                                                                                                                                                                                          |            |            |             |            |            |              |          |            |              |            |              |              |
| 17 (26.4%)                                                                                                                                                                                                                                                                                              | 30 (28.3%)   | 12 (11.3%)   |            |            |            |            |          |          |              |           |              |              |                                                                                                                                                                                                                                                                                                         |            |            |             |            |            |             |          |           |              |            |              |              |                                                                                                                                                                                                                                                                                                         |            |            |             |            |            |            |           |          |              |           |              |              |                                                                                                                                                                                                                                                                                                        |            |            |            |            |            |            |           |          |              |            |              |              |                                                                                                                                                                                                                                                                                                          |            |            |             |            |            |              |          |            |              |            |              |              |
| 0 (0.0%)                                                                                                                                                                                                                                                                                                | 4 (3.4%)     | 112 (94.6%)  |            |            |            |            |          |          |              |           |              |              |                                                                                                                                                                                                                                                                                                         |            |            |             |            |            |             |          |           |              |            |              |              |                                                                                                                                                                                                                                                                                                         |            |            |             |            |            |            |           |          |              |           |              |              |                                                                                                                                                                                                                                                                                                        |            |            |            |            |            |            |           |          |              |            |              |              |                                                                                                                                                                                                                                                                                                          |            |            |             |            |            |              |          |            |              |            |              |              |
| PDAC (61)                                                                                                                                                                                                                                                                                               | NoPDAC (75)  | Normal (150) |            |            |            |            |          |          |              |           |              |              |                                                                                                                                                                                                                                                                                                         |            |            |             |            |            |             |          |           |              |            |              |              |                                                                                                                                                                                                                                                                                                         |            |            |             |            |            |            |           |          |              |           |              |              |                                                                                                                                                                                                                                                                                                        |            |            |            |            |            |            |           |          |              |            |              |              |                                                                                                                                                                                                                                                                                                          |            |            |             |            |            |              |          |            |              |            |              |              |
| 30 (27.8%)                                                                                                                                                                                                                                                                                              | 45 (41.7%)   | 33 (30.6%)   |            |            |            |            |          |          |              |           |              |              |                                                                                                                                                                                                                                                                                                         |            |            |             |            |            |             |          |           |              |            |              |              |                                                                                                                                                                                                                                                                                                         |            |            |             |            |            |            |           |          |              |           |              |              |                                                                                                                                                                                                                                                                                                        |            |            |            |            |            |            |           |          |              |            |              |              |                                                                                                                                                                                                                                                                                                          |            |            |             |            |            |              |          |            |              |            |              |              |
| 3 (2.8%)                                                                                                                                                                                                                                                                                                | 50 (46.3%)   | 14 (13.0%)   |            |            |            |            |          |          |              |           |              |              |                                                                                                                                                                                                                                                                                                         |            |            |             |            |            |             |          |           |              |            |              |              |                                                                                                                                                                                                                                                                                                         |            |            |             |            |            |            |           |          |              |           |              |              |                                                                                                                                                                                                                                                                                                        |            |            |            |            |            |            |           |          |              |            |              |              |                                                                                                                                                                                                                                                                                                          |            |            |             |            |            |              |          |            |              |            |              |              |
| 1 (0.9%)                                                                                                                                                                                                                                                                                                | 10 (9.3%)    | 108 (100.0%) |            |            |            |            |          |          |              |           |              |              |                                                                                                                                                                                                                                                                                                         |            |            |             |            |            |             |          |           |              |            |              |              |                                                                                                                                                                                                                                                                                                         |            |            |             |            |            |            |           |          |              |           |              |              |                                                                                                                                                                                                                                                                                                        |            |            |            |            |            |            |           |          |              |            |              |              |                                                                                                                                                                                                                                                                                                          |            |            |             |            |            |              |          |            |              |            |              |              |
| PDAC (34)                                                                                                                                                                                                                                                                                               | NoPDAC (105) | Normal (132) |            |            |            |            |          |          |              |           |              |              |                                                                                                                                                                                                                                                                                                         |            |            |             |            |            |             |          |           |              |            |              |              |                                                                                                                                                                                                                                                                                                         |            |            |             |            |            |            |           |          |              |           |              |              |                                                                                                                                                                                                                                                                                                        |            |            |            |            |            |            |           |          |              |            |              |              |                                                                                                                                                                                                                                                                                                          |            |            |             |            |            |              |          |            |              |            |              |              |
| 10 (45.5%)                                                                                                                                                                                                                                                                                              | 16 (14.8%)   | 21 (19.3%)   |            |            |            |            |          |          |              |           |              |              |                                                                                                                                                                                                                                                                                                         |            |            |             |            |            |             |          |           |              |            |              |              |                                                                                                                                                                                                                                                                                                         |            |            |             |            |            |            |           |          |              |           |              |              |                                                                                                                                                                                                                                                                                                        |            |            |            |            |            |            |           |          |              |            |              |              |                                                                                                                                                                                                                                                                                                          |            |            |             |            |            |              |          |            |              |            |              |              |
| 8 (36.4%)                                                                                                                                                                                                                                                                                               | 10 (9.3%)    | 9 (8.3%)     |            |            |            |            |          |          |              |           |              |              |                                                                                                                                                                                                                                                                                                         |            |            |             |            |            |             |          |           |              |            |              |              |                                                                                                                                                                                                                                                                                                         |            |            |             |            |            |            |           |          |              |           |              |              |                                                                                                                                                                                                                                                                                                        |            |            |            |            |            |            |           |          |              |            |              |              |                                                                                                                                                                                                                                                                                                          |            |            |             |            |            |              |          |            |              |            |              |              |
| 5 (22.7%)                                                                                                                                                                                                                                                                                               | 8 (7.4%)     | 103 (92.9%)  |            |            |            |            |          |          |              |           |              |              |                                                                                                                                                                                                                                                                                                         |            |            |             |            |            |             |          |           |              |            |              |              |                                                                                                                                                                                                                                                                                                         |            |            |             |            |            |            |           |          |              |           |              |              |                                                                                                                                                                                                                                                                                                        |            |            |            |            |            |            |           |          |              |            |              |              |                                                                                                                                                                                                                                                                                                          |            |            |             |            |            |              |          |            |              |            |              |              |
| PDAC (82)                                                                                                                                                                                                                                                                                               | NoPDAC (74)  | Normal (135) |            |            |            |            |          |          |              |           |              |              |                                                                                                                                                                                                                                                                                                         |            |            |             |            |            |             |          |           |              |            |              |              |                                                                                                                                                                                                                                                                                                         |            |            |             |            |            |            |           |          |              |           |              |              |                                                                                                                                                                                                                                                                                                        |            |            |            |            |            |            |           |          |              |            |              |              |                                                                                                                                                                                                                                                                                                          |            |            |             |            |            |              |          |            |              |            |              |              |
| 70 (64.8%)                                                                                                                                                                                                                                                                                              | 8 (7.4%)     | 30 (27.8%)   |            |            |            |            |          |          |              |           |              |              |                                                                                                                                                                                                                                                                                                         |            |            |             |            |            |             |          |           |              |            |              |              |                                                                                                                                                                                                                                                                                                         |            |            |             |            |            |            |           |          |              |           |              |              |                                                                                                                                                                                                                                                                                                        |            |            |            |            |            |            |           |          |              |            |              |              |                                                                                                                                                                                                                                                                                                          |            |            |             |            |            |              |          |            |              |            |              |              |
| 15 (22.4%)                                                                                                                                                                                                                                                                                              | 37 (34.2%)   | 15 (13.9%)   |            |            |            |            |          |          |              |           |              |              |                                                                                                                                                                                                                                                                                                         |            |            |             |            |            |             |          |           |              |            |              |              |                                                                                                                                                                                                                                                                                                         |            |            |             |            |            |            |           |          |              |           |              |              |                                                                                                                                                                                                                                                                                                        |            |            |            |            |            |            |           |          |              |            |              |              |                                                                                                                                                                                                                                                                                                          |            |            |             |            |            |              |          |            |              |            |              |              |
| 3 (2.8%)                                                                                                                                                                                                                                                                                                | 0 (0.0%)     | 113 (103.4%) |            |            |            |            |          |          |              |           |              |              |                                                                                                                                                                                                                                                                                                         |            |            |             |            |            |             |          |           |              |            |              |              |                                                                                                                                                                                                                                                                                                         |            |            |             |            |            |            |           |          |              |           |              |              |                                                                                                                                                                                                                                                                                                        |            |            |            |            |            |            |           |          |              |            |              |              |                                                                                                                                                                                                                                                                                                          |            |            |             |            |            |              |          |            |              |            |              |              |
| PDAC (86)                                                                                                                                                                                                                                                                                               | NoPDAC (145) | Normal (158) |            |            |            |            |          |          |              |           |              |              |                                                                                                                                                                                                                                                                                                         |            |            |             |            |            |             |          |           |              |            |              |              |                                                                                                                                                                                                                                                                                                         |            |            |             |            |            |            |           |          |              |           |              |              |                                                                                                                                                                                                                                                                                                        |            |            |            |            |            |            |           |          |              |            |              |              |                                                                                                                                                                                                                                                                                                          |            |            |             |            |            |              |          |            |              |            |              |              |
| 77 (71.3%)                                                                                                                                                                                                                                                                                              | 4 (3.7%)     | 27 (25.0%)   |            |            |            |            |          |          |              |           |              |              |                                                                                                                                                                                                                                                                                                         |            |            |             |            |            |             |          |           |              |            |              |              |                                                                                                                                                                                                                                                                                                         |            |            |             |            |            |            |           |          |              |           |              |              |                                                                                                                                                                                                                                                                                                        |            |            |            |            |            |            |           |          |              |            |              |              |                                                                                                                                                                                                                                                                                                          |            |            |             |            |            |              |          |            |              |            |              |              |
| 1 (0.9%)                                                                                                                                                                                                                                                                                                | 0 (0.0%)     | 115 (106.7%) |            |            |            |            |          |          |              |           |              |              |                                                                                                                                                                                                                                                                                                         |            |            |             |            |            |             |          |           |              |            |              |              |                                                                                                                                                                                                                                                                                                         |            |            |             |            |            |            |           |          |              |           |              |              |                                                                                                                                                                                                                                                                                                        |            |            |            |            |            |            |           |          |              |            |              |              |                                                                                                                                                                                                                                                                                                          |            |            |             |            |            |              |          |            |              |            |              |              |
| 0 (0.0%)                                                                                                                                                                                                                                                                                                | 0 (0.0%)     | 115 (106.7%) |            |            |            |            |          |          |              |           |              |              |                                                                                                                                                                                                                                                                                                         |            |            |             |            |            |             |          |           |              |            |              |              |                                                                                                                                                                                                                                                                                                         |            |            |             |            |            |            |           |          |              |           |              |              |                                                                                                                                                                                                                                                                                                        |            |            |            |            |            |            |           |          |              |            |              |              |                                                                                                                                                                                                                                                                                                          |            |            |             |            |            |              |          |            |              |            |              |              |
| PDAC (89)                                                                                                                                                                                                                                                                                               | NoPDAC (67)  | Normal (155) |            |            |            |            |          |          |              |           |              |              |                                                                                                                                                                                                                                                                                                         |            |            |             |            |            |             |          |           |              |            |              |              |                                                                                                                                                                                                                                                                                                         |            |            |             |            |            |            |           |          |              |           |              |              |                                                                                                                                                                                                                                                                                                        |            |            |            |            |            |            |           |          |              |            |              |              |                                                                                                                                                                                                                                                                                                          |            |            |             |            |            |              |          |            |              |            |              |              |
| <table border="1"> <tr><td>10 (11.5%)</td><td>19 (17.8%)</td><td>21 (19.4%)</td></tr> <tr><td>8 (11.5%)</td><td>40 (37.2%)</td><td>14 (12.9%)</td></tr> <tr><td>1 (0.9%)</td><td>6 (5.6%)</td><td>115 (105.3%)</td></tr> <tr><td>PDAC (77)</td><td>NoPDAC (64)</td><td>Normal (151)</td></tr> </table>  | 10 (11.5%)   | 19 (17.8%)   | 21 (19.4%) | 8 (11.5%)  | 40 (37.2%) | 14 (12.9%) | 1 (0.9%) | 6 (5.6%) | 115 (105.3%) | PDAC (77) | NoPDAC (64)  | Normal (151) | <table border="1"> <tr><td>45 (42.6%)</td><td>21 (19.4%)</td><td>41 (38.0%)</td></tr> <tr><td>18 (17.1%)</td><td>31 (28.5%)</td><td>15 (14.1%)</td></tr> <tr><td>5 (4.7%)</td><td>1 (0.9%)</td><td>110 (101.7%)</td></tr> <tr><td>PDAC (89)</td><td>NoPDAC (53)</td><td>Normal (158)</td></tr> </table> | 45 (42.6%) | 21 (19.4%) | 41 (38.0%)  | 18 (17.1%) | 31 (28.5%) | 15 (14.1%)  | 5 (4.7%) | 1 (0.9%)  | 110 (101.7%) | PDAC (89)  | NoPDAC (53)  | Normal (158) | <table border="1"> <tr><td>10 (45.5%)</td><td>11 (10.2%)</td><td>33 (30.6%)</td></tr> <tr><td>29 (43.5%)</td><td>20 (26.9%)</td><td>18 (26.9%)</td></tr> <tr><td>3 (2.8%)</td><td>0 (0.0%)</td><td>113 (107.4%)</td></tr> <tr><td>PDAC (96)</td><td>NoPDAC (31)</td><td>Normal (154)</td></tr> </table> | 10 (45.5%) | 11 (10.2%) | 33 (30.6%)  | 29 (43.5%) | 20 (26.9%) | 18 (26.9%) | 3 (2.8%)  | 0 (0.0%) | 113 (107.4%) | PDAC (96) | NoPDAC (31)  | Normal (154) | <td></td> <td></td> <td></td>                                                                                                                                                                                                                                                                          |            |            |            |            |            |            |           |          |              |            |              |              |                                                                                                                                                                                                                                                                                                          |            |            |             |            |            |              |          |            |              |            |              |              |
| 10 (11.5%)                                                                                                                                                                                                                                                                                              | 19 (17.8%)   | 21 (19.4%)   |            |            |            |            |          |          |              |           |              |              |                                                                                                                                                                                                                                                                                                         |            |            |             |            |            |             |          |           |              |            |              |              |                                                                                                                                                                                                                                                                                                         |            |            |             |            |            |            |           |          |              |           |              |              |                                                                                                                                                                                                                                                                                                        |            |            |            |            |            |            |           |          |              |            |              |              |                                                                                                                                                                                                                                                                                                          |            |            |             |            |            |              |          |            |              |            |              |              |
| 8 (11.5%)                                                                                                                                                                                                                                                                                               | 40 (37.2%)   | 14 (12.9%)   |            |            |            |            |          |          |              |           |              |              |                                                                                                                                                                                                                                                                                                         |            |            |             |            |            |             |          |           |              |            |              |              |                                                                                                                                                                                                                                                                                                         |            |            |             |            |            |            |           |          |              |           |              |              |                                                                                                                                                                                                                                                                                                        |            |            |            |            |            |            |           |          |              |            |              |              |                                                                                                                                                                                                                                                                                                          |            |            |             |            |            |              |          |            |              |            |              |              |
| 1 (0.9%)                                                                                                                                                                                                                                                                                                | 6 (5.6%)     | 115 (105.3%) |            |            |            |            |          |          |              |           |              |              |                                                                                                                                                                                                                                                                                                         |            |            |             |            |            |             |          |           |              |            |              |              |                                                                                                                                                                                                                                                                                                         |            |            |             |            |            |            |           |          |              |           |              |              |                                                                                                                                                                                                                                                                                                        |            |            |            |            |            |            |           |          |              |            |              |              |                                                                                                                                                                                                                                                                                                          |            |            |             |            |            |              |          |            |              |            |              |              |
| PDAC (77)                                                                                                                                                                                                                                                                                               | NoPDAC (64)  | Normal (151) |            |            |            |            |          |          |              |           |              |              |                                                                                                                                                                                                                                                                                                         |            |            |             |            |            |             |          |           |              |            |              |              |                                                                                                                                                                                                                                                                                                         |            |            |             |            |            |            |           |          |              |           |              |              |                                                                                                                                                                                                                                                                                                        |            |            |            |            |            |            |           |          |              |            |              |              |                                                                                                                                                                                                                                                                                                          |            |            |             |            |            |              |          |            |              |            |              |              |
| 45 (42.6%)                                                                                                                                                                                                                                                                                              | 21 (19.4%)   | 41 (38.0%)   |            |            |            |            |          |          |              |           |              |              |                                                                                                                                                                                                                                                                                                         |            |            |             |            |            |             |          |           |              |            |              |              |                                                                                                                                                                                                                                                                                                         |            |            |             |            |            |            |           |          |              |           |              |              |                                                                                                                                                                                                                                                                                                        |            |            |            |            |            |            |           |          |              |            |              |              |                                                                                                                                                                                                                                                                                                          |            |            |             |            |            |              |          |            |              |            |              |              |
| 18 (17.1%)                                                                                                                                                                                                                                                                                              | 31 (28.5%)   | 15 (14.1%)   |            |            |            |            |          |          |              |           |              |              |                                                                                                                                                                                                                                                                                                         |            |            |             |            |            |             |          |           |              |            |              |              |                                                                                                                                                                                                                                                                                                         |            |            |             |            |            |            |           |          |              |           |              |              |                                                                                                                                                                                                                                                                                                        |            |            |            |            |            |            |           |          |              |            |              |              |                                                                                                                                                                                                                                                                                                          |            |            |             |            |            |              |          |            |              |            |              |              |
| 5 (4.7%)                                                                                                                                                                                                                                                                                                | 1 (0.9%)     | 110 (101.7%) |            |            |            |            |          |          |              |           |              |              |                                                                                                                                                                                                                                                                                                         |            |            |             |            |            |             |          |           |              |            |              |              |                                                                                                                                                                                                                                                                                                         |            |            |             |            |            |            |           |          |              |           |              |              |                                                                                                                                                                                                                                                                                                        |            |            |            |            |            |            |           |          |              |            |              |              |                                                                                                                                                                                                                                                                                                          |            |            |             |            |            |              |          |            |              |            |              |              |
| PDAC (89)                                                                                                                                                                                                                                                                                               | NoPDAC (53)  | Normal (158) |            |            |            |            |          |          |              |           |              |              |                                                                                                                                                                                                                                                                                                         |            |            |             |            |            |             |          |           |              |            |              |              |                                                                                                                                                                                                                                                                                                         |            |            |             |            |            |            |           |          |              |           |              |              |                                                                                                                                                                                                                                                                                                        |            |            |            |            |            |            |           |          |              |            |              |              |                                                                                                                                                                                                                                                                                                          |            |            |             |            |            |              |          |            |              |            |              |              |
| 10 (45.5%)                                                                                                                                                                                                                                                                                              | 11 (10.2%)   | 33 (30.6%)   |            |            |            |            |          |          |              |           |              |              |                                                                                                                                                                                                                                                                                                         |            |            |             |            |            |             |          |           |              |            |              |              |                                                                                                                                                                                                                                                                                                         |            |            |             |            |            |            |           |          |              |           |              |              |                                                                                                                                                                                                                                                                                                        |            |            |            |            |            |            |           |          |              |            |              |              |                                                                                                                                                                                                                                                                                                          |            |            |             |            |            |              |          |            |              |            |              |              |
| 29 (43.5%)                                                                                                                                                                                                                                                                                              | 20 (26.9%)   | 18 (26.9%)   |            |            |            |            |          |          |              |           |              |              |                                                                                                                                                                                                                                                                                                         |            |            |             |            |            |             |          |           |              |            |              |              |                                                                                                                                                                                                                                                                                                         |            |            |             |            |            |            |           |          |              |           |              |              |                                                                                                                                                                                                                                                                                                        |            |            |            |            |            |            |           |          |              |            |              |              |                                                                                                                                                                                                                                                                                                          |            |            |             |            |            |              |          |            |              |            |              |              |
| 3 (2.8%)                                                                                                                                                                                                                                                                                                | 0 (0.0%)     | 113 (107.4%) |            |            |            |            |          |          |              |           |              |              |                                                                                                                                                                                                                                                                                                         |            |            |             |            |            |             |          |           |              |            |              |              |                                                                                                                                                                                                                                                                                                         |            |            |             |            |            |            |           |          |              |           |              |              |                                                                                                                                                                                                                                                                                                        |            |            |            |            |            |            |           |          |              |            |              |              |                                                                                                                                                                                                                                                                                                          |            |            |             |            |            |              |          |            |              |            |              |              |
| PDAC (96)                                                                                                                                                                                                                                                                                               | NoPDAC (31)  | Normal (154) |            |            |            |            |          |          |              |           |              |              |                                                                                                                                                                                                                                                                                                         |            |            |             |            |            |             |          |           |              |            |              |              |                                                                                                                                                                                                                                                                                                         |            |            |             |            |            |            |           |          |              |           |              |              |                                                                                                                                                                                                                                                                                                        |            |            |            |            |            |            |           |          |              |            |              |              |                                                                                                                                                                                                                                                                                                          |            |            |             |            |            |              |          |            |              |            |              |              |

Supplementary Figure 2: Reader study of 33 readers on non-contrast CT for primary diagnosis (normal vs. PDAC vs. nonPDAC).



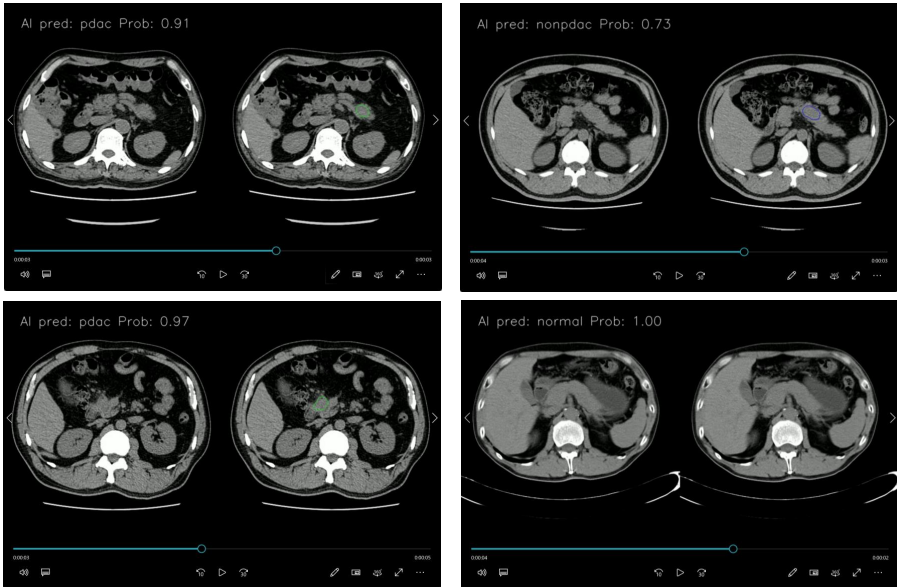

**Supplementary Figure 3:** Examples of the format of PANDA predictions that we provided to the readers in the first reader study, where reader reads the noncontrast CT with the assistance of PANDA. We generate videos that show the original CT images (left) and the contours of the lesion prediction. PDAC is marked in green contour and nonPDAC is marked in blue. We also show the prediction probability score of PANDA on the top left for reference. The readers can interactively view the CT images and the prediction by adjusting the scroll bar.

|                                                                                                                                                                                                                                                                                                                                                   |                               |                 |                 |               |              |             |                 |                 |            |               |               |               |                                                                                                                                                                                                                                                                                                                                                   |                               |               |               |               |              |             |             |                |            |               |               |                |                                                                                                                                                                                                                                                                                                                                                      |                               |               |               |               |              |             |             |                 |            |               |               |               |                                                                                                                                                                                                                                                                                                                                                     |                               |               |               |               |              |             |             |                 |            |               |               |               |                                                                                                                                                                                                                                                                                                                                                   |                               |             |               |               |              |             |             |                 |            |             |               |               |                                                                                                                                                                                                                                                                                                                                                   |                               |             |               |               |              |             |             |                 |            |             |               |               |
|---------------------------------------------------------------------------------------------------------------------------------------------------------------------------------------------------------------------------------------------------------------------------------------------------------------------------------------------------|-------------------------------|-----------------|-----------------|---------------|--------------|-------------|-----------------|-----------------|------------|---------------|---------------|---------------|---------------------------------------------------------------------------------------------------------------------------------------------------------------------------------------------------------------------------------------------------------------------------------------------------------------------------------------------------|-------------------------------|---------------|---------------|---------------|--------------|-------------|-------------|----------------|------------|---------------|---------------|----------------|------------------------------------------------------------------------------------------------------------------------------------------------------------------------------------------------------------------------------------------------------------------------------------------------------------------------------------------------------|-------------------------------|---------------|---------------|---------------|--------------|-------------|-------------|-----------------|------------|---------------|---------------|---------------|-----------------------------------------------------------------------------------------------------------------------------------------------------------------------------------------------------------------------------------------------------------------------------------------------------------------------------------------------------|-------------------------------|---------------|---------------|---------------|--------------|-------------|-------------|-----------------|------------|---------------|---------------|---------------|---------------------------------------------------------------------------------------------------------------------------------------------------------------------------------------------------------------------------------------------------------------------------------------------------------------------------------------------------|-------------------------------|-------------|---------------|---------------|--------------|-------------|-------------|-----------------|------------|-------------|---------------|---------------|---------------------------------------------------------------------------------------------------------------------------------------------------------------------------------------------------------------------------------------------------------------------------------------------------------------------------------------------------|-------------------------------|-------------|---------------|---------------|--------------|-------------|-------------|-----------------|------------|-------------|---------------|---------------|
| <table border="1"> <tr><td>Gold standard<br/>NonPDAC (97)</td><td>10<br/>(14.8%)</td><td>9<br/>(13.0%)</td><td>12<br/>(11.1%)</td></tr> <tr><td>Normal (116)</td><td>0<br/>(0.0%)</td><td>116<br/>(100.0%)</td><td>0</td></tr> <tr><td>PDAC (95)</td><td>10<br/>(10.5%)</td><td>9<br/>(9.5%)</td><td>12<br/>(12.6%)</td></tr> </table>            | Gold standard<br>NonPDAC (97) | 10<br>(14.8%)   | 9<br>(13.0%)    | 12<br>(11.1%) | Normal (116) | 0<br>(0.0%) | 116<br>(100.0%) | 0               | PDAC (95)  | 10<br>(10.5%) | 9<br>(9.5%)   | 12<br>(12.6%) | <table border="1"> <tr><td>Gold standard<br/>NonPDAC (97)</td><td>9<br/>(9.3%)</td><td>47<br/>(47.5%)</td><td>91<br/>(92.5%)</td></tr> <tr><td>Normal (116)</td><td>2<br/>(1.7%)</td><td>0<br/>(0.0%)</td><td>114<br/>(98.3%)</td></tr> <tr><td>PDAC (87)</td><td>9<br/>(10.3%)</td><td>47<br/>(54.0%)</td><td>91<br/>(104.0%)</td></tr> </table> | Gold standard<br>NonPDAC (97) | 9<br>(9.3%)   | 47<br>(47.5%) | 91<br>(92.5%) | Normal (116) | 2<br>(1.7%) | 0<br>(0.0%) | 114<br>(98.3%) | PDAC (87)  | 9<br>(10.3%)  | 47<br>(54.0%) | 91<br>(104.0%) | <table border="1"> <tr><td>Gold standard<br/>NonPDAC (87)</td><td>9<br/>(10.3%)</td><td>0<br/>(0.0%)</td><td>8<br/>(9.2%)</td></tr> <tr><td>Normal (116)</td><td>0<br/>(0.0%)</td><td>1<br/>(0.9%)</td><td>115<br/>(99.1%)</td></tr> <tr><td>PDAC (87)</td><td>9<br/>(10.3%)</td><td>0<br/>(0.0%)</td><td>8<br/>(9.2%)</td></tr> </table>            | Gold standard<br>NonPDAC (87) | 9<br>(10.3%)  | 0<br>(0.0%)   | 8<br>(9.2%)   | Normal (116) | 0<br>(0.0%) | 1<br>(0.9%) | 115<br>(99.1%)  | PDAC (87)  | 9<br>(10.3%)  | 0<br>(0.0%)   | 8<br>(9.2%)   | <table border="1"> <tr><td>Gold standard<br/>NonPDAC (87)</td><td>11<br/>(12.6%)</td><td>0<br/>(0.0%)</td><td>0<br/>(0.0%)</td></tr> <tr><td>Normal (116)</td><td>1<br/>(0.9%)</td><td>0<br/>(0.0%)</td><td>115<br/>(100.0%)</td></tr> <tr><td>PDAC (114)</td><td>11<br/>(12.6%)</td><td>0<br/>(0.0%)</td><td>0<br/>(0.0%)</td></tr> </table>       | Gold standard<br>NonPDAC (87) | 11<br>(12.6%) | 0<br>(0.0%)   | 0<br>(0.0%)   | Normal (116) | 1<br>(0.9%) | 0<br>(0.0%) | 115<br>(100.0%) | PDAC (114) | 11<br>(12.6%) | 0<br>(0.0%)   | 0<br>(0.0%)   | <table border="1"> <tr><td>Gold standard<br/>NonPDAC (87)</td><td>8<br/>(9.2%)</td><td>13<br/>(14.9%)</td><td>17<br/>(19.3%)</td></tr> <tr><td>Normal (116)</td><td>0<br/>(0.0%)</td><td>0<br/>(0.0%)</td><td>116<br/>(100.0%)</td></tr> <tr><td>PDAC (114)</td><td>8<br/>(9.2%)</td><td>13<br/>(14.9%)</td><td>17<br/>(19.3%)</td></tr> </table> | Gold standard<br>NonPDAC (87) | 8<br>(9.2%) | 13<br>(14.9%) | 17<br>(19.3%) | Normal (116) | 0<br>(0.0%) | 0<br>(0.0%) | 116<br>(100.0%) | PDAC (114) | 8<br>(9.2%) | 13<br>(14.9%) | 17<br>(19.3%) | <table border="1"> <tr><td>Gold standard<br/>NonPDAC (87)</td><td>8<br/>(9.2%)</td><td>13<br/>(14.9%)</td><td>17<br/>(19.3%)</td></tr> <tr><td>Normal (116)</td><td>0<br/>(0.0%)</td><td>0<br/>(0.0%)</td><td>116<br/>(100.0%)</td></tr> <tr><td>PDAC (114)</td><td>8<br/>(9.2%)</td><td>13<br/>(14.9%)</td><td>17<br/>(19.3%)</td></tr> </table> | Gold standard<br>NonPDAC (87) | 8<br>(9.2%) | 13<br>(14.9%) | 17<br>(19.3%) | Normal (116) | 0<br>(0.0%) | 0<br>(0.0%) | 116<br>(100.0%) | PDAC (114) | 8<br>(9.2%) | 13<br>(14.9%) | 17<br>(19.3%) |
| Gold standard<br>NonPDAC (97)                                                                                                                                                                                                                                                                                                                     | 10<br>(14.8%)                 | 9<br>(13.0%)    | 12<br>(11.1%)   |               |              |             |                 |                 |            |               |               |               |                                                                                                                                                                                                                                                                                                                                                   |                               |               |               |               |              |             |             |                |            |               |               |                |                                                                                                                                                                                                                                                                                                                                                      |                               |               |               |               |              |             |             |                 |            |               |               |               |                                                                                                                                                                                                                                                                                                                                                     |                               |               |               |               |              |             |             |                 |            |               |               |               |                                                                                                                                                                                                                                                                                                                                                   |                               |             |               |               |              |             |             |                 |            |             |               |               |                                                                                                                                                                                                                                                                                                                                                   |                               |             |               |               |              |             |             |                 |            |             |               |               |
| Normal (116)                                                                                                                                                                                                                                                                                                                                      | 0<br>(0.0%)                   | 116<br>(100.0%) | 0               |               |              |             |                 |                 |            |               |               |               |                                                                                                                                                                                                                                                                                                                                                   |                               |               |               |               |              |             |             |                |            |               |               |                |                                                                                                                                                                                                                                                                                                                                                      |                               |               |               |               |              |             |             |                 |            |               |               |               |                                                                                                                                                                                                                                                                                                                                                     |                               |               |               |               |              |             |             |                 |            |               |               |               |                                                                                                                                                                                                                                                                                                                                                   |                               |             |               |               |              |             |             |                 |            |             |               |               |                                                                                                                                                                                                                                                                                                                                                   |                               |             |               |               |              |             |             |                 |            |             |               |               |
| PDAC (95)                                                                                                                                                                                                                                                                                                                                         | 10<br>(10.5%)                 | 9<br>(9.5%)     | 12<br>(12.6%)   |               |              |             |                 |                 |            |               |               |               |                                                                                                                                                                                                                                                                                                                                                   |                               |               |               |               |              |             |             |                |            |               |               |                |                                                                                                                                                                                                                                                                                                                                                      |                               |               |               |               |              |             |             |                 |            |               |               |               |                                                                                                                                                                                                                                                                                                                                                     |                               |               |               |               |              |             |             |                 |            |               |               |               |                                                                                                                                                                                                                                                                                                                                                   |                               |             |               |               |              |             |             |                 |            |             |               |               |                                                                                                                                                                                                                                                                                                                                                   |                               |             |               |               |              |             |             |                 |            |             |               |               |
| Gold standard<br>NonPDAC (97)                                                                                                                                                                                                                                                                                                                     | 9<br>(9.3%)                   | 47<br>(47.5%)   | 91<br>(92.5%)   |               |              |             |                 |                 |            |               |               |               |                                                                                                                                                                                                                                                                                                                                                   |                               |               |               |               |              |             |             |                |            |               |               |                |                                                                                                                                                                                                                                                                                                                                                      |                               |               |               |               |              |             |             |                 |            |               |               |               |                                                                                                                                                                                                                                                                                                                                                     |                               |               |               |               |              |             |             |                 |            |               |               |               |                                                                                                                                                                                                                                                                                                                                                   |                               |             |               |               |              |             |             |                 |            |             |               |               |                                                                                                                                                                                                                                                                                                                                                   |                               |             |               |               |              |             |             |                 |            |             |               |               |
| Normal (116)                                                                                                                                                                                                                                                                                                                                      | 2<br>(1.7%)                   | 0<br>(0.0%)     | 114<br>(98.3%)  |               |              |             |                 |                 |            |               |               |               |                                                                                                                                                                                                                                                                                                                                                   |                               |               |               |               |              |             |             |                |            |               |               |                |                                                                                                                                                                                                                                                                                                                                                      |                               |               |               |               |              |             |             |                 |            |               |               |               |                                                                                                                                                                                                                                                                                                                                                     |                               |               |               |               |              |             |             |                 |            |               |               |               |                                                                                                                                                                                                                                                                                                                                                   |                               |             |               |               |              |             |             |                 |            |             |               |               |                                                                                                                                                                                                                                                                                                                                                   |                               |             |               |               |              |             |             |                 |            |             |               |               |
| PDAC (87)                                                                                                                                                                                                                                                                                                                                         | 9<br>(10.3%)                  | 47<br>(54.0%)   | 91<br>(104.0%)  |               |              |             |                 |                 |            |               |               |               |                                                                                                                                                                                                                                                                                                                                                   |                               |               |               |               |              |             |             |                |            |               |               |                |                                                                                                                                                                                                                                                                                                                                                      |                               |               |               |               |              |             |             |                 |            |               |               |               |                                                                                                                                                                                                                                                                                                                                                     |                               |               |               |               |              |             |             |                 |            |               |               |               |                                                                                                                                                                                                                                                                                                                                                   |                               |             |               |               |              |             |             |                 |            |             |               |               |                                                                                                                                                                                                                                                                                                                                                   |                               |             |               |               |              |             |             |                 |            |             |               |               |
| Gold standard<br>NonPDAC (87)                                                                                                                                                                                                                                                                                                                     | 9<br>(10.3%)                  | 0<br>(0.0%)     | 8<br>(9.2%)     |               |              |             |                 |                 |            |               |               |               |                                                                                                                                                                                                                                                                                                                                                   |                               |               |               |               |              |             |             |                |            |               |               |                |                                                                                                                                                                                                                                                                                                                                                      |                               |               |               |               |              |             |             |                 |            |               |               |               |                                                                                                                                                                                                                                                                                                                                                     |                               |               |               |               |              |             |             |                 |            |               |               |               |                                                                                                                                                                                                                                                                                                                                                   |                               |             |               |               |              |             |             |                 |            |             |               |               |                                                                                                                                                                                                                                                                                                                                                   |                               |             |               |               |              |             |             |                 |            |             |               |               |
| Normal (116)                                                                                                                                                                                                                                                                                                                                      | 0<br>(0.0%)                   | 1<br>(0.9%)     | 115<br>(99.1%)  |               |              |             |                 |                 |            |               |               |               |                                                                                                                                                                                                                                                                                                                                                   |                               |               |               |               |              |             |             |                |            |               |               |                |                                                                                                                                                                                                                                                                                                                                                      |                               |               |               |               |              |             |             |                 |            |               |               |               |                                                                                                                                                                                                                                                                                                                                                     |                               |               |               |               |              |             |             |                 |            |               |               |               |                                                                                                                                                                                                                                                                                                                                                   |                               |             |               |               |              |             |             |                 |            |             |               |               |                                                                                                                                                                                                                                                                                                                                                   |                               |             |               |               |              |             |             |                 |            |             |               |               |
| PDAC (87)                                                                                                                                                                                                                                                                                                                                         | 9<br>(10.3%)                  | 0<br>(0.0%)     | 8<br>(9.2%)     |               |              |             |                 |                 |            |               |               |               |                                                                                                                                                                                                                                                                                                                                                   |                               |               |               |               |              |             |             |                |            |               |               |                |                                                                                                                                                                                                                                                                                                                                                      |                               |               |               |               |              |             |             |                 |            |               |               |               |                                                                                                                                                                                                                                                                                                                                                     |                               |               |               |               |              |             |             |                 |            |               |               |               |                                                                                                                                                                                                                                                                                                                                                   |                               |             |               |               |              |             |             |                 |            |             |               |               |                                                                                                                                                                                                                                                                                                                                                   |                               |             |               |               |              |             |             |                 |            |             |               |               |
| Gold standard<br>NonPDAC (87)                                                                                                                                                                                                                                                                                                                     | 11<br>(12.6%)                 | 0<br>(0.0%)     | 0<br>(0.0%)     |               |              |             |                 |                 |            |               |               |               |                                                                                                                                                                                                                                                                                                                                                   |                               |               |               |               |              |             |             |                |            |               |               |                |                                                                                                                                                                                                                                                                                                                                                      |                               |               |               |               |              |             |             |                 |            |               |               |               |                                                                                                                                                                                                                                                                                                                                                     |                               |               |               |               |              |             |             |                 |            |               |               |               |                                                                                                                                                                                                                                                                                                                                                   |                               |             |               |               |              |             |             |                 |            |             |               |               |                                                                                                                                                                                                                                                                                                                                                   |                               |             |               |               |              |             |             |                 |            |             |               |               |
| Normal (116)                                                                                                                                                                                                                                                                                                                                      | 1<br>(0.9%)                   | 0<br>(0.0%)     | 115<br>(100.0%) |               |              |             |                 |                 |            |               |               |               |                                                                                                                                                                                                                                                                                                                                                   |                               |               |               |               |              |             |             |                |            |               |               |                |                                                                                                                                                                                                                                                                                                                                                      |                               |               |               |               |              |             |             |                 |            |               |               |               |                                                                                                                                                                                                                                                                                                                                                     |                               |               |               |               |              |             |             |                 |            |               |               |               |                                                                                                                                                                                                                                                                                                                                                   |                               |             |               |               |              |             |             |                 |            |             |               |               |                                                                                                                                                                                                                                                                                                                                                   |                               |             |               |               |              |             |             |                 |            |             |               |               |
| PDAC (114)                                                                                                                                                                                                                                                                                                                                        | 11<br>(12.6%)                 | 0<br>(0.0%)     | 0<br>(0.0%)     |               |              |             |                 |                 |            |               |               |               |                                                                                                                                                                                                                                                                                                                                                   |                               |               |               |               |              |             |             |                |            |               |               |                |                                                                                                                                                                                                                                                                                                                                                      |                               |               |               |               |              |             |             |                 |            |               |               |               |                                                                                                                                                                                                                                                                                                                                                     |                               |               |               |               |              |             |             |                 |            |               |               |               |                                                                                                                                                                                                                                                                                                                                                   |                               |             |               |               |              |             |             |                 |            |             |               |               |                                                                                                                                                                                                                                                                                                                                                   |                               |             |               |               |              |             |             |                 |            |             |               |               |
| Gold standard<br>NonPDAC (87)                                                                                                                                                                                                                                                                                                                     | 8<br>(9.2%)                   | 13<br>(14.9%)   | 17<br>(19.3%)   |               |              |             |                 |                 |            |               |               |               |                                                                                                                                                                                                                                                                                                                                                   |                               |               |               |               |              |             |             |                |            |               |               |                |                                                                                                                                                                                                                                                                                                                                                      |                               |               |               |               |              |             |             |                 |            |               |               |               |                                                                                                                                                                                                                                                                                                                                                     |                               |               |               |               |              |             |             |                 |            |               |               |               |                                                                                                                                                                                                                                                                                                                                                   |                               |             |               |               |              |             |             |                 |            |             |               |               |                                                                                                                                                                                                                                                                                                                                                   |                               |             |               |               |              |             |             |                 |            |             |               |               |
| Normal (116)                                                                                                                                                                                                                                                                                                                                      | 0<br>(0.0%)                   | 0<br>(0.0%)     | 116<br>(100.0%) |               |              |             |                 |                 |            |               |               |               |                                                                                                                                                                                                                                                                                                                                                   |                               |               |               |               |              |             |             |                |            |               |               |                |                                                                                                                                                                                                                                                                                                                                                      |                               |               |               |               |              |             |             |                 |            |               |               |               |                                                                                                                                                                                                                                                                                                                                                     |                               |               |               |               |              |             |             |                 |            |               |               |               |                                                                                                                                                                                                                                                                                                                                                   |                               |             |               |               |              |             |             |                 |            |             |               |               |                                                                                                                                                                                                                                                                                                                                                   |                               |             |               |               |              |             |             |                 |            |             |               |               |
| PDAC (114)                                                                                                                                                                                                                                                                                                                                        | 8<br>(9.2%)                   | 13<br>(14.9%)   | 17<br>(19.3%)   |               |              |             |                 |                 |            |               |               |               |                                                                                                                                                                                                                                                                                                                                                   |                               |               |               |               |              |             |             |                |            |               |               |                |                                                                                                                                                                                                                                                                                                                                                      |                               |               |               |               |              |             |             |                 |            |               |               |               |                                                                                                                                                                                                                                                                                                                                                     |                               |               |               |               |              |             |             |                 |            |               |               |               |                                                                                                                                                                                                                                                                                                                                                   |                               |             |               |               |              |             |             |                 |            |             |               |               |                                                                                                                                                                                                                                                                                                                                                   |                               |             |               |               |              |             |             |                 |            |             |               |               |
| Gold standard<br>NonPDAC (87)                                                                                                                                                                                                                                                                                                                     | 8<br>(9.2%)                   | 13<br>(14.9%)   | 17<br>(19.3%)   |               |              |             |                 |                 |            |               |               |               |                                                                                                                                                                                                                                                                                                                                                   |                               |               |               |               |              |             |             |                |            |               |               |                |                                                                                                                                                                                                                                                                                                                                                      |                               |               |               |               |              |             |             |                 |            |               |               |               |                                                                                                                                                                                                                                                                                                                                                     |                               |               |               |               |              |             |             |                 |            |               |               |               |                                                                                                                                                                                                                                                                                                                                                   |                               |             |               |               |              |             |             |                 |            |             |               |               |                                                                                                                                                                                                                                                                                                                                                   |                               |             |               |               |              |             |             |                 |            |             |               |               |
| Normal (116)                                                                                                                                                                                                                                                                                                                                      | 0<br>(0.0%)                   | 0<br>(0.0%)     | 116<br>(100.0%) |               |              |             |                 |                 |            |               |               |               |                                                                                                                                                                                                                                                                                                                                                   |                               |               |               |               |              |             |             |                |            |               |               |                |                                                                                                                                                                                                                                                                                                                                                      |                               |               |               |               |              |             |             |                 |            |               |               |               |                                                                                                                                                                                                                                                                                                                                                     |                               |               |               |               |              |             |             |                 |            |               |               |               |                                                                                                                                                                                                                                                                                                                                                   |                               |             |               |               |              |             |             |                 |            |             |               |               |                                                                                                                                                                                                                                                                                                                                                   |                               |             |               |               |              |             |             |                 |            |             |               |               |
| PDAC (114)                                                                                                                                                                                                                                                                                                                                        | 8<br>(9.2%)                   | 13<br>(14.9%)   | 17<br>(19.3%)   |               |              |             |                 |                 |            |               |               |               |                                                                                                                                                                                                                                                                                                                                                   |                               |               |               |               |              |             |             |                |            |               |               |                |                                                                                                                                                                                                                                                                                                                                                      |                               |               |               |               |              |             |             |                 |            |               |               |               |                                                                                                                                                                                                                                                                                                                                                     |                               |               |               |               |              |             |             |                 |            |               |               |               |                                                                                                                                                                                                                                                                                                                                                   |                               |             |               |               |              |             |             |                 |            |             |               |               |                                                                                                                                                                                                                                                                                                                                                   |                               |             |               |               |              |             |             |                 |            |             |               |               |
| <table border="1"> <tr><td>Gold standard<br/>NonPDAC (97)</td><td>4<br/>(4.0%)</td><td>55<br/>(56.7%)</td><td>8<br/>(8.2%)</td></tr> <tr><td>Normal (116)</td><td>0<br/>(0.0%)</td><td>0<br/>(0.0%)</td><td>116<br/>(100.0%)</td></tr> <tr><td>PDAC (89)</td><td>4<br/>(4.5%)</td><td>55<br/>(61.8%)</td><td>8<br/>(9.0%)</td></tr> </table>      | Gold standard<br>NonPDAC (97) | 4<br>(4.0%)     | 55<br>(56.7%)   | 8<br>(8.2%)   | Normal (116) | 0<br>(0.0%) | 0<br>(0.0%)     | 116<br>(100.0%) | PDAC (89)  | 4<br>(4.5%)   | 55<br>(61.8%) | 8<br>(9.0%)   | <table border="1"> <tr><td>Gold standard<br/>NonPDAC (97)</td><td>9<br/>(9.3%)</td><td>54<br/>(55.6%)</td><td>3<br/>(3.1%)</td></tr> <tr><td>Normal (116)</td><td>1<br/>(0.9%)</td><td>1<br/>(0.9%)</td><td>114<br/>(98.2%)</td></tr> <tr><td>PDAC (107)</td><td>9<br/>(10.3%)</td><td>54<br/>(61.8%)</td><td>3<br/>(3.4%)</td></tr> </table>     | Gold standard<br>NonPDAC (97) | 9<br>(9.3%)   | 54<br>(55.6%) | 3<br>(3.1%)   | Normal (116) | 1<br>(0.9%) | 1<br>(0.9%) | 114<br>(98.2%) | PDAC (107) | 9<br>(10.3%)  | 54<br>(61.8%) | 3<br>(3.4%)    | <table border="1"> <tr><td>Gold standard<br/>NonPDAC (87)</td><td>4<br/>(4.6%)</td><td>81<br/>(83.9%)</td><td>12<br/>(12.5%)</td></tr> <tr><td>Normal (116)</td><td>0<br/>(0.0%)</td><td>0<br/>(0.0%)</td><td>116<br/>(100.0%)</td></tr> <tr><td>PDAC (89)</td><td>4<br/>(4.5%)</td><td>81<br/>(91.4%)</td><td>12<br/>(13.6%)</td></tr> </table>     | Gold standard<br>NonPDAC (87) | 4<br>(4.6%)   | 81<br>(83.9%) | 12<br>(12.5%) | Normal (116) | 0<br>(0.0%) | 0<br>(0.0%) | 116<br>(100.0%) | PDAC (89)  | 4<br>(4.5%)   | 81<br>(91.4%) | 12<br>(13.6%) | <table border="1"> <tr><td>Gold standard<br/>NonPDAC (87)</td><td>4<br/>(4.6%)</td><td>57<br/>(58.5%)</td><td>1<br/>(1.0%)</td></tr> <tr><td>Normal (116)</td><td>0<br/>(0.0%)</td><td>0<br/>(0.0%)</td><td>116<br/>(100.0%)</td></tr> <tr><td>PDAC (89)</td><td>4<br/>(4.5%)</td><td>57<br/>(64.7%)</td><td>1<br/>(1.1%)</td></tr> </table>        | Gold standard<br>NonPDAC (87) | 4<br>(4.6%)   | 57<br>(58.5%) | 1<br>(1.0%)   | Normal (116) | 0<br>(0.0%) | 0<br>(0.0%) | 116<br>(100.0%) | PDAC (89)  | 4<br>(4.5%)   | 57<br>(64.7%) | 1<br>(1.1%)   | <table border="1"> <tr><td>Gold standard<br/>NonPDAC (87)</td><td>8<br/>(8.2%)</td><td>15<br/>(15.5%)</td><td>9<br/>(9.2%)</td></tr> <tr><td>Normal (116)</td><td>0<br/>(0.0%)</td><td>0<br/>(0.0%)</td><td>116<br/>(100.0%)</td></tr> <tr><td>PDAC (114)</td><td>8<br/>(8.9%)</td><td>15<br/>(16.4%)</td><td>9<br/>(9.9%)</td></tr> </table>     | Gold standard<br>NonPDAC (87) | 8<br>(8.2%) | 15<br>(15.5%) | 9<br>(9.2%)   | Normal (116) | 0<br>(0.0%) | 0<br>(0.0%) | 116<br>(100.0%) | PDAC (114) | 8<br>(8.9%) | 15<br>(16.4%) | 9<br>(9.9%)   | <table border="1"> <tr><td>Gold standard<br/>NonPDAC (87)</td><td>8<br/>(8.2%)</td><td>15<br/>(15.5%)</td><td>9<br/>(9.2%)</td></tr> <tr><td>Normal (116)</td><td>0<br/>(0.0%)</td><td>0<br/>(0.0%)</td><td>116<br/>(100.0%)</td></tr> <tr><td>PDAC (114)</td><td>8<br/>(8.9%)</td><td>15<br/>(16.4%)</td><td>9<br/>(9.9%)</td></tr> </table>     | Gold standard<br>NonPDAC (87) | 8<br>(8.2%) | 15<br>(15.5%) | 9<br>(9.2%)   | Normal (116) | 0<br>(0.0%) | 0<br>(0.0%) | 116<br>(100.0%) | PDAC (114) | 8<br>(8.9%) | 15<br>(16.4%) | 9<br>(9.9%)   |
| Gold standard<br>NonPDAC (97)                                                                                                                                                                                                                                                                                                                     | 4<br>(4.0%)                   | 55<br>(56.7%)   | 8<br>(8.2%)     |               |              |             |                 |                 |            |               |               |               |                                                                                                                                                                                                                                                                                                                                                   |                               |               |               |               |              |             |             |                |            |               |               |                |                                                                                                                                                                                                                                                                                                                                                      |                               |               |               |               |              |             |             |                 |            |               |               |               |                                                                                                                                                                                                                                                                                                                                                     |                               |               |               |               |              |             |             |                 |            |               |               |               |                                                                                                                                                                                                                                                                                                                                                   |                               |             |               |               |              |             |             |                 |            |             |               |               |                                                                                                                                                                                                                                                                                                                                                   |                               |             |               |               |              |             |             |                 |            |             |               |               |
| Normal (116)                                                                                                                                                                                                                                                                                                                                      | 0<br>(0.0%)                   | 0<br>(0.0%)     | 116<br>(100.0%) |               |              |             |                 |                 |            |               |               |               |                                                                                                                                                                                                                                                                                                                                                   |                               |               |               |               |              |             |             |                |            |               |               |                |                                                                                                                                                                                                                                                                                                                                                      |                               |               |               |               |              |             |             |                 |            |               |               |               |                                                                                                                                                                                                                                                                                                                                                     |                               |               |               |               |              |             |             |                 |            |               |               |               |                                                                                                                                                                                                                                                                                                                                                   |                               |             |               |               |              |             |             |                 |            |             |               |               |                                                                                                                                                                                                                                                                                                                                                   |                               |             |               |               |              |             |             |                 |            |             |               |               |
| PDAC (89)                                                                                                                                                                                                                                                                                                                                         | 4<br>(4.5%)                   | 55<br>(61.8%)   | 8<br>(9.0%)     |               |              |             |                 |                 |            |               |               |               |                                                                                                                                                                                                                                                                                                                                                   |                               |               |               |               |              |             |             |                |            |               |               |                |                                                                                                                                                                                                                                                                                                                                                      |                               |               |               |               |              |             |             |                 |            |               |               |               |                                                                                                                                                                                                                                                                                                                                                     |                               |               |               |               |              |             |             |                 |            |               |               |               |                                                                                                                                                                                                                                                                                                                                                   |                               |             |               |               |              |             |             |                 |            |             |               |               |                                                                                                                                                                                                                                                                                                                                                   |                               |             |               |               |              |             |             |                 |            |             |               |               |
| Gold standard<br>NonPDAC (97)                                                                                                                                                                                                                                                                                                                     | 9<br>(9.3%)                   | 54<br>(55.6%)   | 3<br>(3.1%)     |               |              |             |                 |                 |            |               |               |               |                                                                                                                                                                                                                                                                                                                                                   |                               |               |               |               |              |             |             |                |            |               |               |                |                                                                                                                                                                                                                                                                                                                                                      |                               |               |               |               |              |             |             |                 |            |               |               |               |                                                                                                                                                                                                                                                                                                                                                     |                               |               |               |               |              |             |             |                 |            |               |               |               |                                                                                                                                                                                                                                                                                                                                                   |                               |             |               |               |              |             |             |                 |            |             |               |               |                                                                                                                                                                                                                                                                                                                                                   |                               |             |               |               |              |             |             |                 |            |             |               |               |
| Normal (116)                                                                                                                                                                                                                                                                                                                                      | 1<br>(0.9%)                   | 1<br>(0.9%)     | 114<br>(98.2%)  |               |              |             |                 |                 |            |               |               |               |                                                                                                                                                                                                                                                                                                                                                   |                               |               |               |               |              |             |             |                |            |               |               |                |                                                                                                                                                                                                                                                                                                                                                      |                               |               |               |               |              |             |             |                 |            |               |               |               |                                                                                                                                                                                                                                                                                                                                                     |                               |               |               |               |              |             |             |                 |            |               |               |               |                                                                                                                                                                                                                                                                                                                                                   |                               |             |               |               |              |             |             |                 |            |             |               |               |                                                                                                                                                                                                                                                                                                                                                   |                               |             |               |               |              |             |             |                 |            |             |               |               |
| PDAC (107)                                                                                                                                                                                                                                                                                                                                        | 9<br>(10.3%)                  | 54<br>(61.8%)   | 3<br>(3.4%)     |               |              |             |                 |                 |            |               |               |               |                                                                                                                                                                                                                                                                                                                                                   |                               |               |               |               |              |             |             |                |            |               |               |                |                                                                                                                                                                                                                                                                                                                                                      |                               |               |               |               |              |             |             |                 |            |               |               |               |                                                                                                                                                                                                                                                                                                                                                     |                               |               |               |               |              |             |             |                 |            |               |               |               |                                                                                                                                                                                                                                                                                                                                                   |                               |             |               |               |              |             |             |                 |            |             |               |               |                                                                                                                                                                                                                                                                                                                                                   |                               |             |               |               |              |             |             |                 |            |             |               |               |
| Gold standard<br>NonPDAC (87)                                                                                                                                                                                                                                                                                                                     | 4<br>(4.6%)                   | 81<br>(83.9%)   | 12<br>(12.5%)   |               |              |             |                 |                 |            |               |               |               |                                                                                                                                                                                                                                                                                                                                                   |                               |               |               |               |              |             |             |                |            |               |               |                |                                                                                                                                                                                                                                                                                                                                                      |                               |               |               |               |              |             |             |                 |            |               |               |               |                                                                                                                                                                                                                                                                                                                                                     |                               |               |               |               |              |             |             |                 |            |               |               |               |                                                                                                                                                                                                                                                                                                                                                   |                               |             |               |               |              |             |             |                 |            |             |               |               |                                                                                                                                                                                                                                                                                                                                                   |                               |             |               |               |              |             |             |                 |            |             |               |               |
| Normal (116)                                                                                                                                                                                                                                                                                                                                      | 0<br>(0.0%)                   | 0<br>(0.0%)     | 116<br>(100.0%) |               |              |             |                 |                 |            |               |               |               |                                                                                                                                                                                                                                                                                                                                                   |                               |               |               |               |              |             |             |                |            |               |               |                |                                                                                                                                                                                                                                                                                                                                                      |                               |               |               |               |              |             |             |                 |            |               |               |               |                                                                                                                                                                                                                                                                                                                                                     |                               |               |               |               |              |             |             |                 |            |               |               |               |                                                                                                                                                                                                                                                                                                                                                   |                               |             |               |               |              |             |             |                 |            |             |               |               |                                                                                                                                                                                                                                                                                                                                                   |                               |             |               |               |              |             |             |                 |            |             |               |               |
| PDAC (89)                                                                                                                                                                                                                                                                                                                                         | 4<br>(4.5%)                   | 81<br>(91.4%)   | 12<br>(13.6%)   |               |              |             |                 |                 |            |               |               |               |                                                                                                                                                                                                                                                                                                                                                   |                               |               |               |               |              |             |             |                |            |               |               |                |                                                                                                                                                                                                                                                                                                                                                      |                               |               |               |               |              |             |             |                 |            |               |               |               |                                                                                                                                                                                                                                                                                                                                                     |                               |               |               |               |              |             |             |                 |            |               |               |               |                                                                                                                                                                                                                                                                                                                                                   |                               |             |               |               |              |             |             |                 |            |             |               |               |                                                                                                                                                                                                                                                                                                                                                   |                               |             |               |               |              |             |             |                 |            |             |               |               |
| Gold standard<br>NonPDAC (87)                                                                                                                                                                                                                                                                                                                     | 4<br>(4.6%)                   | 57<br>(58.5%)   | 1<br>(1.0%)     |               |              |             |                 |                 |            |               |               |               |                                                                                                                                                                                                                                                                                                                                                   |                               |               |               |               |              |             |             |                |            |               |               |                |                                                                                                                                                                                                                                                                                                                                                      |                               |               |               |               |              |             |             |                 |            |               |               |               |                                                                                                                                                                                                                                                                                                                                                     |                               |               |               |               |              |             |             |                 |            |               |               |               |                                                                                                                                                                                                                                                                                                                                                   |                               |             |               |               |              |             |             |                 |            |             |               |               |                                                                                                                                                                                                                                                                                                                                                   |                               |             |               |               |              |             |             |                 |            |             |               |               |
| Normal (116)                                                                                                                                                                                                                                                                                                                                      | 0<br>(0.0%)                   | 0<br>(0.0%)     | 116<br>(100.0%) |               |              |             |                 |                 |            |               |               |               |                                                                                                                                                                                                                                                                                                                                                   |                               |               |               |               |              |             |             |                |            |               |               |                |                                                                                                                                                                                                                                                                                                                                                      |                               |               |               |               |              |             |             |                 |            |               |               |               |                                                                                                                                                                                                                                                                                                                                                     |                               |               |               |               |              |             |             |                 |            |               |               |               |                                                                                                                                                                                                                                                                                                                                                   |                               |             |               |               |              |             |             |                 |            |             |               |               |                                                                                                                                                                                                                                                                                                                                                   |                               |             |               |               |              |             |             |                 |            |             |               |               |
| PDAC (89)                                                                                                                                                                                                                                                                                                                                         | 4<br>(4.5%)                   | 57<br>(64.7%)   | 1<br>(1.1%)     |               |              |             |                 |                 |            |               |               |               |                                                                                                                                                                                                                                                                                                                                                   |                               |               |               |               |              |             |             |                |            |               |               |                |                                                                                                                                                                                                                                                                                                                                                      |                               |               |               |               |              |             |             |                 |            |               |               |               |                                                                                                                                                                                                                                                                                                                                                     |                               |               |               |               |              |             |             |                 |            |               |               |               |                                                                                                                                                                                                                                                                                                                                                   |                               |             |               |               |              |             |             |                 |            |             |               |               |                                                                                                                                                                                                                                                                                                                                                   |                               |             |               |               |              |             |             |                 |            |             |               |               |
| Gold standard<br>NonPDAC (87)                                                                                                                                                                                                                                                                                                                     | 8<br>(8.2%)                   | 15<br>(15.5%)   | 9<br>(9.2%)     |               |              |             |                 |                 |            |               |               |               |                                                                                                                                                                                                                                                                                                                                                   |                               |               |               |               |              |             |             |                |            |               |               |                |                                                                                                                                                                                                                                                                                                                                                      |                               |               |               |               |              |             |             |                 |            |               |               |               |                                                                                                                                                                                                                                                                                                                                                     |                               |               |               |               |              |             |             |                 |            |               |               |               |                                                                                                                                                                                                                                                                                                                                                   |                               |             |               |               |              |             |             |                 |            |             |               |               |                                                                                                                                                                                                                                                                                                                                                   |                               |             |               |               |              |             |             |                 |            |             |               |               |
| Normal (116)                                                                                                                                                                                                                                                                                                                                      | 0<br>(0.0%)                   | 0<br>(0.0%)     | 116<br>(100.0%) |               |              |             |                 |                 |            |               |               |               |                                                                                                                                                                                                                                                                                                                                                   |                               |               |               |               |              |             |             |                |            |               |               |                |                                                                                                                                                                                                                                                                                                                                                      |                               |               |               |               |              |             |             |                 |            |               |               |               |                                                                                                                                                                                                                                                                                                                                                     |                               |               |               |               |              |             |             |                 |            |               |               |               |                                                                                                                                                                                                                                                                                                                                                   |                               |             |               |               |              |             |             |                 |            |             |               |               |                                                                                                                                                                                                                                                                                                                                                   |                               |             |               |               |              |             |             |                 |            |             |               |               |
| PDAC (114)                                                                                                                                                                                                                                                                                                                                        | 8<br>(8.9%)                   | 15<br>(16.4%)   | 9<br>(9.9%)     |               |              |             |                 |                 |            |               |               |               |                                                                                                                                                                                                                                                                                                                                                   |                               |               |               |               |              |             |             |                |            |               |               |                |                                                                                                                                                                                                                                                                                                                                                      |                               |               |               |               |              |             |             |                 |            |               |               |               |                                                                                                                                                                                                                                                                                                                                                     |                               |               |               |               |              |             |             |                 |            |               |               |               |                                                                                                                                                                                                                                                                                                                                                   |                               |             |               |               |              |             |             |                 |            |             |               |               |                                                                                                                                                                                                                                                                                                                                                   |                               |             |               |               |              |             |             |                 |            |             |               |               |
| Gold standard<br>NonPDAC (87)                                                                                                                                                                                                                                                                                                                     | 8<br>(8.2%)                   | 15<br>(15.5%)   | 9<br>(9.2%)     |               |              |             |                 |                 |            |               |               |               |                                                                                                                                                                                                                                                                                                                                                   |                               |               |               |               |              |             |             |                |            |               |               |                |                                                                                                                                                                                                                                                                                                                                                      |                               |               |               |               |              |             |             |                 |            |               |               |               |                                                                                                                                                                                                                                                                                                                                                     |                               |               |               |               |              |             |             |                 |            |               |               |               |                                                                                                                                                                                                                                                                                                                                                   |                               |             |               |               |              |             |             |                 |            |             |               |               |                                                                                                                                                                                                                                                                                                                                                   |                               |             |               |               |              |             |             |                 |            |             |               |               |
| Normal (116)                                                                                                                                                                                                                                                                                                                                      | 0<br>(0.0%)                   | 0<br>(0.0%)     | 116<br>(100.0%) |               |              |             |                 |                 |            |               |               |               |                                                                                                                                                                                                                                                                                                                                                   |                               |               |               |               |              |             |             |                |            |               |               |                |                                                                                                                                                                                                                                                                                                                                                      |                               |               |               |               |              |             |             |                 |            |               |               |               |                                                                                                                                                                                                                                                                                                                                                     |                               |               |               |               |              |             |             |                 |            |               |               |               |                                                                                                                                                                                                                                                                                                                                                   |                               |             |               |               |              |             |             |                 |            |             |               |               |                                                                                                                                                                                                                                                                                                                                                   |                               |             |               |               |              |             |             |                 |            |             |               |               |
| PDAC (114)                                                                                                                                                                                                                                                                                                                                        | 8<br>(8.9%)                   | 15<br>(16.4%)   | 9<br>(9.9%)     |               |              |             |                 |                 |            |               |               |               |                                                                                                                                                                                                                                                                                                                                                   |                               |               |               |               |              |             |             |                |            |               |               |                |                                                                                                                                                                                                                                                                                                                                                      |                               |               |               |               |              |             |             |                 |            |               |               |               |                                                                                                                                                                                                                                                                                                                                                     |                               |               |               |               |              |             |             |                 |            |               |               |               |                                                                                                                                                                                                                                                                                                                                                   |                               |             |               |               |              |             |             |                 |            |             |               |               |                                                                                                                                                                                                                                                                                                                                                   |                               |             |               |               |              |             |             |                 |            |             |               |               |
| <table border="1"> <tr><td>Gold standard<br/>NonPDAC (97)</td><td>7<br/>(7.2%)</td><td>5<br/>(5.2%)</td><td>14<br/>(13.0%)</td></tr> <tr><td>Normal (116)</td><td>1<br/>(0.9%)</td><td>8<br/>(6.9%)</td><td>105<br/>(90.4%)</td></tr> <tr><td>PDAC (89)</td><td>7<br/>(7.8%)</td><td>5<br/>(5.6%)</td><td>14<br/>(15.6%)</td></tr> </table>       | Gold standard<br>NonPDAC (97) | 7<br>(7.2%)     | 5<br>(5.2%)     | 14<br>(13.0%) | Normal (116) | 1<br>(0.9%) | 8<br>(6.9%)     | 105<br>(90.4%)  | PDAC (89)  | 7<br>(7.8%)   | 5<br>(5.6%)   | 14<br>(15.6%) | <table border="1"> <tr><td>Gold standard<br/>NonPDAC (97)</td><td>7<br/>(7.2%)</td><td>11<br/>(11.3%)</td><td>13<br/>(13.4%)</td></tr> <tr><td>Normal (116)</td><td>1<br/>(0.9%)</td><td>1<br/>(0.9%)</td><td>114<br/>(98.3%)</td></tr> <tr><td>PDAC (107)</td><td>7<br/>(7.8%)</td><td>11<br/>(12.5%)</td><td>13<br/>(14.9%)</td></tr> </table>  | Gold standard<br>NonPDAC (97) | 7<br>(7.2%)   | 11<br>(11.3%) | 13<br>(13.4%) | Normal (116) | 1<br>(0.9%) | 1<br>(0.9%) | 114<br>(98.3%) | PDAC (107) | 7<br>(7.8%)   | 11<br>(12.5%) | 13<br>(14.9%)  | <table border="1"> <tr><td>Gold standard<br/>NonPDAC (87)</td><td>7<br/>(8.0%)</td><td>23<br/>(26.3%)</td><td>13<br/>(14.9%)</td></tr> <tr><td>Normal (116)</td><td>1<br/>(0.9%)</td><td>2<br/>(1.7%)</td><td>113<br/>(97.4%)</td></tr> <tr><td>PDAC (104)</td><td>7<br/>(8.0%)</td><td>23<br/>(26.3%)</td><td>13<br/>(14.9%)</td></tr> </table>     | Gold standard<br>NonPDAC (87) | 7<br>(8.0%)   | 23<br>(26.3%) | 13<br>(14.9%) | Normal (116) | 1<br>(0.9%) | 2<br>(1.7%) | 113<br>(97.4%)  | PDAC (104) | 7<br>(8.0%)   | 23<br>(26.3%) | 13<br>(14.9%) | <table border="1"> <tr><td>Gold standard<br/>NonPDAC (87)</td><td>8<br/>(9.2%)</td><td>9<br/>(10.3%)</td><td>10<br/>(11.5%)</td></tr> <tr><td>Normal (116)</td><td>0<br/>(0.0%)</td><td>0<br/>(0.0%)</td><td>116<br/>(100.0%)</td></tr> <tr><td>PDAC (89)</td><td>8<br/>(9.0%)</td><td>9<br/>(10.3%)</td><td>10<br/>(11.5%)</td></tr> </table>      | Gold standard<br>NonPDAC (87) | 8<br>(9.2%)   | 9<br>(10.3%)  | 10<br>(11.5%) | Normal (116) | 0<br>(0.0%) | 0<br>(0.0%) | 116<br>(100.0%) | PDAC (89)  | 8<br>(9.0%)   | 9<br>(10.3%)  | 10<br>(11.5%) | <table border="1"> <tr><td>Gold standard<br/>NonPDAC (87)</td><td>8<br/>(9.2%)</td><td>9<br/>(10.3%)</td><td>10<br/>(11.5%)</td></tr> <tr><td>Normal (116)</td><td>0<br/>(0.0%)</td><td>0<br/>(0.0%)</td><td>116<br/>(100.0%)</td></tr> <tr><td>PDAC (89)</td><td>8<br/>(9.0%)</td><td>9<br/>(10.3%)</td><td>10<br/>(11.5%)</td></tr> </table>    | Gold standard<br>NonPDAC (87) | 8<br>(9.2%) | 9<br>(10.3%)  | 10<br>(11.5%) | Normal (116) | 0<br>(0.0%) | 0<br>(0.0%) | 116<br>(100.0%) | PDAC (89)  | 8<br>(9.0%) | 9<br>(10.3%)  | 10<br>(11.5%) | <table border="1"> <tr><td>Gold standard<br/>NonPDAC (87)</td><td>8<br/>(9.2%)</td><td>9<br/>(10.3%)</td><td>10<br/>(11.5%)</td></tr> <tr><td>Normal (116)</td><td>0<br/>(0.0%)</td><td>0<br/>(0.0%)</td><td>116<br/>(100.0%)</td></tr> <tr><td>PDAC (89)</td><td>8<br/>(9.0%)</td><td>9<br/>(10.3%)</td><td>10<br/>(11.5%)</td></tr> </table>    | Gold standard<br>NonPDAC (87) | 8<br>(9.2%) | 9<br>(10.3%)  | 10<br>(11.5%) | Normal (116) | 0<br>(0.0%) | 0<br>(0.0%) | 116<br>(100.0%) | PDAC (89)  | 8<br>(9.0%) | 9<br>(10.3%)  | 10<br>(11.5%) |
| Gold standard<br>NonPDAC (97)                                                                                                                                                                                                                                                                                                                     | 7<br>(7.2%)                   | 5<br>(5.2%)     | 14<br>(13.0%)   |               |              |             |                 |                 |            |               |               |               |                                                                                                                                                                                                                                                                                                                                                   |                               |               |               |               |              |             |             |                |            |               |               |                |                                                                                                                                                                                                                                                                                                                                                      |                               |               |               |               |              |             |             |                 |            |               |               |               |                                                                                                                                                                                                                                                                                                                                                     |                               |               |               |               |              |             |             |                 |            |               |               |               |                                                                                                                                                                                                                                                                                                                                                   |                               |             |               |               |              |             |             |                 |            |             |               |               |                                                                                                                                                                                                                                                                                                                                                   |                               |             |               |               |              |             |             |                 |            |             |               |               |
| Normal (116)                                                                                                                                                                                                                                                                                                                                      | 1<br>(0.9%)                   | 8<br>(6.9%)     | 105<br>(90.4%)  |               |              |             |                 |                 |            |               |               |               |                                                                                                                                                                                                                                                                                                                                                   |                               |               |               |               |              |             |             |                |            |               |               |                |                                                                                                                                                                                                                                                                                                                                                      |                               |               |               |               |              |             |             |                 |            |               |               |               |                                                                                                                                                                                                                                                                                                                                                     |                               |               |               |               |              |             |             |                 |            |               |               |               |                                                                                                                                                                                                                                                                                                                                                   |                               |             |               |               |              |             |             |                 |            |             |               |               |                                                                                                                                                                                                                                                                                                                                                   |                               |             |               |               |              |             |             |                 |            |             |               |               |
| PDAC (89)                                                                                                                                                                                                                                                                                                                                         | 7<br>(7.8%)                   | 5<br>(5.6%)     | 14<br>(15.6%)   |               |              |             |                 |                 |            |               |               |               |                                                                                                                                                                                                                                                                                                                                                   |                               |               |               |               |              |             |             |                |            |               |               |                |                                                                                                                                                                                                                                                                                                                                                      |                               |               |               |               |              |             |             |                 |            |               |               |               |                                                                                                                                                                                                                                                                                                                                                     |                               |               |               |               |              |             |             |                 |            |               |               |               |                                                                                                                                                                                                                                                                                                                                                   |                               |             |               |               |              |             |             |                 |            |             |               |               |                                                                                                                                                                                                                                                                                                                                                   |                               |             |               |               |              |             |             |                 |            |             |               |               |
| Gold standard<br>NonPDAC (97)                                                                                                                                                                                                                                                                                                                     | 7<br>(7.2%)                   | 11<br>(11.3%)   | 13<br>(13.4%)   |               |              |             |                 |                 |            |               |               |               |                                                                                                                                                                                                                                                                                                                                                   |                               |               |               |               |              |             |             |                |            |               |               |                |                                                                                                                                                                                                                                                                                                                                                      |                               |               |               |               |              |             |             |                 |            |               |               |               |                                                                                                                                                                                                                                                                                                                                                     |                               |               |               |               |              |             |             |                 |            |               |               |               |                                                                                                                                                                                                                                                                                                                                                   |                               |             |               |               |              |             |             |                 |            |             |               |               |                                                                                                                                                                                                                                                                                                                                                   |                               |             |               |               |              |             |             |                 |            |             |               |               |
| Normal (116)                                                                                                                                                                                                                                                                                                                                      | 1<br>(0.9%)                   | 1<br>(0.9%)     | 114<br>(98.3%)  |               |              |             |                 |                 |            |               |               |               |                                                                                                                                                                                                                                                                                                                                                   |                               |               |               |               |              |             |             |                |            |               |               |                |                                                                                                                                                                                                                                                                                                                                                      |                               |               |               |               |              |             |             |                 |            |               |               |               |                                                                                                                                                                                                                                                                                                                                                     |                               |               |               |               |              |             |             |                 |            |               |               |               |                                                                                                                                                                                                                                                                                                                                                   |                               |             |               |               |              |             |             |                 |            |             |               |               |                                                                                                                                                                                                                                                                                                                                                   |                               |             |               |               |              |             |             |                 |            |             |               |               |
| PDAC (107)                                                                                                                                                                                                                                                                                                                                        | 7<br>(7.8%)                   | 11<br>(12.5%)   | 13<br>(14.9%)   |               |              |             |                 |                 |            |               |               |               |                                                                                                                                                                                                                                                                                                                                                   |                               |               |               |               |              |             |             |                |            |               |               |                |                                                                                                                                                                                                                                                                                                                                                      |                               |               |               |               |              |             |             |                 |            |               |               |               |                                                                                                                                                                                                                                                                                                                                                     |                               |               |               |               |              |             |             |                 |            |               |               |               |                                                                                                                                                                                                                                                                                                                                                   |                               |             |               |               |              |             |             |                 |            |             |               |               |                                                                                                                                                                                                                                                                                                                                                   |                               |             |               |               |              |             |             |                 |            |             |               |               |
| Gold standard<br>NonPDAC (87)                                                                                                                                                                                                                                                                                                                     | 7<br>(8.0%)                   | 23<br>(26.3%)   | 13<br>(14.9%)   |               |              |             |                 |                 |            |               |               |               |                                                                                                                                                                                                                                                                                                                                                   |                               |               |               |               |              |             |             |                |            |               |               |                |                                                                                                                                                                                                                                                                                                                                                      |                               |               |               |               |              |             |             |                 |            |               |               |               |                                                                                                                                                                                                                                                                                                                                                     |                               |               |               |               |              |             |             |                 |            |               |               |               |                                                                                                                                                                                                                                                                                                                                                   |                               |             |               |               |              |             |             |                 |            |             |               |               |                                                                                                                                                                                                                                                                                                                                                   |                               |             |               |               |              |             |             |                 |            |             |               |               |
| Normal (116)                                                                                                                                                                                                                                                                                                                                      | 1<br>(0.9%)                   | 2<br>(1.7%)     | 113<br>(97.4%)  |               |              |             |                 |                 |            |               |               |               |                                                                                                                                                                                                                                                                                                                                                   |                               |               |               |               |              |             |             |                |            |               |               |                |                                                                                                                                                                                                                                                                                                                                                      |                               |               |               |               |              |             |             |                 |            |               |               |               |                                                                                                                                                                                                                                                                                                                                                     |                               |               |               |               |              |             |             |                 |            |               |               |               |                                                                                                                                                                                                                                                                                                                                                   |                               |             |               |               |              |             |             |                 |            |             |               |               |                                                                                                                                                                                                                                                                                                                                                   |                               |             |               |               |              |             |             |                 |            |             |               |               |
| PDAC (104)                                                                                                                                                                                                                                                                                                                                        | 7<br>(8.0%)                   | 23<br>(26.3%)   | 13<br>(14.9%)   |               |              |             |                 |                 |            |               |               |               |                                                                                                                                                                                                                                                                                                                                                   |                               |               |               |               |              |             |             |                |            |               |               |                |                                                                                                                                                                                                                                                                                                                                                      |                               |               |               |               |              |             |             |                 |            |               |               |               |                                                                                                                                                                                                                                                                                                                                                     |                               |               |               |               |              |             |             |                 |            |               |               |               |                                                                                                                                                                                                                                                                                                                                                   |                               |             |               |               |              |             |             |                 |            |             |               |               |                                                                                                                                                                                                                                                                                                                                                   |                               |             |               |               |              |             |             |                 |            |             |               |               |
| Gold standard<br>NonPDAC (87)                                                                                                                                                                                                                                                                                                                     | 8<br>(9.2%)                   | 9<br>(10.3%)    | 10<br>(11.5%)   |               |              |             |                 |                 |            |               |               |               |                                                                                                                                                                                                                                                                                                                                                   |                               |               |               |               |              |             |             |                |            |               |               |                |                                                                                                                                                                                                                                                                                                                                                      |                               |               |               |               |              |             |             |                 |            |               |               |               |                                                                                                                                                                                                                                                                                                                                                     |                               |               |               |               |              |             |             |                 |            |               |               |               |                                                                                                                                                                                                                                                                                                                                                   |                               |             |               |               |              |             |             |                 |            |             |               |               |                                                                                                                                                                                                                                                                                                                                                   |                               |             |               |               |              |             |             |                 |            |             |               |               |
| Normal (116)                                                                                                                                                                                                                                                                                                                                      | 0<br>(0.0%)                   | 0<br>(0.0%)     | 116<br>(100.0%) |               |              |             |                 |                 |            |               |               |               |                                                                                                                                                                                                                                                                                                                                                   |                               |               |               |               |              |             |             |                |            |               |               |                |                                                                                                                                                                                                                                                                                                                                                      |                               |               |               |               |              |             |             |                 |            |               |               |               |                                                                                                                                                                                                                                                                                                                                                     |                               |               |               |               |              |             |             |                 |            |               |               |               |                                                                                                                                                                                                                                                                                                                                                   |                               |             |               |               |              |             |             |                 |            |             |               |               |                                                                                                                                                                                                                                                                                                                                                   |                               |             |               |               |              |             |             |                 |            |             |               |               |
| PDAC (89)                                                                                                                                                                                                                                                                                                                                         | 8<br>(9.0%)                   | 9<br>(10.3%)    | 10<br>(11.5%)   |               |              |             |                 |                 |            |               |               |               |                                                                                                                                                                                                                                                                                                                                                   |                               |               |               |               |              |             |             |                |            |               |               |                |                                                                                                                                                                                                                                                                                                                                                      |                               |               |               |               |              |             |             |                 |            |               |               |               |                                                                                                                                                                                                                                                                                                                                                     |                               |               |               |               |              |             |             |                 |            |               |               |               |                                                                                                                                                                                                                                                                                                                                                   |                               |             |               |               |              |             |             |                 |            |             |               |               |                                                                                                                                                                                                                                                                                                                                                   |                               |             |               |               |              |             |             |                 |            |             |               |               |
| Gold standard<br>NonPDAC (87)                                                                                                                                                                                                                                                                                                                     | 8<br>(9.2%)                   | 9<br>(10.3%)    | 10<br>(11.5%)   |               |              |             |                 |                 |            |               |               |               |                                                                                                                                                                                                                                                                                                                                                   |                               |               |               |               |              |             |             |                |            |               |               |                |                                                                                                                                                                                                                                                                                                                                                      |                               |               |               |               |              |             |             |                 |            |               |               |               |                                                                                                                                                                                                                                                                                                                                                     |                               |               |               |               |              |             |             |                 |            |               |               |               |                                                                                                                                                                                                                                                                                                                                                   |                               |             |               |               |              |             |             |                 |            |             |               |               |                                                                                                                                                                                                                                                                                                                                                   |                               |             |               |               |              |             |             |                 |            |             |               |               |
| Normal (116)                                                                                                                                                                                                                                                                                                                                      | 0<br>(0.0%)                   | 0<br>(0.0%)     | 116<br>(100.0%) |               |              |             |                 |                 |            |               |               |               |                                                                                                                                                                                                                                                                                                                                                   |                               |               |               |               |              |             |             |                |            |               |               |                |                                                                                                                                                                                                                                                                                                                                                      |                               |               |               |               |              |             |             |                 |            |               |               |               |                                                                                                                                                                                                                                                                                                                                                     |                               |               |               |               |              |             |             |                 |            |               |               |               |                                                                                                                                                                                                                                                                                                                                                   |                               |             |               |               |              |             |             |                 |            |             |               |               |                                                                                                                                                                                                                                                                                                                                                   |                               |             |               |               |              |             |             |                 |            |             |               |               |
| PDAC (89)                                                                                                                                                                                                                                                                                                                                         | 8<br>(9.0%)                   | 9<br>(10.3%)    | 10<br>(11.5%)   |               |              |             |                 |                 |            |               |               |               |                                                                                                                                                                                                                                                                                                                                                   |                               |               |               |               |              |             |             |                |            |               |               |                |                                                                                                                                                                                                                                                                                                                                                      |                               |               |               |               |              |             |             |                 |            |               |               |               |                                                                                                                                                                                                                                                                                                                                                     |                               |               |               |               |              |             |             |                 |            |               |               |               |                                                                                                                                                                                                                                                                                                                                                   |                               |             |               |               |              |             |             |                 |            |             |               |               |                                                                                                                                                                                                                                                                                                                                                   |                               |             |               |               |              |             |             |                 |            |             |               |               |
| Gold standard<br>NonPDAC (87)                                                                                                                                                                                                                                                                                                                     | 8<br>(9.2%)                   | 9<br>(10.3%)    | 10<br>(11.5%)   |               |              |             |                 |                 |            |               |               |               |                                                                                                                                                                                                                                                                                                                                                   |                               |               |               |               |              |             |             |                |            |               |               |                |                                                                                                                                                                                                                                                                                                                                                      |                               |               |               |               |              |             |             |                 |            |               |               |               |                                                                                                                                                                                                                                                                                                                                                     |                               |               |               |               |              |             |             |                 |            |               |               |               |                                                                                                                                                                                                                                                                                                                                                   |                               |             |               |               |              |             |             |                 |            |             |               |               |                                                                                                                                                                                                                                                                                                                                                   |                               |             |               |               |              |             |             |                 |            |             |               |               |
| Normal (116)                                                                                                                                                                                                                                                                                                                                      | 0<br>(0.0%)                   | 0<br>(0.0%)     | 116<br>(100.0%) |               |              |             |                 |                 |            |               |               |               |                                                                                                                                                                                                                                                                                                                                                   |                               |               |               |               |              |             |             |                |            |               |               |                |                                                                                                                                                                                                                                                                                                                                                      |                               |               |               |               |              |             |             |                 |            |               |               |               |                                                                                                                                                                                                                                                                                                                                                     |                               |               |               |               |              |             |             |                 |            |               |               |               |                                                                                                                                                                                                                                                                                                                                                   |                               |             |               |               |              |             |             |                 |            |             |               |               |                                                                                                                                                                                                                                                                                                                                                   |                               |             |               |               |              |             |             |                 |            |             |               |               |
| PDAC (89)                                                                                                                                                                                                                                                                                                                                         | 8<br>(9.0%)                   | 9<br>(10.3%)    | 10<br>(11.5%)   |               |              |             |                 |                 |            |               |               |               |                                                                                                                                                                                                                                                                                                                                                   |                               |               |               |               |              |             |             |                |            |               |               |                |                                                                                                                                                                                                                                                                                                                                                      |                               |               |               |               |              |             |             |                 |            |               |               |               |                                                                                                                                                                                                                                                                                                                                                     |                               |               |               |               |              |             |             |                 |            |               |               |               |                                                                                                                                                                                                                                                                                                                                                   |                               |             |               |               |              |             |             |                 |            |             |               |               |                                                                                                                                                                                                                                                                                                                                                   |                               |             |               |               |              |             |             |                 |            |             |               |               |
| <table border="1"> <tr><td>Gold standard<br/>NonPDAC (97)</td><td>8<br/>(8.2%)</td><td>9<br/>(9.3%)</td><td>8<br/>(8.3%)</td></tr> <tr><td>Normal (116)</td><td>0<br/>(0.0%)</td><td>0<br/>(0.0%)</td><td>116<br/>(100.0%)</td></tr> <tr><td>PDAC (84)</td><td>8<br/>(9.5%)</td><td>9<br/>(10.7%)</td><td>8<br/>(9.5%)</td></tr> </table>         | Gold standard<br>NonPDAC (97) | 8<br>(8.2%)     | 9<br>(9.3%)     | 8<br>(8.3%)   | Normal (116) | 0<br>(0.0%) | 0<br>(0.0%)     | 116<br>(100.0%) | PDAC (84)  | 8<br>(9.5%)   | 9<br>(10.7%)  | 8<br>(9.5%)   | <table border="1"> <tr><td>Gold standard<br/>NonPDAC (97)</td><td>8<br/>(8.2%)</td><td>11<br/>(11.3%)</td><td>10<br/>(10.3%)</td></tr> <tr><td>Normal (116)</td><td>1<br/>(0.9%)</td><td>1<br/>(0.9%)</td><td>113<br/>(97.8%)</td></tr> <tr><td>PDAC (117)</td><td>8<br/>(9.0%)</td><td>11<br/>(12.5%)</td><td>10<br/>(11.3%)</td></tr> </table>  | Gold standard<br>NonPDAC (97) | 8<br>(8.2%)   | 11<br>(11.3%) | 10<br>(10.3%) | Normal (116) | 1<br>(0.9%) | 1<br>(0.9%) | 113<br>(97.8%) | PDAC (117) | 8<br>(9.0%)   | 11<br>(12.5%) | 10<br>(11.3%)  | <table border="1"> <tr><td>Gold standard<br/>NonPDAC (87)</td><td>8<br/>(9.2%)</td><td>17<br/>(19.5%)</td><td>10<br/>(11.5%)</td></tr> <tr><td>Normal (116)</td><td>1<br/>(0.9%)</td><td>0<br/>(0.0%)</td><td>115<br/>(99.1%)</td></tr> <tr><td>PDAC (99)</td><td>8<br/>(9.0%)</td><td>17<br/>(19.5%)</td><td>10<br/>(11.5%)</td></tr> </table>      | Gold standard<br>NonPDAC (87) | 8<br>(9.2%)   | 17<br>(19.5%) | 10<br>(11.5%) | Normal (116) | 1<br>(0.9%) | 0<br>(0.0%) | 115<br>(99.1%)  | PDAC (99)  | 8<br>(9.0%)   | 17<br>(19.5%) | 10<br>(11.5%) | <table border="1"> <tr><td>Gold standard<br/>NonPDAC (87)</td><td>7<br/>(8.0%)</td><td>20<br/>(23.0%)</td><td>10<br/>(11.5%)</td></tr> <tr><td>Normal (116)</td><td>2<br/>(1.7%)</td><td>0<br/>(0.0%)</td><td>114<br/>(98.3%)</td></tr> <tr><td>PDAC (103)</td><td>7<br/>(8.0%)</td><td>20<br/>(23.0%)</td><td>10<br/>(11.5%)</td></tr> </table>    | Gold standard<br>NonPDAC (87) | 7<br>(8.0%)   | 20<br>(23.0%) | 10<br>(11.5%) | Normal (116) | 2<br>(1.7%) | 0<br>(0.0%) | 114<br>(98.3%)  | PDAC (103) | 7<br>(8.0%)   | 20<br>(23.0%) | 10<br>(11.5%) | <table border="1"> <tr><td>Gold standard<br/>NonPDAC (87)</td><td>8<br/>(9.2%)</td><td>8<br/>(9.2%)</td><td>8<br/>(9.2%)</td></tr> <tr><td>Normal (116)</td><td>0<br/>(0.0%)</td><td>0<br/>(0.0%)</td><td>116<br/>(100.0%)</td></tr> <tr><td>PDAC (89)</td><td>8<br/>(9.0%)</td><td>8<br/>(9.0%)</td><td>8<br/>(9.0%)</td></tr> </table>          | Gold standard<br>NonPDAC (87) | 8<br>(9.2%) | 8<br>(9.2%)   | 8<br>(9.2%)   | Normal (116) | 0<br>(0.0%) | 0<br>(0.0%) | 116<br>(100.0%) | PDAC (89)  | 8<br>(9.0%) | 8<br>(9.0%)   | 8<br>(9.0%)   | <table border="1"> <tr><td>Gold standard<br/>NonPDAC (87)</td><td>8<br/>(9.2%)</td><td>9<br/>(10.3%)</td><td>10<br/>(11.5%)</td></tr> <tr><td>Normal (116)</td><td>0<br/>(0.0%)</td><td>0<br/>(0.0%)</td><td>116<br/>(100.0%)</td></tr> <tr><td>PDAC (89)</td><td>8<br/>(9.0%)</td><td>9<br/>(10.3%)</td><td>10<br/>(11.5%)</td></tr> </table>    | Gold standard<br>NonPDAC (87) | 8<br>(9.2%) | 9<br>(10.3%)  | 10<br>(11.5%) | Normal (116) | 0<br>(0.0%) | 0<br>(0.0%) | 116<br>(100.0%) | PDAC (89)  | 8<br>(9.0%) | 9<br>(10.3%)  | 10<br>(11.5%) |
| Gold standard<br>NonPDAC (97)                                                                                                                                                                                                                                                                                                                     | 8<br>(8.2%)                   | 9<br>(9.3%)     | 8<br>(8.3%)     |               |              |             |                 |                 |            |               |               |               |                                                                                                                                                                                                                                                                                                                                                   |                               |               |               |               |              |             |             |                |            |               |               |                |                                                                                                                                                                                                                                                                                                                                                      |                               |               |               |               |              |             |             |                 |            |               |               |               |                                                                                                                                                                                                                                                                                                                                                     |                               |               |               |               |              |             |             |                 |            |               |               |               |                                                                                                                                                                                                                                                                                                                                                   |                               |             |               |               |              |             |             |                 |            |             |               |               |                                                                                                                                                                                                                                                                                                                                                   |                               |             |               |               |              |             |             |                 |            |             |               |               |
| Normal (116)                                                                                                                                                                                                                                                                                                                                      | 0<br>(0.0%)                   | 0<br>(0.0%)     | 116<br>(100.0%) |               |              |             |                 |                 |            |               |               |               |                                                                                                                                                                                                                                                                                                                                                   |                               |               |               |               |              |             |             |                |            |               |               |                |                                                                                                                                                                                                                                                                                                                                                      |                               |               |               |               |              |             |             |                 |            |               |               |               |                                                                                                                                                                                                                                                                                                                                                     |                               |               |               |               |              |             |             |                 |            |               |               |               |                                                                                                                                                                                                                                                                                                                                                   |                               |             |               |               |              |             |             |                 |            |             |               |               |                                                                                                                                                                                                                                                                                                                                                   |                               |             |               |               |              |             |             |                 |            |             |               |               |
| PDAC (84)                                                                                                                                                                                                                                                                                                                                         | 8<br>(9.5%)                   | 9<br>(10.7%)    | 8<br>(9.5%)     |               |              |             |                 |                 |            |               |               |               |                                                                                                                                                                                                                                                                                                                                                   |                               |               |               |               |              |             |             |                |            |               |               |                |                                                                                                                                                                                                                                                                                                                                                      |                               |               |               |               |              |             |             |                 |            |               |               |               |                                                                                                                                                                                                                                                                                                                                                     |                               |               |               |               |              |             |             |                 |            |               |               |               |                                                                                                                                                                                                                                                                                                                                                   |                               |             |               |               |              |             |             |                 |            |             |               |               |                                                                                                                                                                                                                                                                                                                                                   |                               |             |               |               |              |             |             |                 |            |             |               |               |
| Gold standard<br>NonPDAC (97)                                                                                                                                                                                                                                                                                                                     | 8<br>(8.2%)                   | 11<br>(11.3%)   | 10<br>(10.3%)   |               |              |             |                 |                 |            |               |               |               |                                                                                                                                                                                                                                                                                                                                                   |                               |               |               |               |              |             |             |                |            |               |               |                |                                                                                                                                                                                                                                                                                                                                                      |                               |               |               |               |              |             |             |                 |            |               |               |               |                                                                                                                                                                                                                                                                                                                                                     |                               |               |               |               |              |             |             |                 |            |               |               |               |                                                                                                                                                                                                                                                                                                                                                   |                               |             |               |               |              |             |             |                 |            |             |               |               |                                                                                                                                                                                                                                                                                                                                                   |                               |             |               |               |              |             |             |                 |            |             |               |               |
| Normal (116)                                                                                                                                                                                                                                                                                                                                      | 1<br>(0.9%)                   | 1<br>(0.9%)     | 113<br>(97.8%)  |               |              |             |                 |                 |            |               |               |               |                                                                                                                                                                                                                                                                                                                                                   |                               |               |               |               |              |             |             |                |            |               |               |                |                                                                                                                                                                                                                                                                                                                                                      |                               |               |               |               |              |             |             |                 |            |               |               |               |                                                                                                                                                                                                                                                                                                                                                     |                               |               |               |               |              |             |             |                 |            |               |               |               |                                                                                                                                                                                                                                                                                                                                                   |                               |             |               |               |              |             |             |                 |            |             |               |               |                                                                                                                                                                                                                                                                                                                                                   |                               |             |               |               |              |             |             |                 |            |             |               |               |
| PDAC (117)                                                                                                                                                                                                                                                                                                                                        | 8<br>(9.0%)                   | 11<br>(12.5%)   | 10<br>(11.3%)   |               |              |             |                 |                 |            |               |               |               |                                                                                                                                                                                                                                                                                                                                                   |                               |               |               |               |              |             |             |                |            |               |               |                |                                                                                                                                                                                                                                                                                                                                                      |                               |               |               |               |              |             |             |                 |            |               |               |               |                                                                                                                                                                                                                                                                                                                                                     |                               |               |               |               |              |             |             |                 |            |               |               |               |                                                                                                                                                                                                                                                                                                                                                   |                               |             |               |               |              |             |             |                 |            |             |               |               |                                                                                                                                                                                                                                                                                                                                                   |                               |             |               |               |              |             |             |                 |            |             |               |               |
| Gold standard<br>NonPDAC (87)                                                                                                                                                                                                                                                                                                                     | 8<br>(9.2%)                   | 17<br>(19.5%)   | 10<br>(11.5%)   |               |              |             |                 |                 |            |               |               |               |                                                                                                                                                                                                                                                                                                                                                   |                               |               |               |               |              |             |             |                |            |               |               |                |                                                                                                                                                                                                                                                                                                                                                      |                               |               |               |               |              |             |             |                 |            |               |               |               |                                                                                                                                                                                                                                                                                                                                                     |                               |               |               |               |              |             |             |                 |            |               |               |               |                                                                                                                                                                                                                                                                                                                                                   |                               |             |               |               |              |             |             |                 |            |             |               |               |                                                                                                                                                                                                                                                                                                                                                   |                               |             |               |               |              |             |             |                 |            |             |               |               |
| Normal (116)                                                                                                                                                                                                                                                                                                                                      | 1<br>(0.9%)                   | 0<br>(0.0%)     | 115<br>(99.1%)  |               |              |             |                 |                 |            |               |               |               |                                                                                                                                                                                                                                                                                                                                                   |                               |               |               |               |              |             |             |                |            |               |               |                |                                                                                                                                                                                                                                                                                                                                                      |                               |               |               |               |              |             |             |                 |            |               |               |               |                                                                                                                                                                                                                                                                                                                                                     |                               |               |               |               |              |             |             |                 |            |               |               |               |                                                                                                                                                                                                                                                                                                                                                   |                               |             |               |               |              |             |             |                 |            |             |               |               |                                                                                                                                                                                                                                                                                                                                                   |                               |             |               |               |              |             |             |                 |            |             |               |               |
| PDAC (99)                                                                                                                                                                                                                                                                                                                                         | 8<br>(9.0%)                   | 17<br>(19.5%)   | 10<br>(11.5%)   |               |              |             |                 |                 |            |               |               |               |                                                                                                                                                                                                                                                                                                                                                   |                               |               |               |               |              |             |             |                |            |               |               |                |                                                                                                                                                                                                                                                                                                                                                      |                               |               |               |               |              |             |             |                 |            |               |               |               |                                                                                                                                                                                                                                                                                                                                                     |                               |               |               |               |              |             |             |                 |            |               |               |               |                                                                                                                                                                                                                                                                                                                                                   |                               |             |               |               |              |             |             |                 |            |             |               |               |                                                                                                                                                                                                                                                                                                                                                   |                               |             |               |               |              |             |             |                 |            |             |               |               |
| Gold standard<br>NonPDAC (87)                                                                                                                                                                                                                                                                                                                     | 7<br>(8.0%)                   | 20<br>(23.0%)   | 10<br>(11.5%)   |               |              |             |                 |                 |            |               |               |               |                                                                                                                                                                                                                                                                                                                                                   |                               |               |               |               |              |             |             |                |            |               |               |                |                                                                                                                                                                                                                                                                                                                                                      |                               |               |               |               |              |             |             |                 |            |               |               |               |                                                                                                                                                                                                                                                                                                                                                     |                               |               |               |               |              |             |             |                 |            |               |               |               |                                                                                                                                                                                                                                                                                                                                                   |                               |             |               |               |              |             |             |                 |            |             |               |               |                                                                                                                                                                                                                                                                                                                                                   |                               |             |               |               |              |             |             |                 |            |             |               |               |
| Normal (116)                                                                                                                                                                                                                                                                                                                                      | 2<br>(1.7%)                   | 0<br>(0.0%)     | 114<br>(98.3%)  |               |              |             |                 |                 |            |               |               |               |                                                                                                                                                                                                                                                                                                                                                   |                               |               |               |               |              |             |             |                |            |               |               |                |                                                                                                                                                                                                                                                                                                                                                      |                               |               |               |               |              |             |             |                 |            |               |               |               |                                                                                                                                                                                                                                                                                                                                                     |                               |               |               |               |              |             |             |                 |            |               |               |               |                                                                                                                                                                                                                                                                                                                                                   |                               |             |               |               |              |             |             |                 |            |             |               |               |                                                                                                                                                                                                                                                                                                                                                   |                               |             |               |               |              |             |             |                 |            |             |               |               |
| PDAC (103)                                                                                                                                                                                                                                                                                                                                        | 7<br>(8.0%)                   | 20<br>(23.0%)   | 10<br>(11.5%)   |               |              |             |                 |                 |            |               |               |               |                                                                                                                                                                                                                                                                                                                                                   |                               |               |               |               |              |             |             |                |            |               |               |                |                                                                                                                                                                                                                                                                                                                                                      |                               |               |               |               |              |             |             |                 |            |               |               |               |                                                                                                                                                                                                                                                                                                                                                     |                               |               |               |               |              |             |             |                 |            |               |               |               |                                                                                                                                                                                                                                                                                                                                                   |                               |             |               |               |              |             |             |                 |            |             |               |               |                                                                                                                                                                                                                                                                                                                                                   |                               |             |               |               |              |             |             |                 |            |             |               |               |
| Gold standard<br>NonPDAC (87)                                                                                                                                                                                                                                                                                                                     | 8<br>(9.2%)                   | 8<br>(9.2%)     | 8<br>(9.2%)     |               |              |             |                 |                 |            |               |               |               |                                                                                                                                                                                                                                                                                                                                                   |                               |               |               |               |              |             |             |                |            |               |               |                |                                                                                                                                                                                                                                                                                                                                                      |                               |               |               |               |              |             |             |                 |            |               |               |               |                                                                                                                                                                                                                                                                                                                                                     |                               |               |               |               |              |             |             |                 |            |               |               |               |                                                                                                                                                                                                                                                                                                                                                   |                               |             |               |               |              |             |             |                 |            |             |               |               |                                                                                                                                                                                                                                                                                                                                                   |                               |             |               |               |              |             |             |                 |            |             |               |               |
| Normal (116)                                                                                                                                                                                                                                                                                                                                      | 0<br>(0.0%)                   | 0<br>(0.0%)     | 116<br>(100.0%) |               |              |             |                 |                 |            |               |               |               |                                                                                                                                                                                                                                                                                                                                                   |                               |               |               |               |              |             |             |                |            |               |               |                |                                                                                                                                                                                                                                                                                                                                                      |                               |               |               |               |              |             |             |                 |            |               |               |               |                                                                                                                                                                                                                                                                                                                                                     |                               |               |               |               |              |             |             |                 |            |               |               |               |                                                                                                                                                                                                                                                                                                                                                   |                               |             |               |               |              |             |             |                 |            |             |               |               |                                                                                                                                                                                                                                                                                                                                                   |                               |             |               |               |              |             |             |                 |            |             |               |               |
| PDAC (89)                                                                                                                                                                                                                                                                                                                                         | 8<br>(9.0%)                   | 8<br>(9.0%)     | 8<br>(9.0%)     |               |              |             |                 |                 |            |               |               |               |                                                                                                                                                                                                                                                                                                                                                   |                               |               |               |               |              |             |             |                |            |               |               |                |                                                                                                                                                                                                                                                                                                                                                      |                               |               |               |               |              |             |             |                 |            |               |               |               |                                                                                                                                                                                                                                                                                                                                                     |                               |               |               |               |              |             |             |                 |            |               |               |               |                                                                                                                                                                                                                                                                                                                                                   |                               |             |               |               |              |             |             |                 |            |             |               |               |                                                                                                                                                                                                                                                                                                                                                   |                               |             |               |               |              |             |             |                 |            |             |               |               |
| Gold standard<br>NonPDAC (87)                                                                                                                                                                                                                                                                                                                     | 8<br>(9.2%)                   | 9<br>(10.3%)    | 10<br>(11.5%)   |               |              |             |                 |                 |            |               |               |               |                                                                                                                                                                                                                                                                                                                                                   |                               |               |               |               |              |             |             |                |            |               |               |                |                                                                                                                                                                                                                                                                                                                                                      |                               |               |               |               |              |             |             |                 |            |               |               |               |                                                                                                                                                                                                                                                                                                                                                     |                               |               |               |               |              |             |             |                 |            |               |               |               |                                                                                                                                                                                                                                                                                                                                                   |                               |             |               |               |              |             |             |                 |            |             |               |               |                                                                                                                                                                                                                                                                                                                                                   |                               |             |               |               |              |             |             |                 |            |             |               |               |
| Normal (116)                                                                                                                                                                                                                                                                                                                                      | 0<br>(0.0%)                   | 0<br>(0.0%)     | 116<br>(100.0%) |               |              |             |                 |                 |            |               |               |               |                                                                                                                                                                                                                                                                                                                                                   |                               |               |               |               |              |             |             |                |            |               |               |                |                                                                                                                                                                                                                                                                                                                                                      |                               |               |               |               |              |             |             |                 |            |               |               |               |                                                                                                                                                                                                                                                                                                                                                     |                               |               |               |               |              |             |             |                 |            |               |               |               |                                                                                                                                                                                                                                                                                                                                                   |                               |             |               |               |              |             |             |                 |            |             |               |               |                                                                                                                                                                                                                                                                                                                                                   |                               |             |               |               |              |             |             |                 |            |             |               |               |
| PDAC (89)                                                                                                                                                                                                                                                                                                                                         | 8<br>(9.0%)                   | 9<br>(10.3%)    | 10<br>(11.5%)   |               |              |             |                 |                 |            |               |               |               |                                                                                                                                                                                                                                                                                                                                                   |                               |               |               |               |              |             |             |                |            |               |               |                |                                                                                                                                                                                                                                                                                                                                                      |                               |               |               |               |              |             |             |                 |            |               |               |               |                                                                                                                                                                                                                                                                                                                                                     |                               |               |               |               |              |             |             |                 |            |               |               |               |                                                                                                                                                                                                                                                                                                                                                   |                               |             |               |               |              |             |             |                 |            |             |               |               |                                                                                                                                                                                                                                                                                                                                                   |                               |             |               |               |              |             |             |                 |            |             |               |               |
| <table border="1"> <tr><td>Gold standard<br/>NonPDAC (97)</td><td>13<br/>(13.4%)</td><td>47<br/>(48.4%)</td><td>7<br/>(7.2%)</td></tr> <tr><td>Normal (116)</td><td>1<br/>(0.9%)</td><td>2<br/>(1.7%)</td><td>113<br/>(97.4%)</td></tr> <tr><td>PDAC (89)</td><td>13<br/>(14.8%)</td><td>47<br/>(53.0%)</td><td>7<br/>(7.8%)</td></tr> </table>   | Gold standard<br>NonPDAC (97) | 13<br>(13.4%)   | 47<br>(48.4%)   | 7<br>(7.2%)   | Normal (116) | 1<br>(0.9%) | 2<br>(1.7%)     | 113<br>(97.4%)  | PDAC (89)  | 13<br>(14.8%) | 47<br>(53.0%) | 7<br>(7.8%)   | <table border="1"> <tr><td>Gold standard<br/>NonPDAC (97)</td><td>9<br/>(9.3%)</td><td>52<br/>(53.6%)</td><td>9<br/>(9.3%)</td></tr> <tr><td>Normal (116)</td><td>1<br/>(0.9%)</td><td>0<br/>(0.0%)</td><td>115<br/>(99.1%)</td></tr> <tr><td>PDAC (92)</td><td>9<br/>(10.0%)</td><td>52<br/>(58.7%)</td><td>9<br/>(10.0%)</td></tr> </table>     | Gold standard<br>NonPDAC (97) | 9<br>(9.3%)   | 52<br>(53.6%) | 9<br>(9.3%)   | Normal (116) | 1<br>(0.9%) | 0<br>(0.0%) | 115<br>(99.1%) | PDAC (92)  | 9<br>(10.0%)  | 52<br>(58.7%) | 9<br>(10.0%)   | <table border="1"> <tr><td>Gold standard<br/>NonPDAC (87)</td><td>9<br/>(10.3%)</td><td>16<br/>(18.3%)</td><td>9<br/>(10.3%)</td></tr> <tr><td>Normal (116)</td><td>0<br/>(0.0%)</td><td>0<br/>(0.0%)</td><td>116<br/>(100.0%)</td></tr> <tr><td>PDAC (103)</td><td>9<br/>(10.3%)</td><td>16<br/>(18.3%)</td><td>9<br/>(10.3%)</td></tr> </table>    | Gold standard<br>NonPDAC (87) | 9<br>(10.3%)  | 16<br>(18.3%) | 9<br>(10.3%)  | Normal (116) | 0<br>(0.0%) | 0<br>(0.0%) | 116<br>(100.0%) | PDAC (103) | 9<br>(10.3%)  | 16<br>(18.3%) | 9<br>(10.3%)  | <table border="1"> <tr><td>Gold standard<br/>NonPDAC (87)</td><td>7<br/>(8.0%)</td><td>20<br/>(23.0%)</td><td>10<br/>(11.5%)</td></tr> <tr><td>Normal (116)</td><td>0<br/>(0.0%)</td><td>0<br/>(0.0%)</td><td>116<br/>(100.0%)</td></tr> <tr><td>PDAC (89)</td><td>7<br/>(7.8%)</td><td>20<br/>(22.8%)</td><td>10<br/>(11.5%)</td></tr> </table>    | Gold standard<br>NonPDAC (87) | 7<br>(8.0%)   | 20<br>(23.0%) | 10<br>(11.5%) | Normal (116) | 0<br>(0.0%) | 0<br>(0.0%) | 116<br>(100.0%) | PDAC (89)  | 7<br>(7.8%)   | 20<br>(22.8%) | 10<br>(11.5%) | <table border="1"> <tr><td>Gold standard<br/>NonPDAC (87)</td><td>8<br/>(9.2%)</td><td>9<br/>(10.3%)</td><td>10<br/>(11.5%)</td></tr> <tr><td>Normal (116)</td><td>0<br/>(0.0%)</td><td>0<br/>(0.0%)</td><td>116<br/>(100.0%)</td></tr> <tr><td>PDAC (89)</td><td>8<br/>(9.0%)</td><td>9<br/>(10.3%)</td><td>10<br/>(11.5%)</td></tr> </table>    | Gold standard<br>NonPDAC (87) | 8<br>(9.2%) | 9<br>(10.3%)  | 10<br>(11.5%) | Normal (116) | 0<br>(0.0%) | 0<br>(0.0%) | 116<br>(100.0%) | PDAC (89)  | 8<br>(9.0%) | 9<br>(10.3%)  | 10<br>(11.5%) | <table border="1"> <tr><td>Gold standard<br/>NonPDAC (87)</td><td>8<br/>(9.2%)</td><td>9<br/>(10.3%)</td><td>10<br/>(11.5%)</td></tr> <tr><td>Normal (116)</td><td>0<br/>(0.0%)</td><td>0<br/>(0.0%)</td><td>116<br/>(100.0%)</td></tr> <tr><td>PDAC (89)</td><td>8<br/>(9.0%)</td><td>9<br/>(10.3%)</td><td>10<br/>(11.5%)</td></tr> </table>    | Gold standard<br>NonPDAC (87) | 8<br>(9.2%) | 9<br>(10.3%)  | 10<br>(11.5%) | Normal (116) | 0<br>(0.0%) | 0<br>(0.0%) | 116<br>(100.0%) | PDAC (89)  | 8<br>(9.0%) | 9<br>(10.3%)  | 10<br>(11.5%) |
| Gold standard<br>NonPDAC (97)                                                                                                                                                                                                                                                                                                                     | 13<br>(13.4%)                 | 47<br>(48.4%)   | 7<br>(7.2%)     |               |              |             |                 |                 |            |               |               |               |                                                                                                                                                                                                                                                                                                                                                   |                               |               |               |               |              |             |             |                |            |               |               |                |                                                                                                                                                                                                                                                                                                                                                      |                               |               |               |               |              |             |             |                 |            |               |               |               |                                                                                                                                                                                                                                                                                                                                                     |                               |               |               |               |              |             |             |                 |            |               |               |               |                                                                                                                                                                                                                                                                                                                                                   |                               |             |               |               |              |             |             |                 |            |             |               |               |                                                                                                                                                                                                                                                                                                                                                   |                               |             |               |               |              |             |             |                 |            |             |               |               |
| Normal (116)                                                                                                                                                                                                                                                                                                                                      | 1<br>(0.9%)                   | 2<br>(1.7%)     | 113<br>(97.4%)  |               |              |             |                 |                 |            |               |               |               |                                                                                                                                                                                                                                                                                                                                                   |                               |               |               |               |              |             |             |                |            |               |               |                |                                                                                                                                                                                                                                                                                                                                                      |                               |               |               |               |              |             |             |                 |            |               |               |               |                                                                                                                                                                                                                                                                                                                                                     |                               |               |               |               |              |             |             |                 |            |               |               |               |                                                                                                                                                                                                                                                                                                                                                   |                               |             |               |               |              |             |             |                 |            |             |               |               |                                                                                                                                                                                                                                                                                                                                                   |                               |             |               |               |              |             |             |                 |            |             |               |               |
| PDAC (89)                                                                                                                                                                                                                                                                                                                                         | 13<br>(14.8%)                 | 47<br>(53.0%)   | 7<br>(7.8%)     |               |              |             |                 |                 |            |               |               |               |                                                                                                                                                                                                                                                                                                                                                   |                               |               |               |               |              |             |             |                |            |               |               |                |                                                                                                                                                                                                                                                                                                                                                      |                               |               |               |               |              |             |             |                 |            |               |               |               |                                                                                                                                                                                                                                                                                                                                                     |                               |               |               |               |              |             |             |                 |            |               |               |               |                                                                                                                                                                                                                                                                                                                                                   |                               |             |               |               |              |             |             |                 |            |             |               |               |                                                                                                                                                                                                                                                                                                                                                   |                               |             |               |               |              |             |             |                 |            |             |               |               |
| Gold standard<br>NonPDAC (97)                                                                                                                                                                                                                                                                                                                     | 9<br>(9.3%)                   | 52<br>(53.6%)   | 9<br>(9.3%)     |               |              |             |                 |                 |            |               |               |               |                                                                                                                                                                                                                                                                                                                                                   |                               |               |               |               |              |             |             |                |            |               |               |                |                                                                                                                                                                                                                                                                                                                                                      |                               |               |               |               |              |             |             |                 |            |               |               |               |                                                                                                                                                                                                                                                                                                                                                     |                               |               |               |               |              |             |             |                 |            |               |               |               |                                                                                                                                                                                                                                                                                                                                                   |                               |             |               |               |              |             |             |                 |            |             |               |               |                                                                                                                                                                                                                                                                                                                                                   |                               |             |               |               |              |             |             |                 |            |             |               |               |
| Normal (116)                                                                                                                                                                                                                                                                                                                                      | 1<br>(0.9%)                   | 0<br>(0.0%)     | 115<br>(99.1%)  |               |              |             |                 |                 |            |               |               |               |                                                                                                                                                                                                                                                                                                                                                   |                               |               |               |               |              |             |             |                |            |               |               |                |                                                                                                                                                                                                                                                                                                                                                      |                               |               |               |               |              |             |             |                 |            |               |               |               |                                                                                                                                                                                                                                                                                                                                                     |                               |               |               |               |              |             |             |                 |            |               |               |               |                                                                                                                                                                                                                                                                                                                                                   |                               |             |               |               |              |             |             |                 |            |             |               |               |                                                                                                                                                                                                                                                                                                                                                   |                               |             |               |               |              |             |             |                 |            |             |               |               |
| PDAC (92)                                                                                                                                                                                                                                                                                                                                         | 9<br>(10.0%)                  | 52<br>(58.7%)   | 9<br>(10.0%)    |               |              |             |                 |                 |            |               |               |               |                                                                                                                                                                                                                                                                                                                                                   |                               |               |               |               |              |             |             |                |            |               |               |                |                                                                                                                                                                                                                                                                                                                                                      |                               |               |               |               |              |             |             |                 |            |               |               |               |                                                                                                                                                                                                                                                                                                                                                     |                               |               |               |               |              |             |             |                 |            |               |               |               |                                                                                                                                                                                                                                                                                                                                                   |                               |             |               |               |              |             |             |                 |            |             |               |               |                                                                                                                                                                                                                                                                                                                                                   |                               |             |               |               |              |             |             |                 |            |             |               |               |
| Gold standard<br>NonPDAC (87)                                                                                                                                                                                                                                                                                                                     | 9<br>(10.3%)                  | 16<br>(18.3%)   | 9<br>(10.3%)    |               |              |             |                 |                 |            |               |               |               |                                                                                                                                                                                                                                                                                                                                                   |                               |               |               |               |              |             |             |                |            |               |               |                |                                                                                                                                                                                                                                                                                                                                                      |                               |               |               |               |              |             |             |                 |            |               |               |               |                                                                                                                                                                                                                                                                                                                                                     |                               |               |               |               |              |             |             |                 |            |               |               |               |                                                                                                                                                                                                                                                                                                                                                   |                               |             |               |               |              |             |             |                 |            |             |               |               |                                                                                                                                                                                                                                                                                                                                                   |                               |             |               |               |              |             |             |                 |            |             |               |               |
| Normal (116)                                                                                                                                                                                                                                                                                                                                      | 0<br>(0.0%)                   | 0<br>(0.0%)     | 116<br>(100.0%) |               |              |             |                 |                 |            |               |               |               |                                                                                                                                                                                                                                                                                                                                                   |                               |               |               |               |              |             |             |                |            |               |               |                |                                                                                                                                                                                                                                                                                                                                                      |                               |               |               |               |              |             |             |                 |            |               |               |               |                                                                                                                                                                                                                                                                                                                                                     |                               |               |               |               |              |             |             |                 |            |               |               |               |                                                                                                                                                                                                                                                                                                                                                   |                               |             |               |               |              |             |             |                 |            |             |               |               |                                                                                                                                                                                                                                                                                                                                                   |                               |             |               |               |              |             |             |                 |            |             |               |               |
| PDAC (103)                                                                                                                                                                                                                                                                                                                                        | 9<br>(10.3%)                  | 16<br>(18.3%)   | 9<br>(10.3%)    |               |              |             |                 |                 |            |               |               |               |                                                                                                                                                                                                                                                                                                                                                   |                               |               |               |               |              |             |             |                |            |               |               |                |                                                                                                                                                                                                                                                                                                                                                      |                               |               |               |               |              |             |             |                 |            |               |               |               |                                                                                                                                                                                                                                                                                                                                                     |                               |               |               |               |              |             |             |                 |            |               |               |               |                                                                                                                                                                                                                                                                                                                                                   |                               |             |               |               |              |             |             |                 |            |             |               |               |                                                                                                                                                                                                                                                                                                                                                   |                               |             |               |               |              |             |             |                 |            |             |               |               |
| Gold standard<br>NonPDAC (87)                                                                                                                                                                                                                                                                                                                     | 7<br>(8.0%)                   | 20<br>(23.0%)   | 10<br>(11.5%)   |               |              |             |                 |                 |            |               |               |               |                                                                                                                                                                                                                                                                                                                                                   |                               |               |               |               |              |             |             |                |            |               |               |                |                                                                                                                                                                                                                                                                                                                                                      |                               |               |               |               |              |             |             |                 |            |               |               |               |                                                                                                                                                                                                                                                                                                                                                     |                               |               |               |               |              |             |             |                 |            |               |               |               |                                                                                                                                                                                                                                                                                                                                                   |                               |             |               |               |              |             |             |                 |            |             |               |               |                                                                                                                                                                                                                                                                                                                                                   |                               |             |               |               |              |             |             |                 |            |             |               |               |
| Normal (116)                                                                                                                                                                                                                                                                                                                                      | 0<br>(0.0%)                   | 0<br>(0.0%)     | 116<br>(100.0%) |               |              |             |                 |                 |            |               |               |               |                                                                                                                                                                                                                                                                                                                                                   |                               |               |               |               |              |             |             |                |            |               |               |                |                                                                                                                                                                                                                                                                                                                                                      |                               |               |               |               |              |             |             |                 |            |               |               |               |                                                                                                                                                                                                                                                                                                                                                     |                               |               |               |               |              |             |             |                 |            |               |               |               |                                                                                                                                                                                                                                                                                                                                                   |                               |             |               |               |              |             |             |                 |            |             |               |               |                                                                                                                                                                                                                                                                                                                                                   |                               |             |               |               |              |             |             |                 |            |             |               |               |
| PDAC (89)                                                                                                                                                                                                                                                                                                                                         | 7<br>(7.8%)                   | 20<br>(22.8%)   | 10<br>(11.5%)   |               |              |             |                 |                 |            |               |               |               |                                                                                                                                                                                                                                                                                                                                                   |                               |               |               |               |              |             |             |                |            |               |               |                |                                                                                                                                                                                                                                                                                                                                                      |                               |               |               |               |              |             |             |                 |            |               |               |               |                                                                                                                                                                                                                                                                                                                                                     |                               |               |               |               |              |             |             |                 |            |               |               |               |                                                                                                                                                                                                                                                                                                                                                   |                               |             |               |               |              |             |             |                 |            |             |               |               |                                                                                                                                                                                                                                                                                                                                                   |                               |             |               |               |              |             |             |                 |            |             |               |               |
| Gold standard<br>NonPDAC (87)                                                                                                                                                                                                                                                                                                                     | 8<br>(9.2%)                   | 9<br>(10.3%)    | 10<br>(11.5%)   |               |              |             |                 |                 |            |               |               |               |                                                                                                                                                                                                                                                                                                                                                   |                               |               |               |               |              |             |             |                |            |               |               |                |                                                                                                                                                                                                                                                                                                                                                      |                               |               |               |               |              |             |             |                 |            |               |               |               |                                                                                                                                                                                                                                                                                                                                                     |                               |               |               |               |              |             |             |                 |            |               |               |               |                                                                                                                                                                                                                                                                                                                                                   |                               |             |               |               |              |             |             |                 |            |             |               |               |                                                                                                                                                                                                                                                                                                                                                   |                               |             |               |               |              |             |             |                 |            |             |               |               |
| Normal (116)                                                                                                                                                                                                                                                                                                                                      | 0<br>(0.0%)                   | 0<br>(0.0%)     | 116<br>(100.0%) |               |              |             |                 |                 |            |               |               |               |                                                                                                                                                                                                                                                                                                                                                   |                               |               |               |               |              |             |             |                |            |               |               |                |                                                                                                                                                                                                                                                                                                                                                      |                               |               |               |               |              |             |             |                 |            |               |               |               |                                                                                                                                                                                                                                                                                                                                                     |                               |               |               |               |              |             |             |                 |            |               |               |               |                                                                                                                                                                                                                                                                                                                                                   |                               |             |               |               |              |             |             |                 |            |             |               |               |                                                                                                                                                                                                                                                                                                                                                   |                               |             |               |               |              |             |             |                 |            |             |               |               |
| PDAC (89)                                                                                                                                                                                                                                                                                                                                         | 8<br>(9.0%)                   | 9<br>(10.3%)    | 10<br>(11.5%)   |               |              |             |                 |                 |            |               |               |               |                                                                                                                                                                                                                                                                                                                                                   |                               |               |               |               |              |             |             |                |            |               |               |                |                                                                                                                                                                                                                                                                                                                                                      |                               |               |               |               |              |             |             |                 |            |               |               |               |                                                                                                                                                                                                                                                                                                                                                     |                               |               |               |               |              |             |             |                 |            |               |               |               |                                                                                                                                                                                                                                                                                                                                                   |                               |             |               |               |              |             |             |                 |            |             |               |               |                                                                                                                                                                                                                                                                                                                                                   |                               |             |               |               |              |             |             |                 |            |             |               |               |
| Gold standard<br>NonPDAC (87)                                                                                                                                                                                                                                                                                                                     | 8<br>(9.2%)                   | 9<br>(10.3%)    | 10<br>(11.5%)   |               |              |             |                 |                 |            |               |               |               |                                                                                                                                                                                                                                                                                                                                                   |                               |               |               |               |              |             |             |                |            |               |               |                |                                                                                                                                                                                                                                                                                                                                                      |                               |               |               |               |              |             |             |                 |            |               |               |               |                                                                                                                                                                                                                                                                                                                                                     |                               |               |               |               |              |             |             |                 |            |               |               |               |                                                                                                                                                                                                                                                                                                                                                   |                               |             |               |               |              |             |             |                 |            |             |               |               |                                                                                                                                                                                                                                                                                                                                                   |                               |             |               |               |              |             |             |                 |            |             |               |               |
| Normal (116)                                                                                                                                                                                                                                                                                                                                      | 0<br>(0.0%)                   | 0<br>(0.0%)     | 116<br>(100.0%) |               |              |             |                 |                 |            |               |               |               |                                                                                                                                                                                                                                                                                                                                                   |                               |               |               |               |              |             |             |                |            |               |               |                |                                                                                                                                                                                                                                                                                                                                                      |                               |               |               |               |              |             |             |                 |            |               |               |               |                                                                                                                                                                                                                                                                                                                                                     |                               |               |               |               |              |             |             |                 |            |               |               |               |                                                                                                                                                                                                                                                                                                                                                   |                               |             |               |               |              |             |             |                 |            |             |               |               |                                                                                                                                                                                                                                                                                                                                                   |                               |             |               |               |              |             |             |                 |            |             |               |               |
| PDAC (89)                                                                                                                                                                                                                                                                                                                                         | 8<br>(9.0%)                   | 9<br>(10.3%)    | 10<br>(11.5%)   |               |              |             |                 |                 |            |               |               |               |                                                                                                                                                                                                                                                                                                                                                   |                               |               |               |               |              |             |             |                |            |               |               |                |                                                                                                                                                                                                                                                                                                                                                      |                               |               |               |               |              |             |             |                 |            |               |               |               |                                                                                                                                                                                                                                                                                                                                                     |                               |               |               |               |              |             |             |                 |            |               |               |               |                                                                                                                                                                                                                                                                                                                                                   |                               |             |               |               |              |             |             |                 |            |             |               |               |                                                                                                                                                                                                                                                                                                                                                   |                               |             |               |               |              |             |             |                 |            |             |               |               |
| <table border="1"> <tr><td>Gold standard<br/>NonPDAC (97)</td><td>10<br/>(10.3%)</td><td>14<br/>(14.4%)</td><td>4<br/>(4.0%)</td></tr> <tr><td>Normal (116)</td><td>0<br/>(0.0%)</td><td>0<br/>(0.0%)</td><td>116<br/>(100.0%)</td></tr> <tr><td>PDAC (104)</td><td>10<br/>(11.5%)</td><td>14<br/>(15.9%)</td><td>4<br/>(4.5%)</td></tr> </table> | Gold standard<br>NonPDAC (97) | 10<br>(10.3%)   | 14<br>(14.4%)   | 4<br>(4.0%)   | Normal (116) | 0<br>(0.0%) | 0<br>(0.0%)     | 116<br>(100.0%) | PDAC (104) | 10<br>(11.5%) | 14<br>(15.9%) | 4<br>(4.5%)   | <table border="1"> <tr><td>Gold standard<br/>NonPDAC (97)</td><td>8<br/>(8.2%)</td><td>11<br/>(11.3%)</td><td>10<br/>(10.3%)</td></tr> <tr><td>Normal (116)</td><td>1<br/>(0.9%)</td><td>1<br/>(0.9%)</td><td>114<br/>(98.3%)</td></tr> <tr><td>PDAC (96)</td><td>8<br/>(9.0%)</td><td>11<br/>(12.5%)</td><td>10<br/>(11.3%)</td></tr> </table>   | Gold standard<br>NonPDAC (97) | 8<br>(8.2%)   | 11<br>(11.3%) | 10<br>(10.3%) | Normal (116) | 1<br>(0.9%) | 1<br>(0.9%) | 114<br>(98.3%) | PDAC (96)  | 8<br>(9.0%)   | 11<br>(12.5%) | 10<br>(11.3%)  | <table border="1"> <tr><td>Gold standard<br/>NonPDAC (87)</td><td>8<br/>(9.2%)</td><td>16<br/>(18.3%)</td><td>11<br/>(12.5%)</td></tr> <tr><td>Normal (116)</td><td>0<br/>(0.0%)</td><td>4<br/>(3.4%)</td><td>112<br/>(96.6%)</td></tr> <tr><td>PDAC (85)</td><td>8<br/>(9.0%)</td><td>16<br/>(18.3%)</td><td>11<br/>(12.5%)</td></tr> </table>      | Gold standard<br>NonPDAC (87) | 8<br>(9.2%)   | 16<br>(18.3%) | 11<br>(12.5%) | Normal (116) | 0<br>(0.0%) | 4<br>(3.4%) | 112<br>(96.6%)  | PDAC (85)  | 8<br>(9.0%)   | 16<br>(18.3%) | 11<br>(12.5%) | <table border="1"> <tr><td>Gold standard<br/>NonPDAC (87)</td><td>9<br/>(10.3%)</td><td>13<br/>(15.0%)</td><td>15<br/>(17.2%)</td></tr> <tr><td>Normal (116)</td><td>0<br/>(0.0%)</td><td>0<br/>(0.0%)</td><td>116<br/>(100.0%)</td></tr> <tr><td>PDAC (106)</td><td>9<br/>(10.3%)</td><td>13<br/>(15.0%)</td><td>15<br/>(17.2%)</td></tr> </table> | Gold standard<br>NonPDAC (87) | 9<br>(10.3%)  | 13<br>(15.0%) | 15<br>(17.2%) | Normal (116) | 0<br>(0.0%) | 0<br>(0.0%) | 116<br>(100.0%) | PDAC (106) | 9<br>(10.3%)  | 13<br>(15.0%) | 15<br>(17.2%) | <table border="1"> <tr><td>Gold standard<br/>NonPDAC (87)</td><td>8<br/>(9.2%)</td><td>9<br/>(10.3%)</td><td>10<br/>(11.5%)</td></tr> <tr><td>Normal (116)</td><td>0<br/>(0.0%)</td><td>0<br/>(0.0%)</td><td>116<br/>(100.0%)</td></tr> <tr><td>PDAC (89)</td><td>8<br/>(9.0%)</td><td>9<br/>(10.3%)</td><td>10<br/>(11.5%)</td></tr> </table>    | Gold standard<br>NonPDAC (87) | 8<br>(9.2%) | 9<br>(10.3%)  | 10<br>(11.5%) | Normal (116) | 0<br>(0.0%) | 0<br>(0.0%) | 116<br>(100.0%) | PDAC (89)  | 8<br>(9.0%) | 9<br>(10.3%)  | 10<br>(11.5%) | <table border="1"> <tr><td>Gold standard<br/>NonPDAC (87)</td><td>8<br/>(9.2%)</td><td>9<br/>(10.3%)</td><td>10<br/>(11.5%)</td></tr> <tr><td>Normal (116)</td><td>0<br/>(0.0%)</td><td>0<br/>(0.0%)</td><td>116<br/>(100.0%)</td></tr> <tr><td>PDAC (89)</td><td>8<br/>(9.0%)</td><td>9<br/>(10.3%)</td><td>10<br/>(11.5%)</td></tr> </table>    | Gold standard<br>NonPDAC (87) | 8<br>(9.2%) | 9<br>(10.3%)  | 10<br>(11.5%) | Normal (116) | 0<br>(0.0%) | 0<br>(0.0%) | 116<br>(100.0%) | PDAC (89)  | 8<br>(9.0%) | 9<br>(10.3%)  | 10<br>(11.5%) |
| Gold standard<br>NonPDAC (97)                                                                                                                                                                                                                                                                                                                     | 10<br>(10.3%)                 | 14<br>(14.4%)   | 4<br>(4.0%)     |               |              |             |                 |                 |            |               |               |               |                                                                                                                                                                                                                                                                                                                                                   |                               |               |               |               |              |             |             |                |            |               |               |                |                                                                                                                                                                                                                                                                                                                                                      |                               |               |               |               |              |             |             |                 |            |               |               |               |                                                                                                                                                                                                                                                                                                                                                     |                               |               |               |               |              |             |             |                 |            |               |               |               |                                                                                                                                                                                                                                                                                                                                                   |                               |             |               |               |              |             |             |                 |            |             |               |               |                                                                                                                                                                                                                                                                                                                                                   |                               |             |               |               |              |             |             |                 |            |             |               |               |
| Normal (116)                                                                                                                                                                                                                                                                                                                                      | 0<br>(0.0%)                   | 0<br>(0.0%)     | 116<br>(100.0%) |               |              |             |                 |                 |            |               |               |               |                                                                                                                                                                                                                                                                                                                                                   |                               |               |               |               |              |             |             |                |            |               |               |                |                                                                                                                                                                                                                                                                                                                                                      |                               |               |               |               |              |             |             |                 |            |               |               |               |                                                                                                                                                                                                                                                                                                                                                     |                               |               |               |               |              |             |             |                 |            |               |               |               |                                                                                                                                                                                                                                                                                                                                                   |                               |             |               |               |              |             |             |                 |            |             |               |               |                                                                                                                                                                                                                                                                                                                                                   |                               |             |               |               |              |             |             |                 |            |             |               |               |
| PDAC (104)                                                                                                                                                                                                                                                                                                                                        | 10<br>(11.5%)                 | 14<br>(15.9%)   | 4<br>(4.5%)     |               |              |             |                 |                 |            |               |               |               |                                                                                                                                                                                                                                                                                                                                                   |                               |               |               |               |              |             |             |                |            |               |               |                |                                                                                                                                                                                                                                                                                                                                                      |                               |               |               |               |              |             |             |                 |            |               |               |               |                                                                                                                                                                                                                                                                                                                                                     |                               |               |               |               |              |             |             |                 |            |               |               |               |                                                                                                                                                                                                                                                                                                                                                   |                               |             |               |               |              |             |             |                 |            |             |               |               |                                                                                                                                                                                                                                                                                                                                                   |                               |             |               |               |              |             |             |                 |            |             |               |               |
| Gold standard<br>NonPDAC (97)                                                                                                                                                                                                                                                                                                                     | 8<br>(8.2%)                   | 11<br>(11.3%)   | 10<br>(10.3%)   |               |              |             |                 |                 |            |               |               |               |                                                                                                                                                                                                                                                                                                                                                   |                               |               |               |               |              |             |             |                |            |               |               |                |                                                                                                                                                                                                                                                                                                                                                      |                               |               |               |               |              |             |             |                 |            |               |               |               |                                                                                                                                                                                                                                                                                                                                                     |                               |               |               |               |              |             |             |                 |            |               |               |               |                                                                                                                                                                                                                                                                                                                                                   |                               |             |               |               |              |             |             |                 |            |             |               |               |                                                                                                                                                                                                                                                                                                                                                   |                               |             |               |               |              |             |             |                 |            |             |               |               |
| Normal (116)                                                                                                                                                                                                                                                                                                                                      | 1<br>(0.9%)                   | 1<br>(0.9%)     | 114<br>(98.3%)  |               |              |             |                 |                 |            |               |               |               |                                                                                                                                                                                                                                                                                                                                                   |                               |               |               |               |              |             |             |                |            |               |               |                |                                                                                                                                                                                                                                                                                                                                                      |                               |               |               |               |              |             |             |                 |            |               |               |               |                                                                                                                                                                                                                                                                                                                                                     |                               |               |               |               |              |             |             |                 |            |               |               |               |                                                                                                                                                                                                                                                                                                                                                   |                               |             |               |               |              |             |             |                 |            |             |               |               |                                                                                                                                                                                                                                                                                                                                                   |                               |             |               |               |              |             |             |                 |            |             |               |               |
| PDAC (96)                                                                                                                                                                                                                                                                                                                                         | 8<br>(9.0%)                   | 11<br>(12.5%)   | 10<br>(11.3%)   |               |              |             |                 |                 |            |               |               |               |                                                                                                                                                                                                                                                                                                                                                   |                               |               |               |               |              |             |             |                |            |               |               |                |                                                                                                                                                                                                                                                                                                                                                      |                               |               |               |               |              |             |             |                 |            |               |               |               |                                                                                                                                                                                                                                                                                                                                                     |                               |               |               |               |              |             |             |                 |            |               |               |               |                                                                                                                                                                                                                                                                                                                                                   |                               |             |               |               |              |             |             |                 |            |             |               |               |                                                                                                                                                                                                                                                                                                                                                   |                               |             |               |               |              |             |             |                 |            |             |               |               |
| Gold standard<br>NonPDAC (87)                                                                                                                                                                                                                                                                                                                     | 8<br>(9.2%)                   | 16<br>(18.3%)   | 11<br>(12.5%)   |               |              |             |                 |                 |            |               |               |               |                                                                                                                                                                                                                                                                                                                                                   |                               |               |               |               |              |             |             |                |            |               |               |                |                                                                                                                                                                                                                                                                                                                                                      |                               |               |               |               |              |             |             |                 |            |               |               |               |                                                                                                                                                                                                                                                                                                                                                     |                               |               |               |               |              |             |             |                 |            |               |               |               |                                                                                                                                                                                                                                                                                                                                                   |                               |             |               |               |              |             |             |                 |            |             |               |               |                                                                                                                                                                                                                                                                                                                                                   |                               |             |               |               |              |             |             |                 |            |             |               |               |
| Normal (116)                                                                                                                                                                                                                                                                                                                                      | 0<br>(0.0%)                   | 4<br>(3.4%)     | 112<br>(96.6%)  |               |              |             |                 |                 |            |               |               |               |                                                                                                                                                                                                                                                                                                                                                   |                               |               |               |               |              |             |             |                |            |               |               |                |                                                                                                                                                                                                                                                                                                                                                      |                               |               |               |               |              |             |             |                 |            |               |               |               |                                                                                                                                                                                                                                                                                                                                                     |                               |               |               |               |              |             |             |                 |            |               |               |               |                                                                                                                                                                                                                                                                                                                                                   |                               |             |               |               |              |             |             |                 |            |             |               |               |                                                                                                                                                                                                                                                                                                                                                   |                               |             |               |               |              |             |             |                 |            |             |               |               |
| PDAC (85)                                                                                                                                                                                                                                                                                                                                         | 8<br>(9.0%)                   | 16<br>(18.3%)   | 11<br>(12.5%)   |               |              |             |                 |                 |            |               |               |               |                                                                                                                                                                                                                                                                                                                                                   |                               |               |               |               |              |             |             |                |            |               |               |                |                                                                                                                                                                                                                                                                                                                                                      |                               |               |               |               |              |             |             |                 |            |               |               |               |                                                                                                                                                                                                                                                                                                                                                     |                               |               |               |               |              |             |             |                 |            |               |               |               |                                                                                                                                                                                                                                                                                                                                                   |                               |             |               |               |              |             |             |                 |            |             |               |               |                                                                                                                                                                                                                                                                                                                                                   |                               |             |               |               |              |             |             |                 |            |             |               |               |
| Gold standard<br>NonPDAC (87)                                                                                                                                                                                                                                                                                                                     | 9<br>(10.3%)                  | 13<br>(15.0%)   | 15<br>(17.2%)   |               |              |             |                 |                 |            |               |               |               |                                                                                                                                                                                                                                                                                                                                                   |                               |               |               |               |              |             |             |                |            |               |               |                |                                                                                                                                                                                                                                                                                                                                                      |                               |               |               |               |              |             |             |                 |            |               |               |               |                                                                                                                                                                                                                                                                                                                                                     |                               |               |               |               |              |             |             |                 |            |               |               |               |                                                                                                                                                                                                                                                                                                                                                   |                               |             |               |               |              |             |             |                 |            |             |               |               |                                                                                                                                                                                                                                                                                                                                                   |                               |             |               |               |              |             |             |                 |            |             |               |               |
| Normal (116)                                                                                                                                                                                                                                                                                                                                      | 0<br>(0.0%)                   | 0<br>(0.0%)     | 116<br>(100.0%) |               |              |             |                 |                 |            |               |               |               |                                                                                                                                                                                                                                                                                                                                                   |                               |               |               |               |              |             |             |                |            |               |               |                |                                                                                                                                                                                                                                                                                                                                                      |                               |               |               |               |              |             |             |                 |            |               |               |               |                                                                                                                                                                                                                                                                                                                                                     |                               |               |               |               |              |             |             |                 |            |               |               |               |                                                                                                                                                                                                                                                                                                                                                   |                               |             |               |               |              |             |             |                 |            |             |               |               |                                                                                                                                                                                                                                                                                                                                                   |                               |             |               |               |              |             |             |                 |            |             |               |               |
| PDAC (106)                                                                                                                                                                                                                                                                                                                                        | 9<br>(10.3%)                  | 13<br>(15.0%)   | 15<br>(17.2%)   |               |              |             |                 |                 |            |               |               |               |                                                                                                                                                                                                                                                                                                                                                   |                               |               |               |               |              |             |             |                |            |               |               |                |                                                                                                                                                                                                                                                                                                                                                      |                               |               |               |               |              |             |             |                 |            |               |               |               |                                                                                                                                                                                                                                                                                                                                                     |                               |               |               |               |              |             |             |                 |            |               |               |               |                                                                                                                                                                                                                                                                                                                                                   |                               |             |               |               |              |             |             |                 |            |             |               |               |                                                                                                                                                                                                                                                                                                                                                   |                               |             |               |               |              |             |             |                 |            |             |               |               |
| Gold standard<br>NonPDAC (87)                                                                                                                                                                                                                                                                                                                     | 8<br>(9.2%)                   | 9<br>(10.3%)    | 10<br>(11.5%)   |               |              |             |                 |                 |            |               |               |               |                                                                                                                                                                                                                                                                                                                                                   |                               |               |               |               |              |             |             |                |            |               |               |                |                                                                                                                                                                                                                                                                                                                                                      |                               |               |               |               |              |             |             |                 |            |               |               |               |                                                                                                                                                                                                                                                                                                                                                     |                               |               |               |               |              |             |             |                 |            |               |               |               |                                                                                                                                                                                                                                                                                                                                                   |                               |             |               |               |              |             |             |                 |            |             |               |               |                                                                                                                                                                                                                                                                                                                                                   |                               |             |               |               |              |             |             |                 |            |             |               |               |
| Normal (116)                                                                                                                                                                                                                                                                                                                                      | 0<br>(0.0%)                   | 0<br>(0.0%)     | 116<br>(100.0%) |               |              |             |                 |                 |            |               |               |               |                                                                                                                                                                                                                                                                                                                                                   |                               |               |               |               |              |             |             |                |            |               |               |                |                                                                                                                                                                                                                                                                                                                                                      |                               |               |               |               |              |             |             |                 |            |               |               |               |                                                                                                                                                                                                                                                                                                                                                     |                               |               |               |               |              |             |             |                 |            |               |               |               |                                                                                                                                                                                                                                                                                                                                                   |                               |             |               |               |              |             |             |                 |            |             |               |               |                                                                                                                                                                                                                                                                                                                                                   |                               |             |               |               |              |             |             |                 |            |             |               |               |
| PDAC (89)                                                                                                                                                                                                                                                                                                                                         | 8<br>(9.0%)                   | 9<br>(10.3%)    | 10<br>(11.5%)   |               |              |             |                 |                 |            |               |               |               |                                                                                                                                                                                                                                                                                                                                                   |                               |               |               |               |              |             |             |                |            |               |               |                |                                                                                                                                                                                                                                                                                                                                                      |                               |               |               |               |              |             |             |                 |            |               |               |               |                                                                                                                                                                                                                                                                                                                                                     |                               |               |               |               |              |             |             |                 |            |               |               |               |                                                                                                                                                                                                                                                                                                                                                   |                               |             |               |               |              |             |             |                 |            |             |               |               |                                                                                                                                                                                                                                                                                                                                                   |                               |             |               |               |              |             |             |                 |            |             |               |               |
| Gold standard<br>NonPDAC (87)                                                                                                                                                                                                                                                                                                                     | 8<br>(9.2%)                   | 9<br>(10.3%)    | 10<br>(11.5%)   |               |              |             |                 |                 |            |               |               |               |                                                                                                                                                                                                                                                                                                                                                   |                               |               |               |               |              |             |             |                |            |               |               |                |                                                                                                                                                                                                                                                                                                                                                      |                               |               |               |               |              |             |             |                 |            |               |               |               |                                                                                                                                                                                                                                                                                                                                                     |                               |               |               |               |              |             |             |                 |            |               |               |               |                                                                                                                                                                                                                                                                                                                                                   |                               |             |               |               |              |             |             |                 |            |             |               |               |                                                                                                                                                                                                                                                                                                                                                   |                               |             |               |               |              |             |             |                 |            |             |               |               |
| Normal (116)                                                                                                                                                                                                                                                                                                                                      | 0<br>(0.0%)                   | 0<br>(0.0%)     | 116<br>(100.0%) |               |              |             |                 |                 |            |               |               |               |                                                                                                                                                                                                                                                                                                                                                   |                               |               |               |               |              |             |             |                |            |               |               |                |                                                                                                                                                                                                                                                                                                                                                      |                               |               |               |               |              |             |             |                 |            |               |               |               |                                                                                                                                                                                                                                                                                                                                                     |                               |               |               |               |              |             |             |                 |            |               |               |               |                                                                                                                                                                                                                                                                                                                                                   |                               |             |               |               |              |             |             |                 |            |             |               |               |                                                                                                                                                                                                                                                                                                                                                   |                               |             |               |               |              |             |             |                 |            |             |               |               |
| PDAC (89)                                                                                                                                                                                                                                                                                                                                         | 8<br>(9.0%)                   | 9<br>(10.3%)    | 10<br>(11.5%)   |               |              |             |                 |                 |            |               |               |               |                                                                                                                                                                                                                                                                                                                                                   |                               |               |               |               |              |             |             |                |            |               |               |                |                                                                                                                                                                                                                                                                                                                                                      |                               |               |               |               |              |             |             |                 |            |               |               |               |                                                                                                                                                                                                                                                                                                                                                     |                               |               |               |               |              |             |             |                 |            |               |               |               |                                                                                                                                                                                                                                                                                                                                                   |                               |             |               |               |              |             |             |                 |            |             |               |               |                                                                                                                                                                                                                                                                                                                                                   |                               |             |               |               |              |             |             |                 |            |             |               |               |
| <table border="1"> <tr><td>Gold standard<br/>NonPDAC (97)</td><td>5<br/>(5.2%)</td><td>49<br/>(50.6%)</td><td>13<br/>(13.4%)</td></tr> <tr><td>Normal (116)</td><td>0<br/>(0.0%)</td><td>1<br/>(0.9%)</td><td>115<br/>(99.1%)</td></tr> <tr><td>PDAC (94)</td><td>5<br/>(5.7%)</td><td>49<br/>(55.1%)</td><td>13<br/>(14.8%)</td></tr> </table>   | Gold standard<br>NonPDAC (97) | 5<br>(5.2%)     | 49<br>(50.6%)   | 13<br>(13.4%) | Normal (116) | 0<br>(0.0%) | 1<br>(0.9%)     | 115<br>(99.1%)  | PDAC (94)  | 5<br>(5.7%)   | 49<br>(55.1%) | 13<br>(14.8%) | <table border="1"> <tr><td>Gold standard<br/>NonPDAC (97)</td><td>11<br/>(11.3%)</td><td>47<br/>(48.4%)</td><td>9<br/>(9.3%)</td></tr> <tr><td>Normal (116)</td><td>2<br/>(1.7%)</td><td>0<br/>(0.0%)</td><td>114<br/>(98.3%)</td></tr> <tr><td>PDAC (89)</td><td>11<br/>(12.5%)</td><td>47<br/>(53.0%)</td><td>9<br/>(10.0%)</td></tr> </table>  | Gold standard<br>NonPDAC (97) | 11<br>(11.3%) | 47<br>(48.4%) | 9<br>(9.3%)   | Normal (116) | 2<br>(1.7%) | 0<br>(0.0%) | 114<br>(98.3%) | PDAC (89)  | 11<br>(12.5%) | 47<br>(53.0%) | 9<br>(10.0%)   | <table border="1"> <tr><td>Gold standard<br/>NonPDAC (87)</td><td>14<br/>(16.1%)</td><td>38<br/>(43.7%)</td><td>15<br/>(17.2%)</td></tr> <tr><td>Normal (116)</td><td>2<br/>(1.7%)</td><td>1<br/>(0.9%)</td><td>113<br/>(97.4%)</td></tr> <tr><td>PDAC (106)</td><td>14<br/>(15.9%)</td><td>38<br/>(43.0%)</td><td>15<br/>(17.2%)</td></tr> </table> | Gold standard<br>NonPDAC (87) | 14<br>(16.1%) | 38<br>(43.7%) | 15<br>(17.2%) | Normal (116) | 2<br>(1.7%) | 1<br>(0.9%) | 113<br>(97.4%)  | PDAC (106) | 14<br>(15.9%) | 38<br>(43.0%) | 15<br>(17.2%) | <table border="1"> <tr><td>Gold standard<br/>NonPDAC (87)</td><td>9<br/>(10.3%)</td><td>13<br/>(15.0%)</td><td>15<br/>(17.2%)</td></tr> <tr><td>Normal (116)</td><td>0<br/>(0.0%)</td><td>0<br/>(0.0%)</td><td>116<br/>(100.0%)</td></tr> <tr><td>PDAC (106)</td><td>9<br/>(10.3%)</td><td>13<br/>(15.0%)</td><td>15<br/>(17.2%)</td></tr> </table> | Gold standard<br>NonPDAC (87) | 9<br>(10.3%)  | 13<br>(15.0%) | 15<br>(17.2%) | Normal (116) | 0<br>(0.0%) | 0<br>(0.0%) | 116<br>(100.0%) | PDAC (106) | 9<br>(10.3%)  | 13<br>(15.0%) | 15<br>(17.2%) | <table border="1"> <tr><td>Gold standard<br/>NonPDAC (87)</td><td>8<br/>(9.2%)</td><td>9<br/>(10.3%)</td><td>10<br/>(11.5%)</td></tr> <tr><td>Normal (116)</td><td>0<br/>(0.0%)</td><td>0<br/>(0.0%)</td><td>116<br/>(100.0%)</td></tr> <tr><td>PDAC (89)</td><td>8<br/>(9.0%)</td><td>9<br/>(10.3%)</td><td>10<br/>(11.5%)</td></tr> </table>    | Gold standard<br>NonPDAC (87) | 8<br>(9.2%) | 9<br>(10.3%)  | 10<br>(11.5%) | Normal (116) | 0<br>(0.0%) | 0<br>(0.0%) | 116<br>(100.0%) | PDAC (89)  | 8<br>(9.0%) | 9<br>(10.3%)  | 10<br>(11.5%) | <table border="1"> <tr><td>Gold standard<br/>NonPDAC (87)</td><td>8<br/>(9.2%)</td><td>9<br/>(10.3%)</td><td>10<br/>(11.5%)</td></tr> <tr><td>Normal (116)</td><td>0<br/>(0.0%)</td><td>0<br/>(0.0%)</td><td>116<br/>(100.0%)</td></tr> <tr><td>PDAC (89)</td><td>8<br/>(9.0%)</td><td>9<br/>(10.3%)</td><td>10<br/>(11.5%)</td></tr> </table>    | Gold standard<br>NonPDAC (87) | 8<br>(9.2%) | 9<br>(10.3%)  | 10<br>(11.5%) | Normal (116) | 0<br>(0.0%) | 0<br>(0.0%) | 116<br>(100.0%) | PDAC (89)  | 8<br>(9.0%) | 9<br>(10.3%)  | 10<br>(11.5%) |
| Gold standard<br>NonPDAC (97)                                                                                                                                                                                                                                                                                                                     | 5<br>(5.2%)                   | 49<br>(50.6%)   | 13<br>(13.4%)   |               |              |             |                 |                 |            |               |               |               |                                                                                                                                                                                                                                                                                                                                                   |                               |               |               |               |              |             |             |                |            |               |               |                |                                                                                                                                                                                                                                                                                                                                                      |                               |               |               |               |              |             |             |                 |            |               |               |               |                                                                                                                                                                                                                                                                                                                                                     |                               |               |               |               |              |             |             |                 |            |               |               |               |                                                                                                                                                                                                                                                                                                                                                   |                               |             |               |               |              |             |             |                 |            |             |               |               |                                                                                                                                                                                                                                                                                                                                                   |                               |             |               |               |              |             |             |                 |            |             |               |               |
| Normal (116)                                                                                                                                                                                                                                                                                                                                      | 0<br>(0.0%)                   | 1<br>(0.9%)     | 115<br>(99.1%)  |               |              |             |                 |                 |            |               |               |               |                                                                                                                                                                                                                                                                                                                                                   |                               |               |               |               |              |             |             |                |            |               |               |                |                                                                                                                                                                                                                                                                                                                                                      |                               |               |               |               |              |             |             |                 |            |               |               |               |                                                                                                                                                                                                                                                                                                                                                     |                               |               |               |               |              |             |             |                 |            |               |               |               |                                                                                                                                                                                                                                                                                                                                                   |                               |             |               |               |              |             |             |                 |            |             |               |               |                                                                                                                                                                                                                                                                                                                                                   |                               |             |               |               |              |             |             |                 |            |             |               |               |
| PDAC (94)                                                                                                                                                                                                                                                                                                                                         | 5<br>(5.7%)                   | 49<br>(55.1%)   | 13<br>(14.8%)   |               |              |             |                 |                 |            |               |               |               |                                                                                                                                                                                                                                                                                                                                                   |                               |               |               |               |              |             |             |                |            |               |               |                |                                                                                                                                                                                                                                                                                                                                                      |                               |               |               |               |              |             |             |                 |            |               |               |               |                                                                                                                                                                                                                                                                                                                                                     |                               |               |               |               |              |             |             |                 |            |               |               |               |                                                                                                                                                                                                                                                                                                                                                   |                               |             |               |               |              |             |             |                 |            |             |               |               |                                                                                                                                                                                                                                                                                                                                                   |                               |             |               |               |              |             |             |                 |            |             |               |               |
| Gold standard<br>NonPDAC (97)                                                                                                                                                                                                                                                                                                                     | 11<br>(11.3%)                 | 47<br>(48.4%)   | 9<br>(9.3%)     |               |              |             |                 |                 |            |               |               |               |                                                                                                                                                                                                                                                                                                                                                   |                               |               |               |               |              |             |             |                |            |               |               |                |                                                                                                                                                                                                                                                                                                                                                      |                               |               |               |               |              |             |             |                 |            |               |               |               |                                                                                                                                                                                                                                                                                                                                                     |                               |               |               |               |              |             |             |                 |            |               |               |               |                                                                                                                                                                                                                                                                                                                                                   |                               |             |               |               |              |             |             |                 |            |             |               |               |                                                                                                                                                                                                                                                                                                                                                   |                               |             |               |               |              |             |             |                 |            |             |               |               |
| Normal (116)                                                                                                                                                                                                                                                                                                                                      | 2<br>(1.7%)                   | 0<br>(0.0%)     | 114<br>(98.3%)  |               |              |             |                 |                 |            |               |               |               |                                                                                                                                                                                                                                                                                                                                                   |                               |               |               |               |              |             |             |                |            |               |               |                |                                                                                                                                                                                                                                                                                                                                                      |                               |               |               |               |              |             |             |                 |            |               |               |               |                                                                                                                                                                                                                                                                                                                                                     |                               |               |               |               |              |             |             |                 |            |               |               |               |                                                                                                                                                                                                                                                                                                                                                   |                               |             |               |               |              |             |             |                 |            |             |               |               |                                                                                                                                                                                                                                                                                                                                                   |                               |             |               |               |              |             |             |                 |            |             |               |               |
| PDAC (89)                                                                                                                                                                                                                                                                                                                                         | 11<br>(12.5%)                 | 47<br>(53.0%)   | 9<br>(10.0%)    |               |              |             |                 |                 |            |               |               |               |                                                                                                                                                                                                                                                                                                                                                   |                               |               |               |               |              |             |             |                |            |               |               |                |                                                                                                                                                                                                                                                                                                                                                      |                               |               |               |               |              |             |             |                 |            |               |               |               |                                                                                                                                                                                                                                                                                                                                                     |                               |               |               |               |              |             |             |                 |            |               |               |               |                                                                                                                                                                                                                                                                                                                                                   |                               |             |               |               |              |             |             |                 |            |             |               |               |                                                                                                                                                                                                                                                                                                                                                   |                               |             |               |               |              |             |             |                 |            |             |               |               |
| Gold standard<br>NonPDAC (87)                                                                                                                                                                                                                                                                                                                     | 14<br>(16.1%)                 | 38<br>(43.7%)   | 15<br>(17.2%)   |               |              |             |                 |                 |            |               |               |               |                                                                                                                                                                                                                                                                                                                                                   |                               |               |               |               |              |             |             |                |            |               |               |                |                                                                                                                                                                                                                                                                                                                                                      |                               |               |               |               |              |             |             |                 |            |               |               |               |                                                                                                                                                                                                                                                                                                                                                     |                               |               |               |               |              |             |             |                 |            |               |               |               |                                                                                                                                                                                                                                                                                                                                                   |                               |             |               |               |              |             |             |                 |            |             |               |               |                                                                                                                                                                                                                                                                                                                                                   |                               |             |               |               |              |             |             |                 |            |             |               |               |
| Normal (116)                                                                                                                                                                                                                                                                                                                                      | 2<br>(1.7%)                   | 1<br>(0.9%)     | 113<br>(97.4%)  |               |              |             |                 |                 |            |               |               |               |                                                                                                                                                                                                                                                                                                                                                   |                               |               |               |               |              |             |             |                |            |               |               |                |                                                                                                                                                                                                                                                                                                                                                      |                               |               |               |               |              |             |             |                 |            |               |               |               |                                                                                                                                                                                                                                                                                                                                                     |                               |               |               |               |              |             |             |                 |            |               |               |               |                                                                                                                                                                                                                                                                                                                                                   |                               |             |               |               |              |             |             |                 |            |             |               |               |                                                                                                                                                                                                                                                                                                                                                   |                               |             |               |               |              |             |             |                 |            |             |               |               |
| PDAC (106)                                                                                                                                                                                                                                                                                                                                        | 14<br>(15.9%)                 | 38<br>(43.0%)   | 15<br>(17.2%)   |               |              |             |                 |                 |            |               |               |               |                                                                                                                                                                                                                                                                                                                                                   |                               |               |               |               |              |             |             |                |            |               |               |                |                                                                                                                                                                                                                                                                                                                                                      |                               |               |               |               |              |             |             |                 |            |               |               |               |                                                                                                                                                                                                                                                                                                                                                     |                               |               |               |               |              |             |             |                 |            |               |               |               |                                                                                                                                                                                                                                                                                                                                                   |                               |             |               |               |              |             |             |                 |            |             |               |               |                                                                                                                                                                                                                                                                                                                                                   |                               |             |               |               |              |             |             |                 |            |             |               |               |
| Gold standard<br>NonPDAC (87)                                                                                                                                                                                                                                                                                                                     | 9<br>(10.3%)                  | 13<br>(15.0%)   | 15<br>(17.2%)   |               |              |             |                 |                 |            |               |               |               |                                                                                                                                                                                                                                                                                                                                                   |                               |               |               |               |              |             |             |                |            |               |               |                |                                                                                                                                                                                                                                                                                                                                                      |                               |               |               |               |              |             |             |                 |            |               |               |               |                                                                                                                                                                                                                                                                                                                                                     |                               |               |               |               |              |             |             |                 |            |               |               |               |                                                                                                                                                                                                                                                                                                                                                   |                               |             |               |               |              |             |             |                 |            |             |               |               |                                                                                                                                                                                                                                                                                                                                                   |                               |             |               |               |              |             |             |                 |            |             |               |               |
| Normal (116)                                                                                                                                                                                                                                                                                                                                      | 0<br>(0.0%)                   | 0<br>(0.0%)     | 116<br>(100.0%) |               |              |             |                 |                 |            |               |               |               |                                                                                                                                                                                                                                                                                                                                                   |                               |               |               |               |              |             |             |                |            |               |               |                |                                                                                                                                                                                                                                                                                                                                                      |                               |               |               |               |              |             |             |                 |            |               |               |               |                                                                                                                                                                                                                                                                                                                                                     |                               |               |               |               |              |             |             |                 |            |               |               |               |                                                                                                                                                                                                                                                                                                                                                   |                               |             |               |               |              |             |             |                 |            |             |               |               |                                                                                                                                                                                                                                                                                                                                                   |                               |             |               |               |              |             |             |                 |            |             |               |               |
| PDAC (106)                                                                                                                                                                                                                                                                                                                                        | 9<br>(10.3%)                  | 13<br>(15.0%)   | 15<br>(17.2%)   |               |              |             |                 |                 |            |               |               |               |                                                                                                                                                                                                                                                                                                                                                   |                               |               |               |               |              |             |             |                |            |               |               |                |                                                                                                                                                                                                                                                                                                                                                      |                               |               |               |               |              |             |             |                 |            |               |               |               |                                                                                                                                                                                                                                                                                                                                                     |                               |               |               |               |              |             |             |                 |            |               |               |               |                                                                                                                                                                                                                                                                                                                                                   |                               |             |               |               |              |             |             |                 |            |             |               |               |                                                                                                                                                                                                                                                                                                                                                   |                               |             |               |               |              |             |             |                 |            |             |               |               |
| Gold standard<br>NonPDAC (87)                                                                                                                                                                                                                                                                                                                     | 8<br>(9.2%)                   | 9<br>(10.3%)    | 10<br>(11.5%)   |               |              |             |                 |                 |            |               |               |               |                                                                                                                                                                                                                                                                                                                                                   |                               |               |               |               |              |             |             |                |            |               |               |                |                                                                                                                                                                                                                                                                                                                                                      |                               |               |               |               |              |             |             |                 |            |               |               |               |                                                                                                                                                                                                                                                                                                                                                     |                               |               |               |               |              |             |             |                 |            |               |               |               |                                                                                                                                                                                                                                                                                                                                                   |                               |             |               |               |              |             |             |                 |            |             |               |               |                                                                                                                                                                                                                                                                                                                                                   |                               |             |               |               |              |             |             |                 |            |             |               |               |
| Normal (116)                                                                                                                                                                                                                                                                                                                                      | 0<br>(0.0%)                   | 0<br>(0.0%)     | 116<br>(100.0%) |               |              |             |                 |                 |            |               |               |               |                                                                                                                                                                                                                                                                                                                                                   |                               |               |               |               |              |             |             |                |            |               |               |                |                                                                                                                                                                                                                                                                                                                                                      |                               |               |               |               |              |             |             |                 |            |               |               |               |                                                                                                                                                                                                                                                                                                                                                     |                               |               |               |               |              |             |             |                 |            |               |               |               |                                                                                                                                                                                                                                                                                                                                                   |                               |             |               |               |              |             |             |                 |            |             |               |               |                                                                                                                                                                                                                                                                                                                                                   |                               |             |               |               |              |             |             |                 |            |             |               |               |
| PDAC (89)                                                                                                                                                                                                                                                                                                                                         | 8<br>(9.0%)                   | 9<br>(10.3%)    | 10<br>(11.5%)   |               |              |             |                 |                 |            |               |               |               |                                                                                                                                                                                                                                                                                                                                                   |                               |               |               |               |              |             |             |                |            |               |               |                |                                                                                                                                                                                                                                                                                                                                                      |                               |               |               |               |              |             |             |                 |            |               |               |               |                                                                                                                                                                                                                                                                                                                                                     |                               |               |               |               |              |             |             |                 |            |               |               |               |                                                                                                                                                                                                                                                                                                                                                   |                               |             |               |               |              |             |             |                 |            |             |               |               |                                                                                                                                                                                                                                                                                                                                                   |                               |             |               |               |              |             |             |                 |            |             |               |               |
| Gold standard<br>NonPDAC (87)                                                                                                                                                                                                                                                                                                                     | 8<br>(9.2%)                   | 9<br>(10.3%)    | 10<br>(11.5%)   |               |              |             |                 |                 |            |               |               |               |                                                                                                                                                                                                                                                                                                                                                   |                               |               |               |               |              |             |             |                |            |               |               |                |                                                                                                                                                                                                                                                                                                                                                      |                               |               |               |               |              |             |             |                 |            |               |               |               |                                                                                                                                                                                                                                                                                                                                                     |                               |               |               |               |              |             |             |                 |            |               |               |               |                                                                                                                                                                                                                                                                                                                                                   |                               |             |               |               |              |             |             |                 |            |             |               |               |                                                                                                                                                                                                                                                                                                                                                   |                               |             |               |               |              |             |             |                 |            |             |               |               |
| Normal (116)                                                                                                                                                                                                                                                                                                                                      | 0<br>(0.0%)                   | 0<br>(0.0%)     | 116<br>(100.0%) |               |              |             |                 |                 |            |               |               |               |                                                                                                                                                                                                                                                                                                                                                   |                               |               |               |               |              |             |             |                |            |               |               |                |                                                                                                                                                                                                                                                                                                                                                      |                               |               |               |               |              |             |             |                 |            |               |               |               |                                                                                                                                                                                                                                                                                                                                                     |                               |               |               |               |              |             |             |                 |            |               |               |               |                                                                                                                                                                                                                                                                                                                                                   |                               |             |               |               |              |             |             |                 |            |             |               |               |                                                                                                                                                                                                                                                                                                                                                   |                               |             |               |               |              |             |             |                 |            |             |               |               |
| PDAC (89)                                                                                                                                                                                                                                                                                                                                         | 8<br>(9.0%)                   | 9<br>(10.3%)    | 10<br>(11.5%)   |               |              |             |                 |                 |            |               |               |               |                                                                                                                                                                                                                                                                                                                                                   |                               |               |               |               |              |             |             |                |            |               |               |                |                                                                                                                                                                                                                                                                                                                                                      |                               |               |               |               |              |             |             |                 |            |               |               |               |                                                                                                                                                                                                                                                                                                                                                     |                               |               |               |               |              |             |             |                 |            |               |               |               |                                                                                                                                                                                                                                                                                                                                                   |                               |             |               |               |              |             |             |                 |            |             |               |               |                                                                                                                                                                                                                                                                                                                                                   |                               |             |               |               |              |             |             |                 |            |             |               |               |

Supplementary Figure 4: Reader study of 33 readers on non-contrast CT with AI assistance for primary diagnosis (normal vs. PDAC vs. nonPDAC).

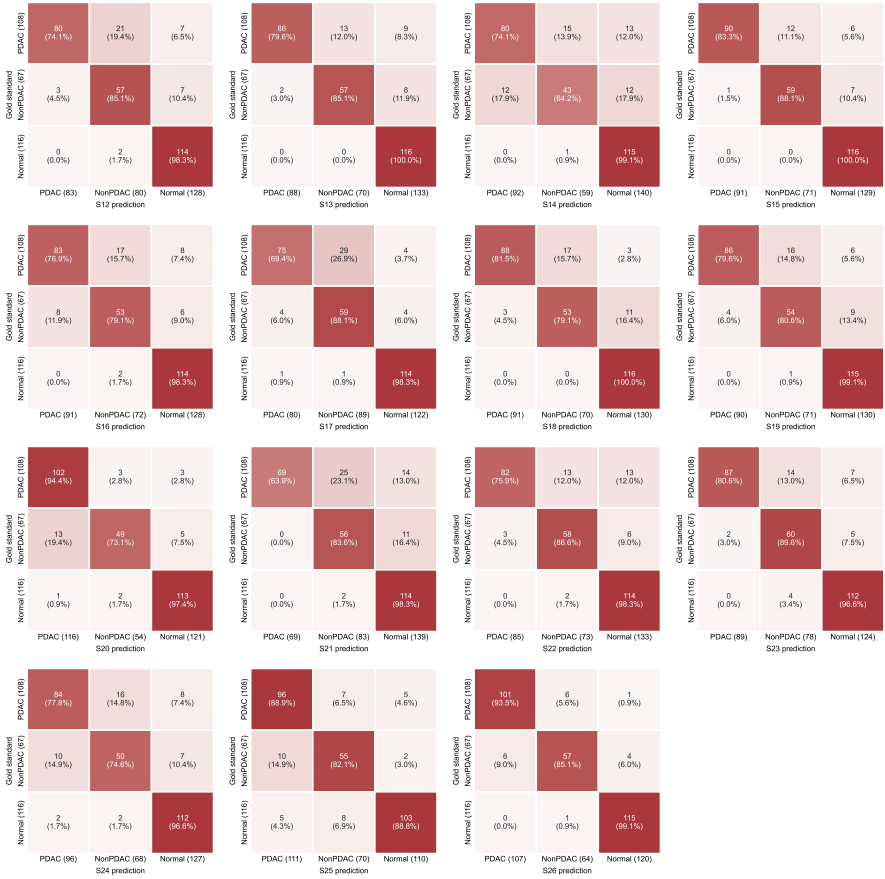

Supplementary Figure 5: Reader study of 15 readers on contrast-enhanced CT for primary diagnosis (normal vs. PDAC vs. nonPDAC).

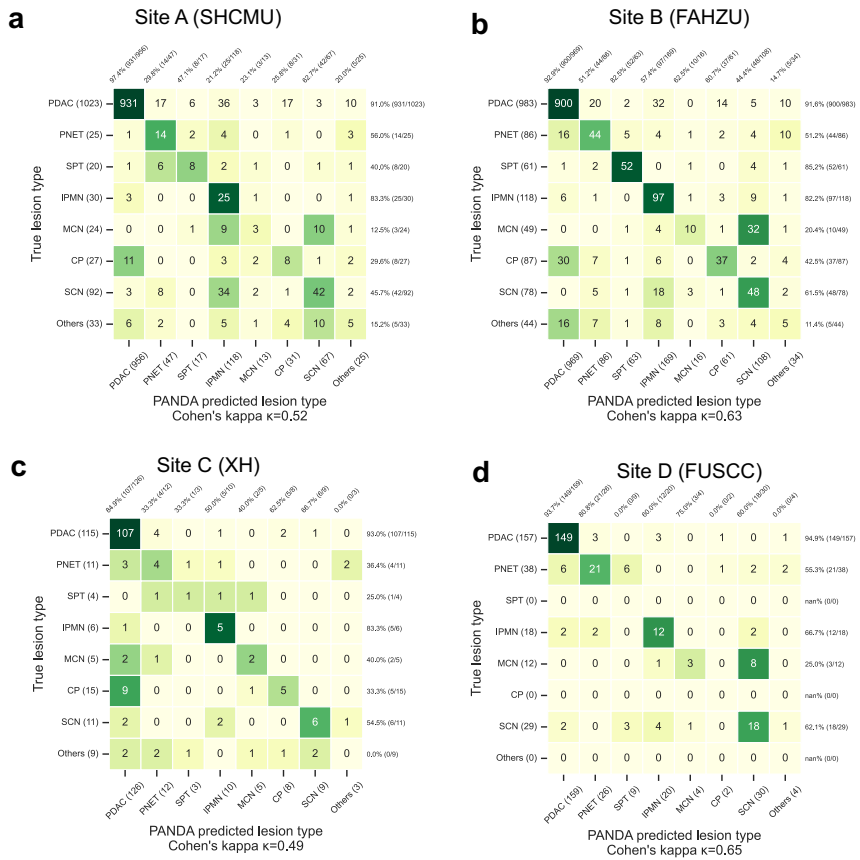

**Supplementary Figure 6:** Differential diagnosis with PANDA on external test cohorts where nonPDAC cases are available: (a)SHCMU (b)FAHZU (c)XH (d)FUSCC. Cohen's kappa statistics are provided.

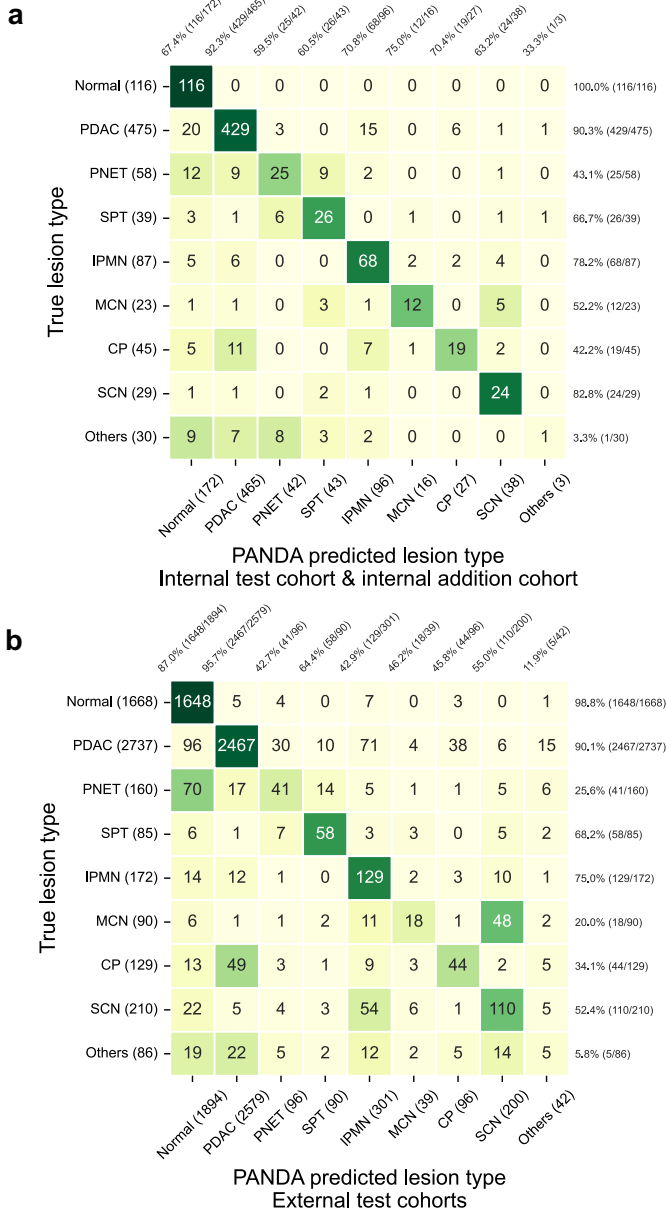

**Supplementary Figure 7:** Confusion matrix of the full pipeline (lesion detection + differential diagnosis) on (a) the internal test cohort and internal addition cohort, and (b) The external test cohorts.

**Examples of PANDA's (peri-)pancreatic disease finding**

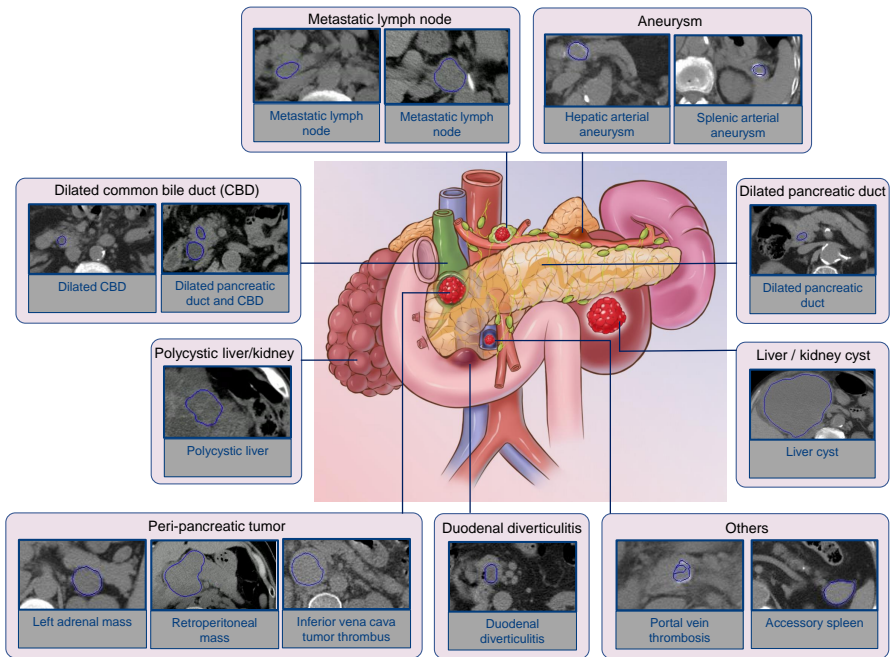

**Supplementary Figure 8:** Examples of PANDA's (peri-)pancreatic disease findings in the real-world clinical evaluation. PANDA identifies all these example cases as nonPDAC (finding/lesion contours marked in blue). These examples help provide a comprehensive understanding of the performance of PANDA in real-world clinical applications – some of its findings may not be true positive pancreatic lesions, but they are not negligible false positives either.

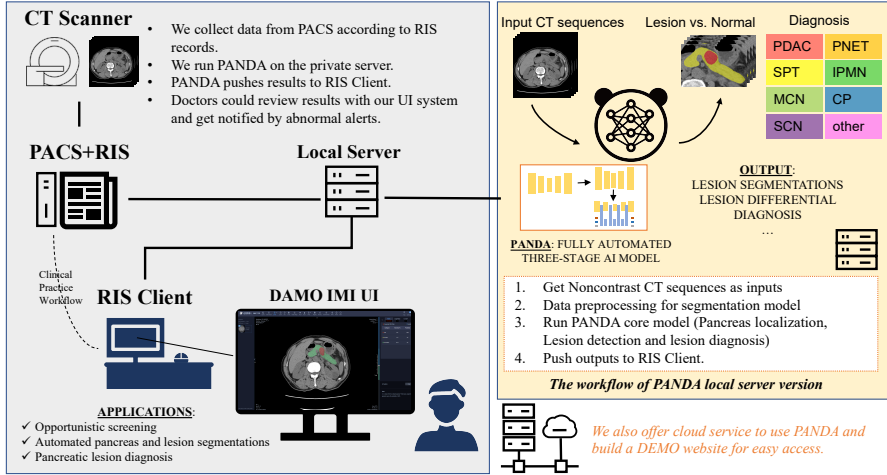

**Supplementary Figure 9:** Flowchart describing the process of the seamless integration of PANDA into the existing clinical infrastructures. We also offer cloud service to use PANDA and build a demo website (<http://panda.medofmind.com/>) for easy access. PACS, picture archiving and communication system; RIS, radiology information system; DAMO IMI UI, our DAMO Intelligent Medical Imaging user interface (IMI UI).

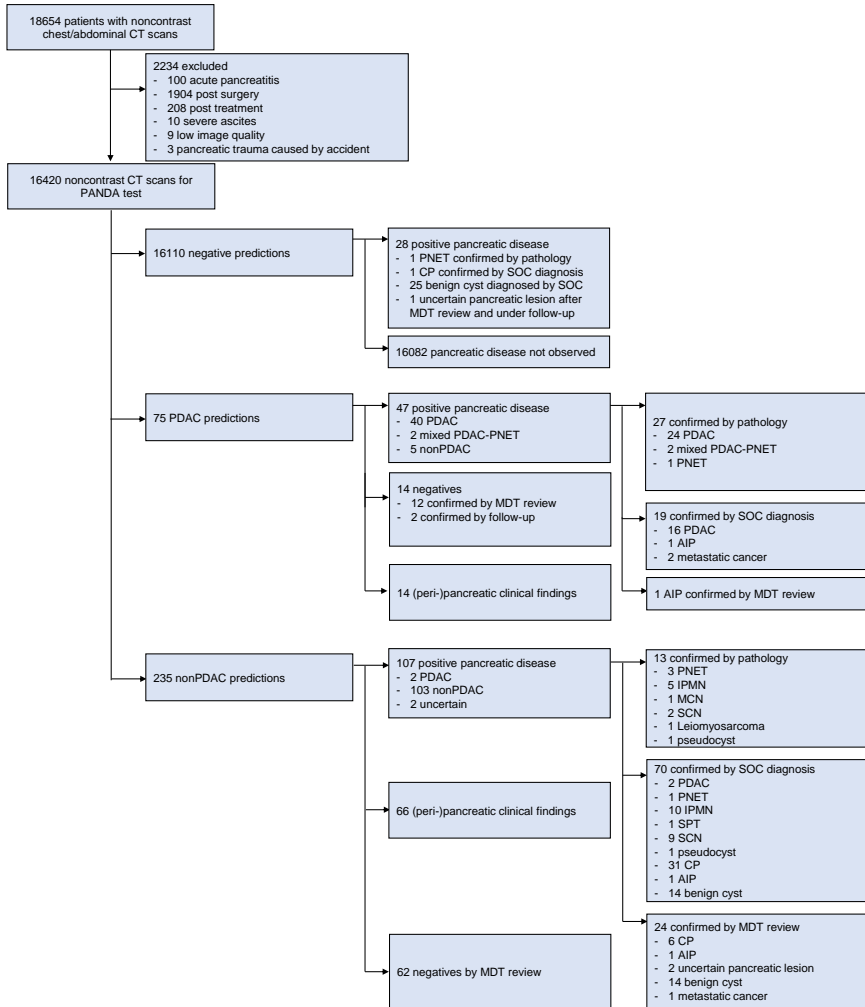

Supplementary Figure 10: Flowchart describing the test process of patients of real-world study 1.



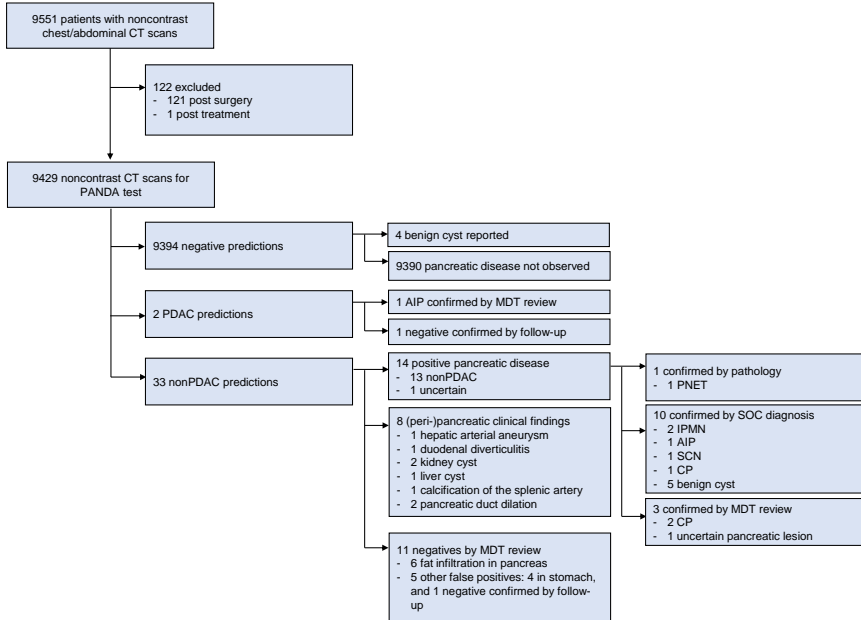

**Supplementary Figure 11:** Flowchart describing the test process of patients from the physical exam centers of real-world study 1.

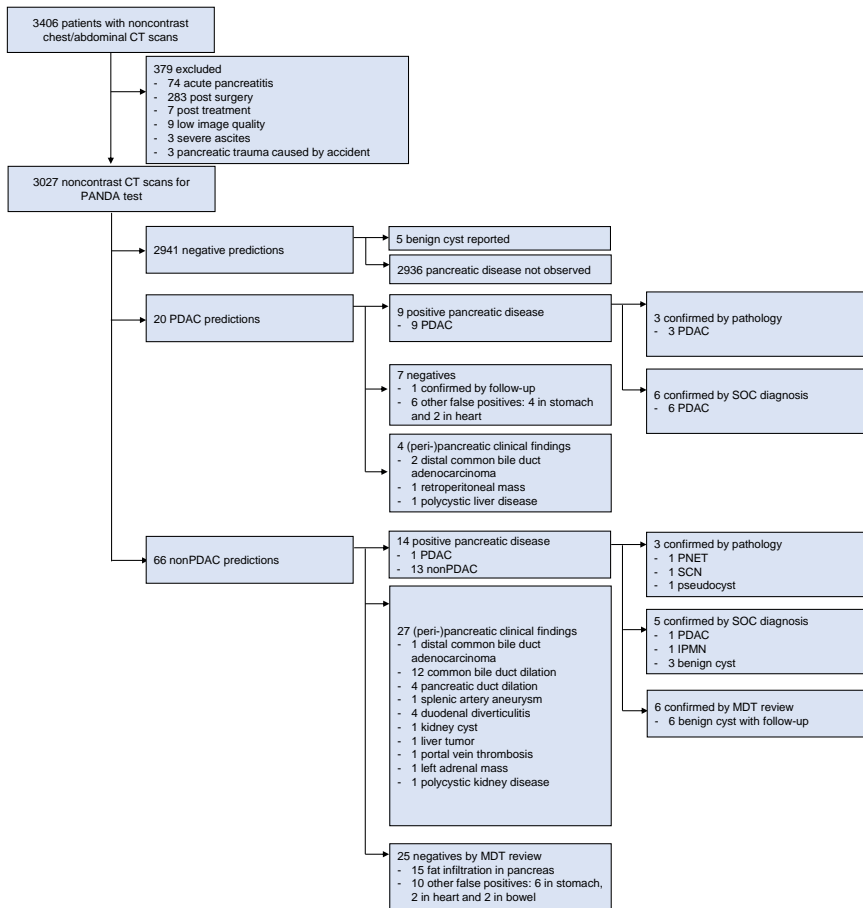

**Supplementary Figure 12:** Flowchart describing the test process of patients from the emergency department of real-world study 1.

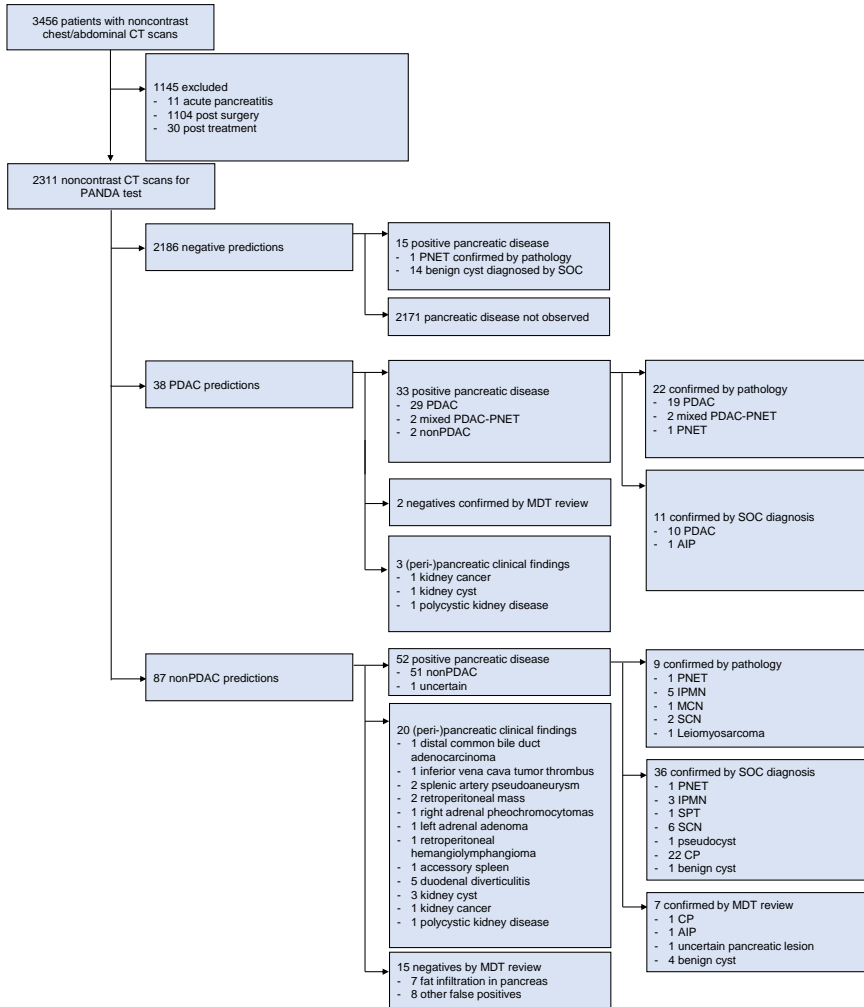

**Supplementary Figure 13:** Flowchart describing the test process of outpatients of real-world study 1.

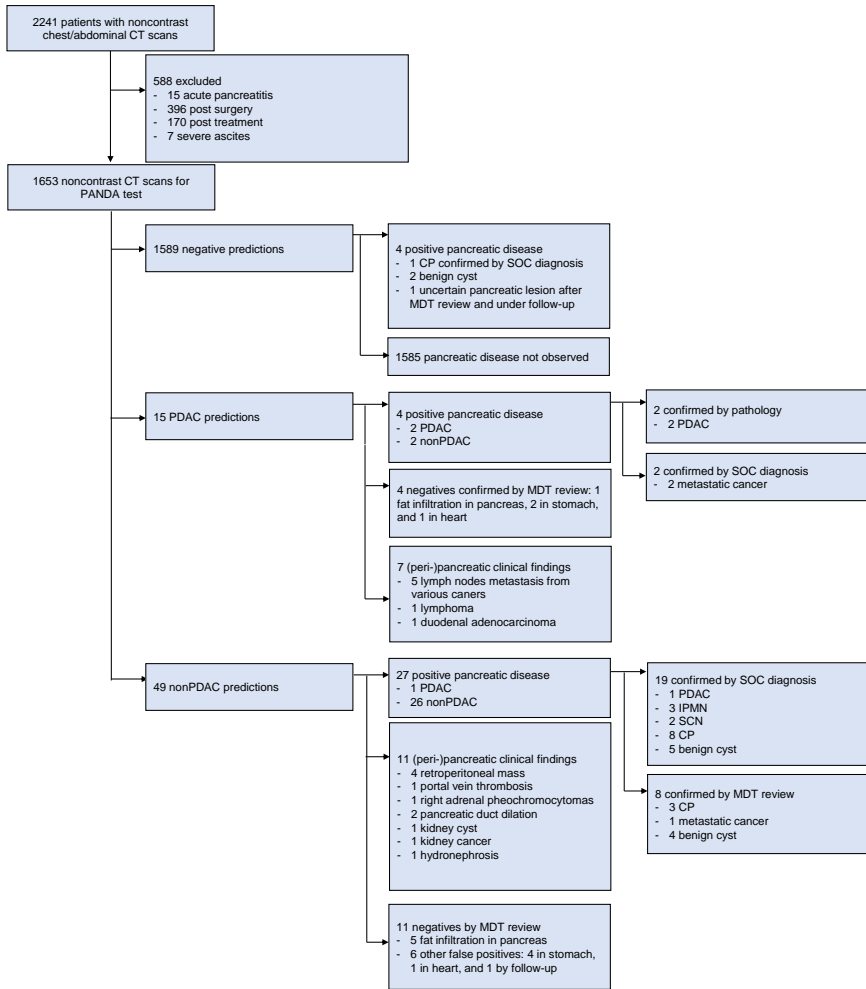

**Supplementary Figure 14:** Flowchart describing the test process of inpatients of real-world study 1.

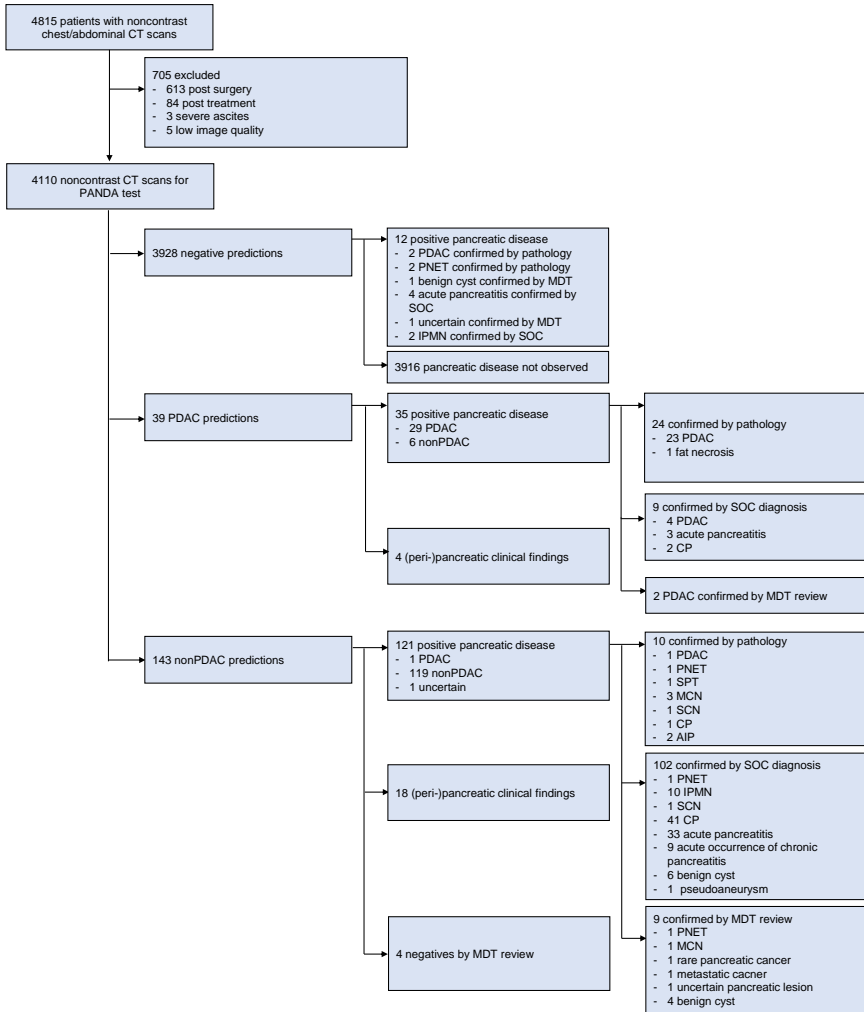

Supplementary Figure 15: Flowchart describing the test process of patients of real-world study 2.

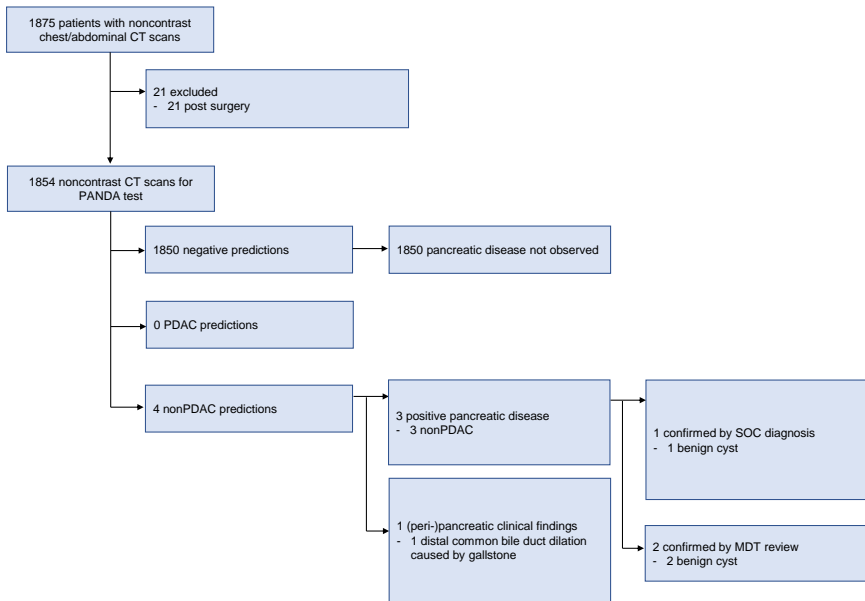

**Supplementary Figure 16:** Flowchart describing the test process of patients from the physical exam centers of real-world study 2.

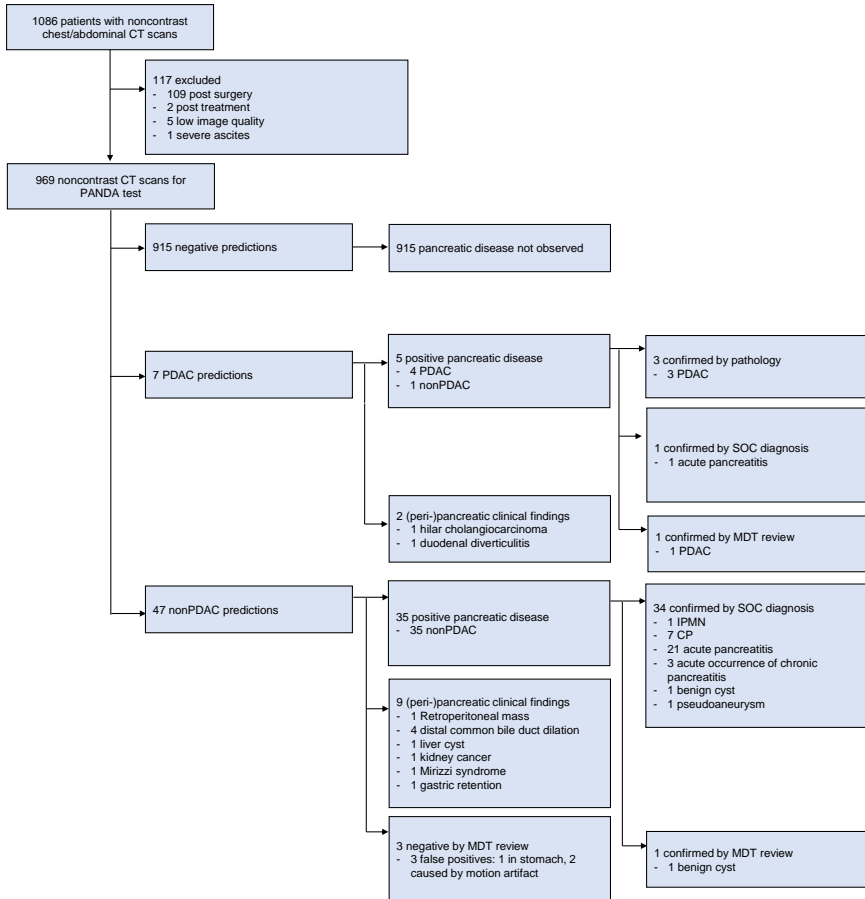

**Supplementary Figure 17:** Flowchart describing the test process of patients from the emergency department of real-world study 2.

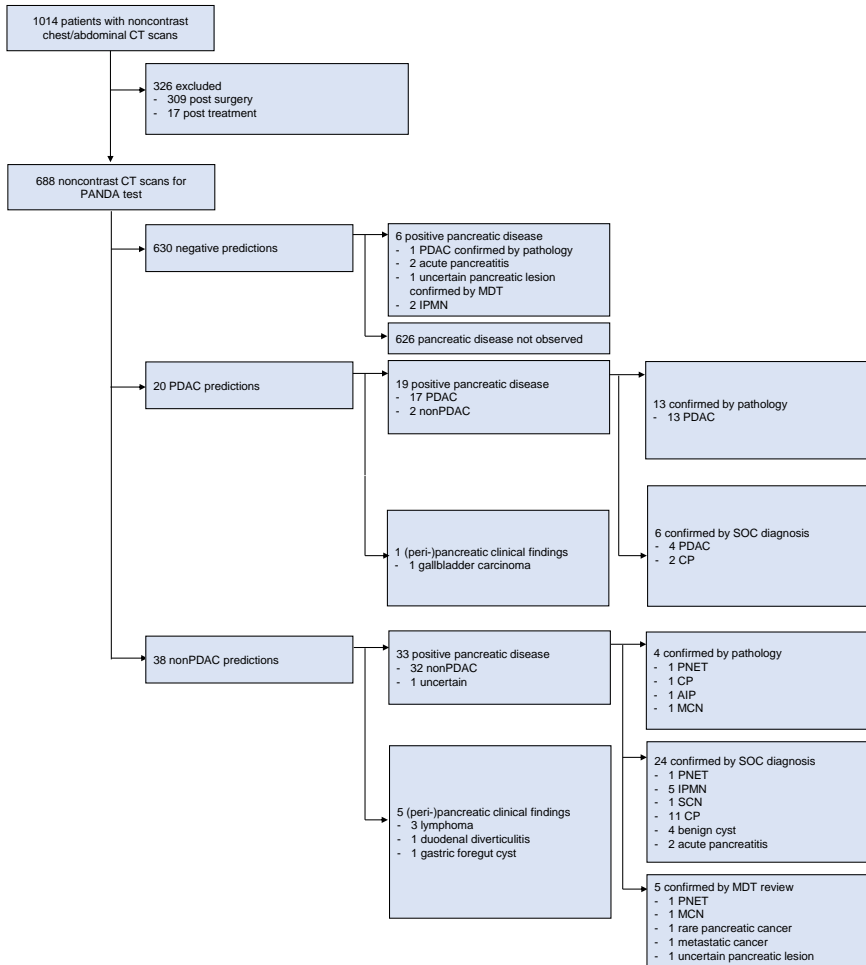

**Supplementary Figure 18:** Flowchart describing the test process of outpatients of real-world study 2.



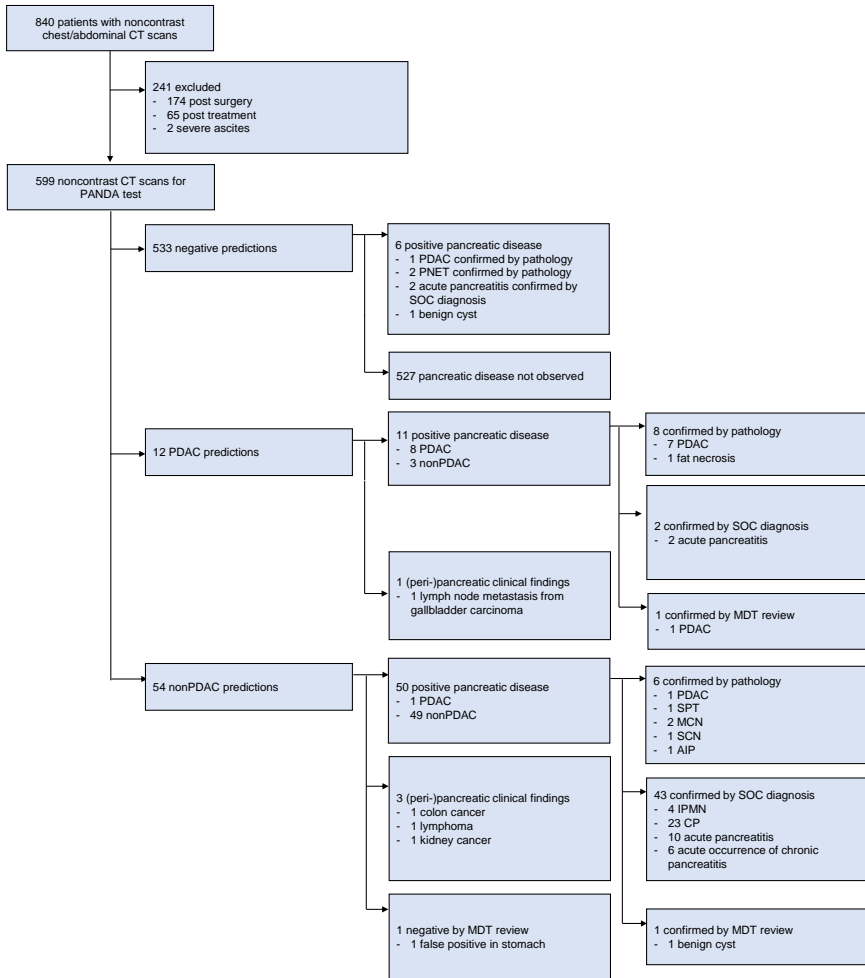

**Supplementary Figure 19:** Flowchart describing the test process of inpatients of real-world study 2.

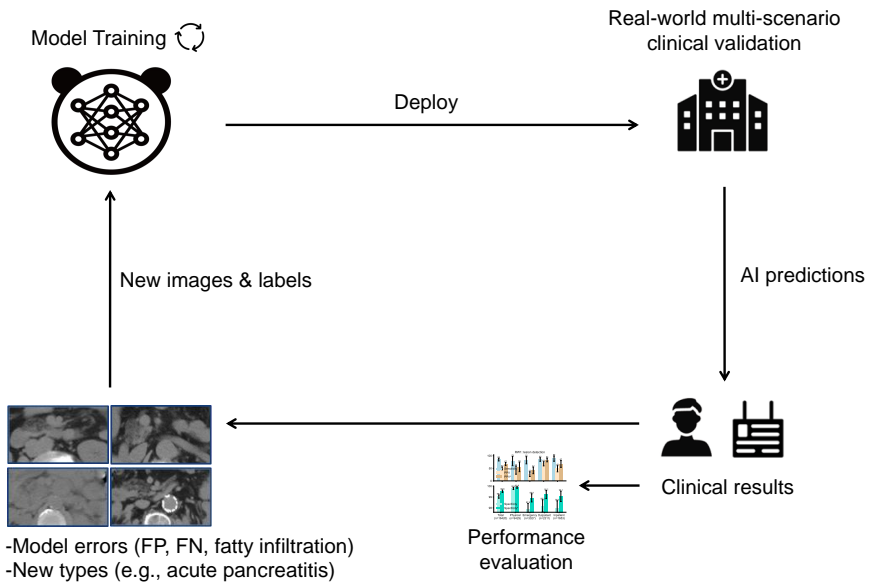

**Supplementary Figure 20:** Model evolution. We deployed PANDA for real-world multi-scenario clinical validation. The AI results were evaluated by the clinical results, e.g. standard-of-care (SOC) clinical decision, or multidisciplinary team (MDT) determination. The erroneous cases and new types were further collected and annotated for model evolution. The upgraded model, PANDA Plus, significantly reduced the false positives by more than 80%, reaching a desired specificity of 99.9% for both pancreatic lesion detection and PDAC identification.

|                       | <b>Lesion types</b>                                  |
|-----------------------|------------------------------------------------------|
| nonPDAC-<br>'other'   | invasive intraductal eosinophilic papillary neoplasm |
|                       | invasive intraductal tubulopapillary neoplasm        |
|                       | lipomatous pseudohypertrophy of the panceas          |
|                       | leiomyosarcoma                                       |
|                       | pancreatic hemangioma                                |
|                       | pancreatic tuberculosis                              |
|                       | pancreatic metastases                                |
|                       | acinar cell carcinoma                                |
|                       | pancreatic liposarcoma                               |
|                       | adenomyomatous hyperplasia                           |
|                       | primary pancreatic lymphoma                          |
|                       | solitary fibrous tumor                               |
|                       | pancreatic schwannoma                                |
|                       | islet hyperplasia                                    |
|                       | perivascular epithelioid cell tumor of the pancreas  |
|                       | gastrointestinal stromal tumor                       |
|                       | intrapancreatic accessory spleen                     |
|                       | pancreatic lipoma                                    |
|                       | pancreatic nodular fat necrosis                      |
|                       | pseudopancreatic cyst                                |
| simple cyst           |                                                      |
| retention cyst        |                                                      |
| lymphoepithelial cyst |                                                      |
| epidermoid cyst       |                                                      |

**Supplementary Table 1:** List of subtypes included in nonPDAC 'other'.

|       | Site B (FAHZU)<br>(sur./bio.) | Site C (XH)<br>(sur./bio.) | RW1 (SIPD)<br>(sur./bio./cli.) | RW2 (SIPD)<br>(sur./bio./cli.) |
|-------|-------------------------------|----------------------------|--------------------------------|--------------------------------|
| PDAC  | 473/510                       | 95/20                      | 9/17/18                        | 7/19/6                         |
| PNET  | 74/12                         | 11/0                       | 4/1/1                          | 3/0/2                          |
| SPT   | 60/1                          | 4/0                        | 0/0/1                          | 1/0/0                          |
| IPMN  | 115/3                         | 6/0                        | 5/0/10                         | 0/0/12                         |
| MCN   | 49/0                          | 5/0                        | 1/0/0                          | 3/0/1                          |
| CP    | 44/43                         | 10/5                       | 0/0/42                         | 2/1/52                         |
| SCN   | 73/5                          | 11/0                       | 2/0/9                          | 1/0/1                          |
| Other | 30/14                         | 9/0                        | 2/0/57                         | 1/0/14                         |
| AP    | -                             | -                          | -                              | 0/0/40                         |

**Supplementary Table 2:** Supplementary data characteristics of reference standard of lesion types, i.e. surgical pathology (denoted by “sur.”), biopsy pathology (denoted by “bio.”), or clinical diagnosis (denoted by “cli.”), stratified by lesion type in Site B, Site C, and the real-world cohorts (RW1 and RW2). The internal training and test cohort, Site A, D, E, F, G, H, and I are either all surgically resected, or only contained PDAC lesions. FAHZU, First Affiliated Hospital of Zhejiang University; XH, Xinhua Hospital; SIPD, Shanghai Institution of Pancreatic Diseases.

|       | Internal Training Cohort<br>(n=2,270) |                     | Internal Test Cohort<br>(including differential<br>diagnosis cohort)<br>(n=786) |                     | External Test Cohorts<br>(n=3,669) |                     |
|-------|---------------------------------------|---------------------|---------------------------------------------------------------------------------|---------------------|------------------------------------|---------------------|
|       | Size(mm)<br>(IQR)                     | Fraction<br><3cm(%) | Size(mm)<br>(IQR)                                                               | Fraction<br><3cm(%) | Size(mm)<br>(IQR)                  | Fraction<br><3cm(%) |
| PDAC  | 30 (23-44)                            | 50                  | 30 (25-42)                                                                      | 43                  | 30 (24-40)                         | 49                  |
| PNET  | 25 (17-36)                            | 60                  | 29 (20-40)                                                                      | 50                  | 20 (14-30)                         | 72                  |
| SPT   | 37 (22-56)                            | 39                  | 38 (25-75)                                                                      | 38                  | 33 (23-52)                         | 40                  |
| IPMN  | 25 (17-35)                            | 64                  | 25 (18-35)                                                                      | 60                  | 22 (15-31)                         | 70                  |
| MCN   | 47 (36-65)                            | 11                  | 42 (30-68)                                                                      | 13                  | 30 (26-42)                         | 41                  |
| CP    | 31 (22-39)                            | 42                  | 26 (17-39)                                                                      | 55                  | 26 (22-34)                         | 63                  |
| SCN   | 28 (21-39)                            | 54                  | 35 (27-41)                                                                      | 31                  | 25 (16-33)                         | 66                  |
| Other | 29 (22-46)                            | 51                  | 25 (20-55)                                                                      | 57                  | 30 (19-42)                         | 50                  |

**Supplementary Table 3:** Supplementary data characteristics of lesion size (diameter) stratified by lesion type in the internal training, internal test, and external multicenter test cohort. Information was collected in pathology or radiology report (if missing in pathology). The information on lesion size was either collected in the original surgical pathology report (if size was recorded) or was measured on the contrast-enhanced CT image.

|                       | <b>PANDA</b> | <b>Report</b> | $\Delta$ (CI)   | <b>p-value</b><br>(difference) | <b>p-value</b><br>(non-inferiority<br>at 5% margin) |
|-----------------------|--------------|---------------|-----------------|--------------------------------|-----------------------------------------------------|
| Accuracy (%)          | 79.6         | 79.8          | -0.2 (-3.2-2.8) | 1.00                           | 0.0018                                              |
| Balanced accuracy (%) | 60.7         | 62.2          | -1.4 (-8.1-4.9) | 0.65                           | 0.28                                                |

**Supplementary Table 4:** Comparison between PANDA (noncontrast CT) and second-reader radiology report (contrast CT) performance on differential diagnosis of eight subtypes of pancreatic diseases in the internal differential diagnosis set ( $n = 786$ ). This report is a secondary analysis of a primary standard of care clinical radiology report, resulting from the double reading process. P values were computed via two-sided permutation tests.

|                  | DSC   | 95% CI      | HD95 (mm) | 95% CI     |
|------------------|-------|-------------|-----------|------------|
| Whole Pancreas   | 0.903 | 0.895-0.910 | 4.37      | 3.65-5.22  |
| Healthy Pancreas | 0.852 | 0.832-0.868 | 4.96      | 4.11-5.98  |
| PDAC             | 0.719 | 0.674-0.758 | 6.45      | 5.23-7.97  |
| PNET             | 0.395 | 0.091-0.698 | 17.83     | 8.24-31.42 |
| SPT              | 0.833 | 0.690-0.925 | 9.03      | 2.87-20.56 |
| IPMN             | 0.755 | 0.666-0.819 | 6.76      | 4.28-10.07 |
| MCN              | 0.940 | 0.923-0.956 | 3.00      | 3.00-3.00  |
| CP               | 0.661 | 0.547-0.764 | 19.93     | 6.16-38.72 |
| SCN              | 0.732 | 0.463-0.924 | 4.64      | 1.82-9.67  |
| Other            | 0.540 | 0.242-0.830 | 12.00     | 3.73-27.01 |

**Supplementary Table 5:** Segmentation performance of PANDA on the internal test cohort. We calculate the dice coefficient (DSC) and the 95 percentile of Hausdorf distance (HD95) on whole pancreas (including the lesion area), healthy pancreas area, and eight lesion subtypes.

| Reader | Lesion detection |          |               |         |       |          |               |         |
|--------|------------------|----------|---------------|---------|-------|----------|---------------|---------|
|        | Sens             | $\Delta$ | 95% CI        | p-value | Spec  | $\Delta$ | 95% CI        | p-value |
| PANDA  | 94.9             | -        | -             | -       | 100   | -        | -             | -       |
| S1     | 64.0             | 30.9     | (23.7 - 37.7) | 0.0002  | 100.0 | 0.0      | (0.0 - 0.0)   | 1.0000  |
| S2     | 82.3             | 12.6     | (6.7 - 18.7)  | 0.0004  | 87.9  | 12.1     | (6.2 - 18.4)  | 0.0006  |
| S3     | 89.1             | 5.7      | (1.8 - 10.2)  | 0.0110  | 93.1  | 6.9      | (2.6 - 11.8)  | 0.0074  |
| S4     | 88.0             | 6.9      | (3.3 - 10.5)  | 0.0006  | 98.3  | 1.7      | (0.0 - 4.4)   | 0.4978  |
| S5     | 82.3             | 12.6     | (7.2 - 18.3)  | 0.0002  | 100.0 | 0.0      | (0.0 - 0.0)   | 1.0000  |
| S6     | 86.3             | 8.6      | (4.2 - 13.3)  | 0.0002  | 98.3  | 1.7      | (0.0 - 4.3)   | 0.4914  |
| S7     | 84.6             | 10.3     | (5.5 - 15.7)  | 0.0004  | 95.7  | 4.3      | (0.9 - 8.2)   | 0.0634  |
| S8     | 78.3             | 16.6     | (10.4 - 22.2) | 0.0002  | 100.0 | 0.0      | (0.0 - 0.0)   | 1.0000  |
| S9     | 82.3             | 12.6     | (7.4 - 17.9)  | 0.0002  | 100.0 | 0.0      | (0.0 - 0.0)   | 1.0000  |
| S10    | 78.3             | 16.6     | (11.3 - 22.0) | 0.0002  | 99.1  | 0.9      | (0.0 - 2.7)   | 0.9960  |
| S11    | 86.9             | 8.0      | (2.9 - 12.9)  | 0.0022  | 94.0  | 6.0      | (2.0 - 10.4)  | 0.0136  |
| G1     | 86.3             | 8.6      | (4.0 - 13.4)  | 0.0012  | 74.1  | 25.9     | (17.9 - 33.9) | 0.0002  |
| G2     | 95.4             | -0.6     | (-4.1 - 2.6)  | 0.9894  | 49.1  | 50.9     | (42.2 - 60.0) | 0.0002  |
| G3     | 77.1             | 17.7     | (12.8 - 23.7) | 0.0002  | 98.3  | 1.7      | (0.0 - 4.5)   | 0.4946  |
| G4     | 81.1             | 13.7     | (8.4 - 19.5)  | 0.0002  | 93.1  | 6.9      | (2.6 - 11.9)  | 0.0082  |
| G5     | 78.3             | 16.6     | (11.0 - 22.1) | 0.0002  | 95.7  | 4.3      | (1.0 - 8.4)   | 0.0620  |
| G6     | 78.9             | 16.0     | (10.5 - 21.8) | 0.0002  | 89.7  | 10.3     | (5.5 - 16.5)  | 0.0010  |
| G7     | 83.4             | 11.4     | (6.3 - 16.3)  | 0.0002  | 95.7  | 4.3      | (0.9 - 8.2)   | 0.0564  |
| G8     | 83.4             | 11.4     | (6.1 - 17.0)  | 0.0002  | 92.2  | 7.8      | (3.2 - 13.5)  | 0.0044  |
| G9     | 87.4             | 7.4      | (2.8 - 12.0)  | 0.0022  | 90.5  | 9.5      | (4.7 - 14.5)  | 0.0012  |
| G10    | 84.0             | 10.9     | (5.8 - 16.1)  | 0.0004  | 92.2  | 7.8      | (3.3 - 13.2)  | 0.0046  |
| G11    | 79.4             | 15.4     | (9.7 - 21.4)  | 0.0002  | 100.0 | 0.0      | (0.0 - 0.0)   | 1.0000  |
| R1     | 60.0             | 34.9     | (27.7 - 41.8) | 0.0002  | 100.0 | 0.0      | (0.0 - 0.0)   | 1.0000  |
| R2     | 92.0             | 2.9      | (-1.7 - 7.3)  | 0.2944  | 91.4  | 8.6      | (3.8 - 13.6)  | 0.0022  |
| R3     | 77.1             | 17.7     | (12.0 - 23.4) | 0.0002  | 84.5  | 15.5     | (9.6 - 22.7)  | 0.0002  |
| R4     | 75.4             | 19.4     | (13.1 - 25.8) | 0.0002  | 96.6  | 3.4      | (0.8 - 7.2)   | 0.1144  |
| R5     | 73.1             | 21.7     | (15.7 - 28.4) | 0.0002  | 90.5  | 9.5      | (4.3 - 15.5)  | 0.0010  |
| R6     | 81.7             | 13.1     | (7.8 - 19.0)  | 0.0002  | 88.8  | 11.2     | (5.5 - 17.0)  | 0.0004  |
| R7     | 74.3             | 20.6     | (14.6 - 26.9) | 0.0002  | 97.4  | 2.6      | (0.0 - 5.6)   | 0.2504  |
| R8     | 77.1             | 17.7     | (12.3 - 23.7) | 0.0002  | 99.1  | 0.9      | (0.0 - 3.0)   | 1.0000  |
| R9     | 80.0             | 14.9     | (9.8 - 20.2)  | 0.0002  | 99.1  | 0.9      | (0.0 - 2.9)   | 0.9966  |
| R10    | 66.3             | 28.6     | (21.5 - 35.8) | 0.0002  | 94.8  | 5.2      | (1.7 - 9.6)   | 0.0302  |
| R11    | 70.9             | 24.0     | (16.8 - 31.0) | 0.0002  | 97.4  | 2.6      | (0.0 - 5.8)   | 0.2488  |
| Mean S | 82.0             | 12.8     | (8.9 - 17.0)  | 0.0002  | 96.9  | 3.1      | (2.0 - 4.1)   | 0.0002  |
| Mean G | 83.2             | 11.7     | (7.7 - 15.9)  | 0.0002  | 88.2  | 11.8     | (9.6 - 14.4)  | 0.0002  |
| Mean R | 75.3             | 19.6     | (15.2 - 23.9) | 0.0002  | 94.5  | 5.5      | (4.2 - 6.7)   | 0.0002  |
| Mean   | 80.2             | 14.7     | (10.8 - 18.8) | 0.0002  | 93.2  | 6.8      | (5.6 - 8.1)   | 0.0002  |

(a) Reader (noncontrast CT) vs. PANDA (noncontrast CT) by the evaluation of sensitivity and specificity for lesion detection (PDAC+non-PDAC vs. normal)

| Reader | PDAC identification |          |               |         |      |          |               |         |
|--------|---------------------|----------|---------------|---------|------|----------|---------------|---------|
|        | Sens                | $\Delta$ | 95% CI        | p-value | Spec | $\Delta$ | 95% CI        | p-value |
| PANDA  | 92.6                | -        | -             | -       | 97.3 | -        | -             | -       |
| S1     | 45.4                | 47.2     | (36.8 - 57.6) | 0.0002  | 88.5 | 8.7      | (4.7 - 13.2)  | 0.0004  |
| S2     | 71.3                | 21.3     | (11.6 - 30.8) | 0.0004  | 85.2 | 12.0     | (6.4 - 17.8)  | 0.0002  |
| S3     | 57.4                | 35.2     | (26.7 - 44.4) | 0.0002  | 93.4 | 3.8      | (0.0 - 7.9)   | 0.0954  |
| S4     | 85.2                | 7.4      | (0.8 - 14.9)  | 0.0792  | 94.5 | 2.7      | (-0.6 - 6.3)  | 0.2238  |
| S5     | 64.8                | 27.8     | (18.3 - 36.6) | 0.0002  | 97.8 | -0.5     | (-2.3 - 1.1)  | 0.9882  |
| S6     | 75.0                | 17.6     | (9.3 - 25.5)  | 0.0002  | 95.1 | 2.2      | (-0.6 - 5.5)  | 0.3452  |
| S7     | 69.4                | 23.1     | (14.9 - 32.3) | 0.0002  | 92.9 | 4.4      | (0.5 - 8.4)   | 0.0626  |
| S8     | 63.0                | 29.6     | (21.1 - 38.4) | 0.0002  | 97.8 | -0.5     | (-3.0 - 1.8)  | 0.9850  |
| S9     | 54.6                | 38.0     | (28.7 - 47.4) | 0.0002  | 96.2 | 1.1      | (-1.7 - 4.1)  | 0.7260  |
| S10    | 51.9                | 40.7     | (30.7 - 51.0) | 0.0002  | 96.7 | 0.5      | (-2.4 - 3.7)  | 1.0000  |
| S11    | 47.2                | 45.4     | (36.2 - 54.8) | 0.0002  | 96.2 | 1.1      | (-1.6 - 4.2)  | 0.7424  |
| G1     | 67.6                | 25.0     | (15.8 - 34.0) | 0.0002  | 68.9 | 28.4     | (21.6 - 35.4) | 0.0002  |
| G2     | 65.7                | 26.9     | (18.5 - 35.1) | 0.0002  | 89.6 | 7.7      | (3.2 - 12.3)  | 0.0026  |
| G3     | 63.9                | 28.7     | (21.0 - 37.3) | 0.0002  | 91.8 | 5.5      | (1.6 - 9.8)   | 0.0220  |
| G4     | 62.0                | 30.6     | (20.4 - 40.2) | 0.0002  | 84.7 | 12.6     | (7.1 - 17.9)  | 0.0002  |
| G5     | 44.4                | 48.1     | (38.9 - 57.5) | 0.0002  | 93.4 | 3.8      | (0.0 - 7.5)   | 0.0634  |
| G6     | 72.2                | 20.4     | (12.0 - 29.1) | 0.0002  | 79.2 | 18.0     | (12.1 - 24.2) | 0.0002  |
| G7     | 68.5                | 24.1     | (15.9 - 32.7) | 0.0002  | 94.5 | 2.7      | (-1.1 - 6.6)  | 0.2592  |
| G8     | 61.1                | 31.5     | (21.5 - 41.7) | 0.0002  | 94.0 | 3.3      | (-0.6 - 7.7)  | 0.2152  |
| G9     | 70.4                | 22.2     | (12.6 - 31.7) | 0.0004  | 90.7 | 6.6      | (2.6 - 10.8)  | 0.0066  |
| G10    | 60.2                | 32.4     | (22.3 - 41.9) | 0.0002  | 91.8 | 5.5      | (1.7 - 9.5)   | 0.0132  |
| G11    | 48.1                | 44.4     | (34.5 - 54.1) | 0.0002  | 97.3 | 0.0      | (-2.7 - 2.8)  | 1.0000  |
| R1     | 35.2                | 57.4     | (47.9 - 67.3) | 0.0002  | 85.8 | 11.5     | (6.8 - 16.4)  | 0.0002  |
| R2     | 76.9                | 15.7     | (8.0 - 23.7)  | 0.0002  | 86.3 | 10.9     | (6.0 - 15.8)  | 0.0002  |
| R3     | 16.7                | 75.9     | (68.0 - 83.5) | 0.0002  | 96.2 | 1.1      | (-1.8 - 4.0)  | 0.7240  |
| R4     | 40.7                | 51.9     | (40.4 - 62.5) | 0.0002  | 90.7 | 6.6      | (1.8 - 11.1)  | 0.0164  |
| R5     | 27.8                | 64.8     | (54.5 - 74.7) | 0.0002  | 97.8 | -0.5     | (-3.4 - 2.6)  | 1.0000  |
| R6     | 63.9                | 28.7     | (19.4 - 38.1) | 0.0002  | 92.9 | 4.4      | (0.5 - 8.5)   | 0.0570  |
| R7     | 64.8                | 27.8     | (19.3 - 36.5) | 0.0002  | 90.2 | 7.1      | (2.9 - 11.7)  | 0.0030  |
| R8     | 71.3                | 21.3     | (11.5 - 30.7) | 0.0002  | 88.0 | 9.3      | (4.3 - 14.0)  | 0.0006  |
| R9     | 63.0                | 29.6     | (20.8 - 38.4) | 0.0002  | 95.1 | 2.2      | (-1.1 - 5.9)  | 0.3954  |
| R10    | 42.6                | 50.0     | (40.8 - 60.5) | 0.0002  | 87.4 | 9.8      | (4.8 - 14.8)  | 0.0006  |
| R11    | 59.3                | 33.3     | (22.6 - 43.8) | 0.0002  | 82.5 | 14.8     | (9.5 - 20.7)  | 0.0002  |
| Mean S | 62.3                | 30.3     | (24.9 - 35.9) | 0.0002  | 94.0 | 3.2      | (1.5 - 5.1)   | 0.0038  |
| Mean G | 62.2                | 30.4     | (25.1 - 35.5) | 0.0002  | 88.7 | 8.5      | (6.0 - 11.2)  | 0.0002  |
| Mean R | 51.1                | 41.5     | (36.7 - 46.1) | 0.0002  | 90.3 | 7.0      | (4.8 - 9.3)   | 0.0002  |
| Mean   | 58.5                | 34.1     | (29.3 - 38.9) | 0.0002  | 91.0 | 6.3      | (4.1 - 8.4)   | 0.0002  |

(b) Reader (noncontrast CT) vs. PANDA (noncontrast CT) by the evaluation of sensitivity and specificity for PDAC identification (PDAC vs. nonPDAC + normal).

**Supplementary Table 6:** Reader (noncontrast CT) vs. PANDA (noncontrast CT) by sensitivity and specificity. Two-sided permutation tests were used to compute the statistical difference. S, pancreas specialist; G, general radiologist; R, radiology resident; Sens, sensitivity (%); Spec, specificity (%).



| Reader | Sens | Sens-A | $\Delta$ | Lesion detection |         |      |        |          | p-value       |        |
|--------|------|--------|----------|------------------|---------|------|--------|----------|---------------|--------|
|        |      |        |          | 95% CI           | p-value | Spec | Spec-A | $\Delta$ |               | 95% CI |
| S1     | 64.0 | 88.0   | 24.0     | (17.9 - 30.9)    | 0.0002  | 100  | 100    | 0.0      | (0.0 - 0.0)   | 1.0000 |
| S2     | 82.3 | 85.7   | 3.4      | (-4.2 - 10.8)    | 0.4604  | 87.9 | 98.3   | 10.3     | (3.6 - 16.7)  | 0.0040 |
| S3     | 89.1 | 92.6   | 3.4      | (0.6 - 6.5)      | 0.0654  | 93.1 | 99.1   | 6.0      | (2.0 - 10.8)  | 0.0168 |
| S4     | 88.0 | 94.3   | 6.3      | (2.4 - 10.4)     | 0.0036  | 98.3 | 98.3   | 0.0      | (-2.0 - 2.4)  | 1.0000 |
| S5     | 82.3 | 90.3   | 8.0      | (4.4 - 12.1)     | 0.0006  | 100  | 100    | 0.0      | (0.0 - 0.0)   | 1.0000 |
| S6     | 86.3 | 91.4   | 5.1      | (1.2 - 9.3)      | 0.0232  | 98.3 | 100    | 1.7      | (0.0 - 4.5)   | 0.4992 |
| S7     | 84.6 | 93.7   | 9.1      | (4.2 - 14.0)     | 0.0004  | 95.7 | 96.6   | 0.9      | (-4.1 - 6.0)  | 0.9862 |
| S8     | 78.3 | 83.4   | 5.1      | (2.2 - 8.5)      | 0.0034  | 100  | 100    | 0.0      | (0.0 - 0.0)   | 1.0000 |
| S9     | 82.3 | 91.4   | 9.1      | (5.0 - 13.9)     | 0.0002  | 100  | 100    | 0.0      | (0.0 - 0.0)   | 1.0000 |
| S10    | 78.3 | 84.6   | 6.3      | (2.9 - 9.9)      | 0.0016  | 99.1 | 100    | 0.9      | (0.0 - 2.7)   | 1.0000 |
| S11    | 86.9 | 88.6   | 1.7      | (0.0 - 3.8)      | 0.2478  | 94.0 | 94.0   | 0.0      | (-2.5 - 2.6)  | 1.0000 |
| G1     | 86.3 | 78.3   | -8.0     | (-14.2 - -2.2)   | 0.0196  | 74.1 | 98.3   | 24.1     | (16.8 - 32.0) | 0.0002 |
| G2     | 95.4 | 84.6   | -10.9    | (-15.6 - -6.1)   | 0.0002  | 49.1 | 96.6   | 47.4     | (37.1 - 57.3) | 0.0002 |
| G3     | 77.1 | 79.4   | 2.3      | (-3.4 - 8.0)     | 0.5672  | 98.3 | 100    | 1.7      | (0.0 - 4.3)   | 0.5018 |
| G4     | 81.1 | 92.6   | 11.4     | (6.3 - 16.4)     | 0.0002  | 93.1 | 99.1   | 6.0      | (1.9 - 10.6)  | 0.0152 |
| G5     | 78.3 | 88.6   | 10.3     | (4.7 - 15.7)     | 0.0004  | 95.7 | 100    | 4.3      | (0.9 - 8.0)   | 0.0622 |
| G6     | 78.9 | 90.9   | 12.0     | (7.1 - 17.5)     | 0.0002  | 89.7 | 94.8   | 5.2      | (-0.9 - 11.8) | 0.1760 |
| G7     | 83.4 | 88.0   | 4.6      | (1.1 - 8.6)      | 0.0406  | 95.7 | 99.1   | 3.4      | (0.8 - 7.5)   | 0.1218 |
| G8     | 83.4 | 89.7   | 6.3      | (0.6 - 12.1)     | 0.0540  | 92.2 | 98.3   | 6.0      | (1.0 - 11.3)  | 0.0396 |
| G9     | 87.4 | 93.7   | 6.3      | (2.2 - 10.9)     | 0.0098  | 90.5 | 95.7   | 5.2      | (0.0 - 11.5)  | 0.1444 |
| G10    | 84.0 | 88.6   | 4.6      | (0.6 - 8.6)      | 0.0378  | 92.2 | 97.4   | 5.2      | (0.9 - 10.3)  | 0.0692 |
| G11    | 79.4 | 88.6   | 9.1      | (5.0 - 13.3)     | 0.0002  | 100  | 99.1   | -0.9     | (-2.8 - 0.0)  | 1.0000 |
| R1     | 60.0 | 94.9   | 34.9     | (27.7 - 42.3)    | 0.0002  | 100  | 100    | 0.0      | (0.0 - 0.0)   | 1.0000 |
| R2     | 92.0 | 87.4   | -4.6     | (-8.2 - -1.2)    | 0.0210  | 91.4 | 100    | 8.6      | (3.7 - 13.9)  | 0.0028 |
| R3     | 77.1 | 88.0   | 10.9     | (5.0 - 17.0)     | 0.0008  | 84.5 | 96.6   | 12.1     | (4.6 - 19.3)  | 0.0044 |
| R4     | 75.4 | 92.6   | 17.1     | (11.5 - 23.7)    | 0.0002  | 96.6 | 100    | 3.4      | (0.8 - 7.4)   | 0.1230 |
| R5     | 73.1 | 89.7   | 16.6     | (9.9 - 23.1)     | 0.0002  | 90.5 | 98.3   | 7.8      | (3.4 - 12.8)  | 0.0048 |
| R6     | 81.7 | 89.1   | 7.4      | (2.2 - 12.6)     | 0.0106  | 88.8 | 96.6   | 7.8      | (1.8 - 13.9)  | 0.0210 |
| R7     | 74.3 | 86.9   | 12.6     | (7.4 - 18.2)     | 0.0002  | 97.4 | 100    | 2.6      | (0.0 - 5.4)   | 0.2452 |
| R8     | 77.1 | 93.7   | 16.6     | (10.8 - 22.4)    | 0.0002  | 99.1 | 100    | 0.9      | (0.0 - 2.8)   | 1.0000 |
| R9     | 80.0 | 86.9   | 6.9      | (2.1 - 11.7)     | 0.0120  | 99.1 | 99.1   | 0.0      | (-2.7 - 2.5)  | 1.0000 |
| R10    | 66.3 | 84.0   | 17.7     | (10.6 - 24.4)    | 0.0002  | 94.8 | 98.3   | 3.4      | (-0.9 - 8.6)  | 0.2908 |
| R11    | 70.9 | 84.0   | 13.1     | (8.3 - 18.8)     | 0.0002  | 97.4 | 97.4   | 0.0      | (-4.4 - 3.9)  | 1.0000 |
| Mean S | 82.0 | 89.5   | 7.4      | (5.6 - 9.4)      | 0.0002  | 96.9 | 98.7   | 1.8      | (0.9 - 2.8)   | 0.0008 |
| Mean G | 83.2 | 87.5   | 4.4      | (2.5 - 6.3)      | 0.0002  | 88.2 | 98.0   | 9.8      | (7.7 - 12.2)  | 0.0002 |
| Mean R | 75.3 | 88.8   | 13.6     | (10.7 - 16.6)    | 0.0002  | 94.5 | 98.7   | 4.2      | (2.9 - 5.5)   | 0.0002 |
| Mean   | 80.2 | 88.6   | 8.5      | (6.5 - 10.3)     | 0.0002  | 93.2 | 98.5   | 5.3      | (4.3 - 6.3)   | 0.0002 |

(a) Reader (noncontrast CT) vs. Reader+PANDA assistance (noncontrast CT) by the evaluation of sensitivity and specificity for lesion detection (PDAC+non-PDAC vs. normal)

| Reader | Sens | Sens-A | $\Delta$ | PDAC identification |         |      |        |          | p-value        |        |
|--------|------|--------|----------|---------------------|---------|------|--------|----------|----------------|--------|
|        |      |        |          | 95% CI              | p-value | Spec | Spec-A | $\Delta$ |                | 95% CI |
| S1     | 45.4 | 79.6   | 34.3     | (24.0 - 45.1)       | 0.0002  | 88.5 | 94.5   | 6.0      | (1.5 - 10.8)   | 0.0194 |
| S2     | 71.3 | 70.4   | -0.9     | (-13.0 - 11.1)      | 0.9878  | 85.2 | 94.0   | 8.7      | (3.0 - 14.1)   | 0.0028 |
| S3     | 57.4 | 81.5   | 24.1     | (16.0 - 32.3)       | 0.0002  | 93.4 | 95.1   | 1.6      | (-1.1 - 4.6)   | 0.4652 |
| S4     | 85.2 | 94.4   | 9.3      | (2.8 - 16.5)        | 0.0200  | 94.5 | 93.4   | -1.1     | (-4.2 - 1.7)   | 0.7242 |
| S5     | 64.8 | 79.6   | 14.8     | (7.8 - 22.1)        | 0.0004  | 97.8 | 97.8   | 0.0      | (0.0 - 0.0)    | 1.0000 |
| S6     | 75.0 | 87.0   | 12.0     | (4.9 - 19.6)        | 0.0038  | 95.1 | 97.8   | 2.7      | (-0.5 - 6.1)   | 0.1814 |
| S7     | 69.4 | 90.7   | 21.3     | (11.4 - 30.2)       | 0.0002  | 92.9 | 95.1   | 2.2      | (-2.1 - 6.3)   | 0.4634 |
| S8     | 63.0 | 70.4   | 7.4      | (2.9 - 12.4)        | 0.0070  | 97.8 | 97.8   | 0.0      | (0.0 - 0.0)    | 1.0000 |
| S9     | 54.6 | 79.6   | 25.0     | (16.0 - 33.9)       | 0.0002  | 96.2 | 98.4   | 2.2      | (-0.5 - 4.8)   | 0.2186 |
| S10    | 51.9 | 67.6   | 15.7     | (9.0 - 22.0)        | 0.0002  | 96.7 | 97.8   | 1.1      | (-1.0 - 3.5)   | 0.6118 |
| S11    | 47.2 | 55.6   | 8.3      | (3.6 - 14.1)        | 0.0044  | 96.2 | 95.6   | -0.5     | (-1.7 - 0.0)   | 1.0000 |
| G1     | 67.6 | 62.0   | -5.6     | (-16.8 - 6.5)       | 0.4324  | 68.9 | 93.4   | 24.6     | (17.9 - 32.0)  | 0.0002 |
| G2     | 65.7 | 62.0   | -3.7     | (-13.0 - 5.7)       | 0.5578  | 89.6 | 79.8   | -9.8     | (-16.4 - -3.4) | 0.0062 |
| G3     | 63.9 | 74.1   | 10.2     | (2.0 - 17.8)        | 0.0302  | 91.8 | 97.3   | 5.5      | (1.9 - 9.2)    | 0.0078 |
| G4     | 62.0 | 90.7   | 28.7     | (20.2 - 37.6)       | 0.0002  | 84.7 | 78.1   | -6.6     | (-12.0 - -1.1) | 0.0384 |
| G5     | 44.4 | 74.1   | 29.6     | (20.0 - 38.5)       | 0.0002  | 93.4 | 97.8   | 4.4      | (1.1 - 7.7)    | 0.0250 |
| G6     | 72.2 | 88.9   | 16.7     | (9.5 - 24.6)        | 0.0002  | 79.2 | 88.5   | 9.3      | (3.3 - 15.3)   | 0.0040 |
| G7     | 68.5 | 75.0   | 6.5      | (1.8 - 11.6)        | 0.0356  | 94.5 | 95.1   | 0.5      | (-2.2 - 3.7)   | 1.0000 |
| G8     | 61.1 | 87.0   | 25.9     | (16.1 - 35.7)       | 0.0002  | 94.0 | 95.1   | 1.1      | (-2.6 - 4.8)   | 0.7588 |
| G9     | 70.4 | 93.5   | 23.1     | (14.1 - 31.8)       | 0.0002  | 90.7 | 90.2   | -0.5     | (-5.0 - 3.8)   | 1.0000 |
| G10    | 60.2 | 69.4   | 9.3      | (2.1 - 17.1)        | 0.0320  | 91.8 | 92.3   | 0.5      | (-2.9 - 4.3)   | 0.9970 |
| G11    | 48.1 | 78.7   | 30.6     | (20.8 - 40.4)       | 0.0002  | 97.3 | 96.2   | -1.1     | (-4.2 - 1.8)   | 0.7328 |
| R1     | 35.2 | 90.7   | 55.6     | (45.0 - 65.5)       | 0.0002  | 85.8 | 97.3   | 11.5     | (6.1 - 16.9)   | 0.0004 |
| R2     | 76.9 | 74.1   | -2.8     | (-10.8 - 5.8)       | 0.6620  | 86.3 | 96.2   | 9.8      | (5.7 - 14.5)   | 0.0004 |
| R3     | 16.7 | 75.0   | 58.3     | (48.4 - 68.3)       | 0.0002  | 96.2 | 93.4   | -2.7     | (-6.6 - 1.1)   | 0.2586 |
| R4     | 40.7 | 83.3   | 42.6     | (31.4 - 53.6)       | 0.0002  | 90.7 | 92.3   | 1.6      | (-2.8 - 6.4)   | 0.6684 |
| R5     | 27.8 | 80.6   | 52.8     | (43.2 - 62.5)       | 0.0002  | 97.8 | 95.1   | -2.7     | (-6.7 - 1.1)   | 0.2650 |
| R6     | 63.9 | 73.1   | 9.3      | (0.0 - 18.7)        | 0.0748  | 92.9 | 96.7   | 3.8      | (1.1 - 7.3)    | 0.0438 |
| R7     | 64.8 | 89.8   | 25.0     | (17.1 - 33.9)       | 0.0002  | 90.2 | 95.1   | 4.9      | (1.1 - 8.8)    | 0.0252 |
| R8     | 71.3 | 93.5   | 22.2     | (13.3 - 30.7)       | 0.0002  | 88.0 | 96.2   | 8.2      | (4.1 - 12.6)   | 0.0002 |
| R9     | 63.0 | 82.4   | 19.4     | (12.2 - 28.2)       | 0.0002  | 95.1 | 97.3   | 2.2      | (-0.6 - 5.3)   | 0.2984 |
| R10    | 42.6 | 70.4   | 27.8     | (16.7 - 38.5)       | 0.0002  | 87.4 | 92.9   | 5.5      | (1.1 - 10.2)   | 0.0452 |
| R11    | 59.3 | 83.3   | 24.1     | (15.8 - 33.3)       | 0.0002  | 82.5 | 91.3   | 8.7      | (3.5 - 13.7)   | 0.0026 |
| Mean S | 62.3 | 77.9   | 15.6     | (12.2 - 18.8)       | 0.0002  | 94.0 | 96.1   | 2.1      | (1.0 - 3.2)    | 0.0002 |
| Mean G | 62.2 | 77.8   | 15.6     | (12.5 - 18.6)       | 0.0002  | 88.7 | 91.3   | 2.5      | (1.0 - 4.1)    | 0.0012 |
| Mean R | 51.1 | 81.5   | 30.4     | (26.1 - 34.4)       | 0.0002  | 90.3 | 94.9   | 4.6      | (3.0 - 6.2)    | 0.0002 |
| Mean   | 58.5 | 79.0   | 20.5     | (17.8 - 23.4)       | 0.0002  | 91.0 | 94.1   | 3.1      | (2.1 - 4.1)    | 0.0002 |

(b) Reader (noncontrast CT) vs. Reader+PANDA assistance (noncontrast CT) by the evaluation of sensitivity and specificity for PDAC identification (PDAC vs. nonPDAC + normal).

**Supplementary Table 7:** The impact of PANDA assistance on reader performance on noncontrast CT by sensitivity and specificity. Two-sided permutation tests were used to compute the statistical difference. S, pancreas specialist; G, general radiologist; R, radiology resident; Sens, sensitivity; Sens-A, sensitivity with PANDA assistance; Spec, specificity; Spec-A, specificity with PANDA assistance.

| Reader | Lesion detection |          |               |         |      |          |               |         |
|--------|------------------|----------|---------------|---------|------|----------|---------------|---------|
|        | Acc              | $\Delta$ | 95% CI        | p-value | BAcc | $\Delta$ | 95% CI        | p-value |
| PANDA  | 96.9             | -        | -             | -       | 97.4 | -        | -             | -       |
| S1     | 78.4             | 18.6     | (13.7 - 23.0) | 0.0002  | 82.0 | 15.4     | (11.9 - 18.9) | 0.0002  |
| S2     | 84.5             | 12.4     | (7.9 - 16.8)  | 0.0002  | 85.1 | 12.3     | (8.1 - 16.7)  | 0.0002  |
| S3     | 90.7             | 6.2      | (3.4 - 9.3)   | 0.0002  | 91.1 | 6.3      | (3.5 - 9.5)   | 0.0002  |
| S4     | 92.1             | 4.8      | (2.4 - 7.2)   | 0.0002  | 93.1 | 4.3      | (2.1 - 6.5)   | 0.0002  |
| S5     | 89.3             | 7.6      | (4.1 - 11.0)  | 0.0002  | 91.1 | 6.3      | (3.6 - 9.1)   | 0.0002  |
| S6     | 91.1             | 5.8      | (3.1 - 8.9)   | 0.0002  | 92.3 | 5.1      | (2.6 - 7.8)   | 0.0002  |
| S7     | 89.0             | 7.9      | (4.8 - 11.3)  | 0.0002  | 90.1 | 7.3      | (4.4 - 10.5)  | 0.0002  |
| S8     | 86.9             | 10.0     | (6.2 - 13.4)  | 0.0002  | 89.1 | 8.3      | (5.2 - 11.1)  | 0.0002  |
| S9     | 89.3             | 7.6      | (4.5 - 11.0)  | 0.0002  | 91.1 | 6.3      | (3.7 - 8.9)   | 0.0002  |
| S10    | 86.6             | 10.3     | (6.9 - 13.7)  | 0.0002  | 88.7 | 8.7      | (6.0 - 11.4)  | 0.0002  |
| S11    | 89.7             | 7.2      | (3.8 - 10.7)  | 0.0002  | 90.4 | 7.0      | (3.6 - 10.0)  | 0.0002  |
| G1     | 81.4             | 15.5     | (11.3 - 19.6) | 0.0002  | 80.2 | 17.2     | (12.8 - 21.9) | 0.0002  |
| G2     | 77.0             | 19.9     | (14.8 - 25.1) | 0.0002  | 72.3 | 25.1     | (20.3 - 30.0) | 0.0002  |
| G3     | 85.6             | 11.3     | (7.9 - 15.1)  | 0.0002  | 87.7 | 9.7      | (7.0 - 12.8)  | 0.0002  |
| G4     | 85.9             | 11.0     | (7.2 - 15.1)  | 0.0002  | 87.1 | 10.3     | (6.9 - 13.9)  | 0.0002  |
| G5     | 85.2             | 11.7     | (8.2 - 15.5)  | 0.0002  | 87.0 | 10.4     | (7.3 - 13.9)  | 0.0002  |
| G6     | 83.2             | 13.7     | (9.6 - 18.2)  | 0.0002  | 84.3 | 13.2     | (9.3 - 17.5)  | 0.0002  |
| G7     | 86.3             | 8.6      | (5.2 - 12.0)  | 0.0002  | 89.6 | 7.9      | (4.6 - 11.1)  | 0.0002  |
| G8     | 86.9             | 10.0     | (6.2 - 14.1)  | 0.0002  | 87.8 | 9.6      | (6.1 - 13.3)  | 0.0002  |
| G9     | 88.7             | 8.2      | (4.8 - 11.7)  | 0.0002  | 89.0 | 8.5      | (5.0 - 11.8)  | 0.0002  |
| G10    | 87.3             | 9.6      | (6.2 - 13.4)  | 0.0002  | 88.1 | 9.3      | (6.0 - 12.8)  | 0.0002  |
| G11    | 87.6             | 9.3      | (5.8 - 13.1)  | 0.0002  | 89.7 | 7.7      | (4.9 - 10.7)  | 0.0002  |
| R1     | 75.9             | 21.0     | (16.2 - 25.8) | 0.0002  | 80.0 | 17.4     | (13.8 - 20.9) | 0.0002  |
| R2     | 91.8             | 5.2      | (1.7 - 8.6)   | 0.0036  | 91.7 | 5.7      | (2.5 - 9.1)   | 0.0006  |
| R3     | 80.1             | 16.8     | (12.7 - 21.3) | 0.0002  | 80.8 | 16.6     | (12.5 - 21.2) | 0.0002  |
| R4     | 83.8             | 13.1     | (8.9 - 17.2)  | 0.0002  | 86.0 | 11.4     | (7.8 - 15.1)  | 0.0002  |
| R5     | 80.1             | 16.8     | (12.4 - 21.6) | 0.0002  | 81.8 | 15.6     | (11.6 - 20.0) | 0.0002  |
| R6     | 84.5             | 12.4     | (8.6 - 16.2)  | 0.0002  | 85.3 | 12.2     | (8.2 - 16.2)  | 0.0002  |
| R7     | 83.5             | 13.4     | (9.6 - 17.5)  | 0.0002  | 85.8 | 11.6     | (8.2 - 15.1)  | 0.0002  |
| R8     | 85.9             | 11.0     | (7.6 - 14.8)  | 0.0002  | 88.1 | 9.3      | (6.4 - 12.5)  | 0.0002  |
| R9     | 87.6             | 9.3      | (6.2 - 12.7)  | 0.0002  | 89.6 | 7.9      | (5.3 - 10.8)  | 0.0002  |
| R10    | 77.7             | 19.2     | (14.8 - 24.1) | 0.0002  | 80.6 | 16.9     | (13.1 - 20.9) | 0.0002  |
| R11    | 81.4             | 15.5     | (11.0 - 20.3) | 0.0002  | 84.1 | 13.3     | (9.2 - 17.0)  | 0.0002  |
| Mean S | 88.0             | 8.9      | (6.4 - 11.6)  | 0.0002  | 89.5 | 7.9      | (5.9 - 9.9)   | 0.0002  |
| Mean G | 85.2             | 11.7     | (9.2 - 14.3)  | 0.0002  | 85.7 | 11.7     | (9.5 - 14.0)  | 0.0002  |
| Mean R | 82.9             | 14.0     | (11.2 - 16.9) | 0.0002  | 84.9 | 12.5     | (10.2 - 14.9) | 0.0002  |
| Mean   | 85.4             | 11.5     | (9.1 - 14.1)  | 0.0002  | 86.7 | 10.7     | (8.6 - 12.9)  | 0.0002  |

(a) Reader (noncontrast CT) vs. PANDA (noncontrast CT) by the evaluation of accuracy and balanced accuracy for lesion detection (PDAC+non-PDAC vs. normal)

| Reader | PDAC identification |          |               |         |      |          |               |         |
|--------|---------------------|----------|---------------|---------|------|----------|---------------|---------|
|        | Acc                 | $\Delta$ | 95% CI        | p-value | BAcc | $\Delta$ | 95% CI        | p-value |
| PANDA  | 95.5                | -        | -             | -       | 94.9 | -        | -             | -       |
| S1     | 72.5                | 23.0     | (17.9 - 28.2) | 0.0002  | 66.9 | 28.0     | (22.3 - 33.8) | 0.0002  |
| S2     | 80.1                | 15.5     | (10.0 - 20.3) | 0.0002  | 78.3 | 16.7     | (10.7 - 22.2) | 0.0002  |
| S3     | 80.1                | 15.5     | (11.0 - 19.9) | 0.0002  | 75.4 | 19.5     | (14.5 - 24.6) | 0.0002  |
| S4     | 91.1                | 4.5      | (1.0 - 7.9)   | 0.0188  | 89.9 | 5.1      | (1.2 - 9.1)   | 0.0160  |
| S5     | 85.6                | 10.0     | (6.2 - 13.7)  | 0.0002  | 81.3 | 13.6     | (8.9 - 18.1)  | 0.0002  |
| S6     | 87.6                | 7.9      | (4.5 - 11.7)  | 0.0002  | 85.0 | 9.9      | (5.5 - 14.5)  | 0.0002  |
| S7     | 84.2                | 11.3     | (7.2 - 16.2)  | 0.0002  | 81.2 | 13.8     | (9.0 - 19.0)  | 0.0002  |
| S8     | 84.9                | 10.7     | (6.9 - 14.4)  | 0.0002  | 80.4 | 14.5     | (10.3 - 19.1) | 0.0002  |
| S9     | 80.8                | 14.8     | (10.6 - 19.3) | 0.0002  | 75.4 | 19.5     | (14.8 - 24.3) | 0.0002  |
| S10    | 80.1                | 15.5     | (11.0 - 20.3) | 0.0002  | 74.3 | 20.6     | (15.2 - 25.9) | 0.0002  |
| S11    | 78.0                | 17.5     | (13.1 - 22.3) | 0.0002  | 71.7 | 23.2     | (18.3 - 28.1) | 0.0002  |
| G1     | 68.4                | 27.1     | (21.6 - 32.6) | 0.0002  | 68.2 | 26.7     | (20.7 - 32.6) | 0.0002  |
| G2     | 80.8                | 14.8     | (10.3 - 19.2) | 0.0002  | 77.7 | 17.3     | (12.6 - 21.9) | 0.0002  |
| G3     | 81.4                | 14.1     | (10.3 - 18.6) | 0.0002  | 77.8 | 17.1     | (12.7 - 22.3) | 0.0002  |
| G4     | 76.3                | 19.2     | (13.7 - 24.1) | 0.0002  | 73.4 | 21.6     | (15.4 - 27.1) | 0.0002  |
| G5     | 75.3                | 20.3     | (15.8 - 25.1) | 0.0002  | 68.9 | 26.0     | (20.9 - 31.0) | 0.0002  |
| G6     | 76.6                | 18.9     | (13.7 - 24.1) | 0.0002  | 75.7 | 19.2     | (13.8 - 25.0) | 0.0002  |
| G7     | 84.9                | 10.7     | (6.5 - 14.8)  | 0.0002  | 81.5 | 13.4     | (8.9 - 18.1)  | 0.0002  |
| G8     | 81.8                | 13.7     | (8.9 - 18.6)  | 0.0002  | 77.6 | 17.4     | (11.8 - 22.8) | 0.0002  |
| G9     | 83.2                | 12.4     | (7.9 - 17.2)  | 0.0002  | 80.5 | 14.4     | (9.1 - 19.6)  | 0.0004  |
| G10    | 80.1                | 15.5     | (11.0 - 20.3) | 0.0002  | 76.0 | 18.9     | (13.7 - 24.4) | 0.0002  |
| G11    | 79.0                | 16.5     | (11.7 - 21.0) | 0.0002  | 72.7 | 22.2     | (16.9 - 27.6) | 0.0002  |
| R1     | 67.0                | 28.5     | (23.7 - 33.7) | 0.0002  | 60.5 | 34.4     | (29.1 - 39.9) | 0.0002  |
| R2     | 82.8                | 12.7     | (8.6 - 16.8)  | 0.0002  | 81.6 | 13.3     | (8.7 - 18.1)  | 0.0002  |
| R3     | 66.7                | 28.9     | (23.4 - 34.0) | 0.0002  | 56.4 | 38.5     | (34.1 - 42.7) | 0.0002  |
| R4     | 72.2                | 23.4     | (17.5 - 29.2) | 0.0002  | 65.7 | 29.2     | (22.9 - 35.3) | 0.0002  |
| R5     | 71.8                | 23.7     | (18.2 - 28.9) | 0.0002  | 62.8 | 32.1     | (26.7 - 37.3) | 0.0002  |
| R6     | 82.1                | 13.4     | (9.3 - 17.5)  | 0.0002  | 78.4 | 16.5     | (11.6 - 21.4) | 0.0002  |
| R7     | 80.8                | 14.8     | (10.3 - 19.3) | 0.0002  | 77.5 | 17.4     | (12.6 - 22.3) | 0.0002  |
| R8     | 81.8                | 13.7     | (8.9 - 18.2)  | 0.0002  | 79.6 | 15.3     | (9.7 - 20.5)  | 0.0002  |
| R9     | 83.2                | 12.4     | (8.2 - 16.5)  | 0.0002  | 79.0 | 15.9     | (11.1 - 20.6) | 0.0002  |
| R10    | 70.8                | 24.7     | (19.9 - 30.2) | 0.0002  | 65.0 | 29.9     | (24.5 - 35.8) | 0.0002  |
| R11    | 73.9                | 21.6     | (16.5 - 26.8) | 0.0002  | 70.9 | 24.0     | (18.2 - 29.9) | 0.0002  |
| Mean S | 82.3                | 13.3     | (10.6 - 16.2) | 0.0002  | 78.2 | 16.8     | (13.9 - 19.6) | 0.0002  |
| Mean G | 78.9                | 16.7     | (13.6 - 19.8) | 0.0002  | 75.5 | 19.5     | (16.3 - 22.5) | 0.0002  |
| Mean R | 75.7                | 19.8     | (16.6 - 22.8) | 0.0002  | 70.7 | 24.3     | (21.6 - 26.9) | 0.0002  |
| Mean   | 79.0                | 16.6     | (13.8 - 19.4) | 0.0002  | 74.8 | 20.2     | (17.6 - 22.7) | 0.0002  |

(b) Reader (noncontrast CT) vs. PANDA (noncontrast CT) by the evaluation of accuracy and balanced accuracy for PDAC identification (PDAC vs. nonPDAC + normal).

**Supplementary Table 8:** Reader (noncontrast CT) vs. PANDA (noncontrast CT) by accuracy and balanced accuracy. Two-sided permutation tests were used to compute the statistical difference. S, pancreas specialist; G, general radiologist; R, radiology resident; Acc, accuracy; BAcc, balanced accuracy.

| Reader | Acc  | Acc-A | $\Delta$ | Lesion detection |         |      |        |          |               |         |
|--------|------|-------|----------|------------------|---------|------|--------|----------|---------------|---------|
|        |      |       |          | 95% CI           | p-value | BAcc | BAcc-A | $\Delta$ | 95% CI        | p-value |
| S1     | 78.4 | 92.8  | 14.4     | (10.3 - 18.6)    | 0.0002  | 82.0 | 94.0   | 12.0     | (8.9 - 15.5)  | 0.0002  |
| S2     | 84.5 | 90.7  | 6.2      | (0.7 - 11.0)     | 0.0288  | 85.1 | 92.0   | 6.9      | (1.8 - 11.3)  | 0.0056  |
| S3     | 90.7 | 95.2  | 4.5      | (2.1 - 6.9)      | 0.0012  | 91.1 | 95.9   | 4.7      | (2.3 - 7.5)   | 0.0008  |
| S4     | 92.1 | 95.9  | 3.8      | (1.4 - 6.2)      | 0.0072  | 93.1 | 96.3   | 3.1      | (0.9 - 5.5)   | 0.0072  |
| S5     | 89.3 | 94.2  | 4.8      | (2.7 - 7.2)      | 0.0006  | 91.1 | 95.1   | 4.0      | (2.2 - 6.0)   | 0.0006  |
| S6     | 91.1 | 94.8  | 3.8      | (1.4 - 6.5)      | 0.0070  | 92.3 | 95.7   | 3.4      | (1.4 - 5.9)   | 0.0062  |
| S7     | 89.0 | 94.8  | 5.8      | (2.1 - 9.6)      | 0.0026  | 90.1 | 95.1   | 5.0      | (1.6 - 8.8)   | 0.0086  |
| S8     | 86.9 | 90.0  | 3.1      | (1.4 - 5.2)      | 0.0034  | 89.1 | 91.7   | 2.6      | (1.1 - 4.2)   | 0.0034  |
| S9     | 89.3 | 94.8  | 5.5      | (3.1 - 8.3)      | 0.0002  | 91.1 | 95.7   | 4.6      | (2.5 - 7.0)   | 0.0002  |
| S10    | 86.6 | 90.7  | 4.1      | (2.1 - 6.5)      | 0.0010  | 88.7 | 92.3   | 3.6      | (1.8 - 5.5)   | 0.0010  |
| S11    | 89.7 | 90.7  | 1.0      | (-0.3 - 2.4)     | 0.3624  | 90.4 | 91.3   | 0.9      | (-0.6 - 2.3)  | 0.3624  |
| G1     | 81.4 | 86.3  | 4.8      | (-1.0 - 10.0)    | 0.0942  | 80.2 | 88.3   | 8.1      | (3.0 - 13.2)  | 0.0024  |
| G2     | 77.0 | 89.3  | 12.4     | (7.2 - 18.2)     | 0.0004  | 72.3 | 90.6   | 18.3     | (13.1 - 23.8) | 0.0002  |
| G3     | 85.6 | 87.6  | 2.1      | (-1.4 - 5.5)     | 0.3688  | 87.7 | 89.7   | 2.0      | (-1.0 - 5.2)  | 0.2558  |
| G4     | 85.9 | 95.2  | 9.3      | (5.8 - 13.1)     | 0.0002  | 87.1 | 95.9   | 8.7      | (5.4 - 12.3)  | 0.0002  |
| G5     | 85.2 | 93.1  | 7.9      | (4.1 - 11.3)     | 0.0002  | 87.0 | 94.3   | 7.3      | (4.0 - 10.3)  | 0.0002  |
| G6     | 83.2 | 92.4  | 9.3      | (5.5 - 13.7)     | 0.0002  | 84.3 | 92.8   | 8.6      | (4.7 - 13.0)  | 0.0002  |
| G7     | 88.3 | 92.4  | 4.1      | (1.7 - 6.9)      | 0.0036  | 89.6 | 93.6   | 4.0      | (1.6 - 6.6)   | 0.0016  |
| G8     | 86.9 | 93.1  | 6.2      | (2.1 - 10.0)     | 0.0042  | 87.8 | 94.0   | 6.2      | (2.4 - 10.0)  | 0.0014  |
| G9     | 88.7 | 94.5  | 5.8      | (2.4 - 9.6)      | 0.0022  | 89.0 | 94.7   | 5.7      | (2.2 - 9.6)   | 0.0030  |
| G10    | 87.3 | 92.1  | 4.8      | (1.7 - 7.9)      | 0.0030  | 88.1 | 93.0   | 4.9      | (1.9 - 8.0)   | 0.0026  |
| G11    | 87.6 | 92.8  | 5.2      | (2.4 - 7.9)      | 0.0006  | 89.7 | 93.9   | 4.1      | (1.9 - 6.6)   | 0.0006  |
| R1     | 75.9 | 96.9  | 21.0     | (16.5 - 25.8)    | 0.0002  | 80.0 | 97.4   | 17.4     | (13.9 - 21.1) | 0.0002  |
| R2     | 91.8 | 92.4  | 0.7      | (-2.4 - 3.4)     | 0.8314  | 91.7 | 93.7   | 2.0      | (-1.0 - 5.2)  | 0.1900  |
| R3     | 80.1 | 91.4  | 11.3     | (6.5 - 16.2)     | 0.0002  | 80.8 | 92.3   | 11.5     | (6.6 - 16.5)  | 0.0002  |
| R4     | 83.8 | 95.5  | 11.7     | (7.9 - 15.8)     | 0.0002  | 86.0 | 96.3   | 10.3     | (7.0 - 14.1)  | 0.0002  |
| R5     | 80.1 | 93.1  | 13.1     | (8.9 - 17.5)     | 0.0002  | 81.8 | 94.0   | 12.2     | (8.3 - 16.3)  | 0.0002  |
| R6     | 84.5 | 92.1  | 7.6      | (3.4 - 11.7)     | 0.0004  | 85.3 | 92.8   | 7.6      | (3.5 - 11.6)  | 0.0002  |
| R7     | 83.5 | 92.1  | 8.6      | (5.2 - 12.0)     | 0.0002  | 85.8 | 93.4   | 7.6      | (4.6 - 10.8)  | 0.0002  |
| R8     | 85.9 | 96.2  | 10.3     | (6.9 - 14.1)     | 0.0002  | 88.1 | 96.9   | 8.7      | (5.7 - 12.0)  | 0.0002  |
| R9     | 87.6 | 91.8  | 4.1      | (0.7 - 7.2)      | 0.0186  | 89.6 | 93.0   | 3.4      | (0.5 - 6.3)   | 0.0184  |
| R10    | 77.7 | 89.7  | 12.0     | (7.2 - 16.8)     | 0.0002  | 80.6 | 91.1   | 10.6     | (6.0 - 14.9)  | 0.0002  |
| R11    | 81.4 | 89.3  | 7.9      | (4.5 - 11.7)     | 0.0002  | 84.1 | 90.7   | 6.6      | (3.6 - 9.9)   | 0.0002  |
| Mean S | 88.0 | 93.2  | 5.2      | (4.0 - 6.4)      | 0.0002  | 89.5 | 94.1   | 4.6      | (3.6 - 5.7)   | 0.0002  |
| Mean G | 85.2 | 91.7  | 6.5      | (5.0 - 8.1)      | 0.0002  | 85.7 | 92.8   | 7.1      | (5.6 - 8.7)   | 0.0002  |
| Mean R | 82.9 | 92.8  | 9.8      | (8.0 - 11.8)     | 0.0002  | 84.9 | 93.8   | 8.9      | (7.3 - 10.6)  | 0.0002  |
| Mean   | 85.4 | 92.6  | 7.2      | (6.0 - 8.4)      | 0.0002  | 86.7 | 93.6   | 6.9      | (5.8 - 8.0)   | 0.0002  |

(a) Reader (noncontrast CT) vs. Reader+PANDA assistance (noncontrast CT) by the evaluation of accuracy and balanced accuracy for lesion detection (PDAC+non-PDAC vs. normal)

| Reader | Acc  | Acc-A | $\Delta$ | PDAC identification |         |      |        |          |                |         |
|--------|------|-------|----------|---------------------|---------|------|--------|----------|----------------|---------|
|        |      |       |          | 95% CI              | p-value | BAcc | BAcc-A | $\Delta$ | 95% CI         | p-value |
| S1     | 72.5 | 89.0  | 16.5     | (11.3 - 21.6)       | 0.0002  | 66.9 | 87.1   | 20.1     | (14.5 - 26.0)  | 0.0002  |
| S2     | 80.1 | 85.2  | 5.2      | (-0.7 - 10.7)       | 0.1060  | 78.3 | 82.2   | 3.9      | (-2.9 - 10.3)  | 0.2666  |
| S3     | 80.1 | 90.0  | 10.0     | (6.2 - 13.7)        | 0.0002  | 75.4 | 88.3   | 12.9     | (8.5 - 17.0)   | 0.0002  |
| S4     | 91.1 | 93.8  | 2.7      | (-0.3 - 6.2)        | 0.1492  | 89.9 | 93.9   | 4.1      | (0.4 - 7.8)    | 0.0396  |
| S5     | 85.6 | 91.1  | 5.5      | (2.7 - 8.3)         | 0.0004  | 81.3 | 88.7   | 7.4      | (3.9 - 11.1)   | 0.0004  |
| S6     | 87.6 | 93.8  | 6.2      | (2.7 - 10.0)        | 0.0010  | 85.0 | 92.4   | 7.4      | (3.6 - 11.5)   | 0.0008  |
| S7     | 84.2 | 93.5  | 9.3      | (4.5 - 13.7)        | 0.0002  | 81.2 | 92.9   | 11.7     | (6.6 - 17.1)   | 0.0002  |
| S8     | 84.9 | 87.6  | 2.7      | (1.0 - 4.8)         | 0.0070  | 80.4 | 84.1   | 3.7      | (1.5 - 6.2)    | 0.0070  |
| S9     | 80.8 | 91.4  | 10.7     | (6.5 - 14.8)        | 0.0002  | 75.4 | 89.0   | 13.6     | (8.8 - 18.2)   | 0.0002  |
| S10    | 80.1 | 86.6  | 6.5      | (3.8 - 9.6)         | 0.0002  | 74.3 | 82.7   | 8.4      | (5.0 - 11.9)   | 0.0002  |
| S11    | 78.0 | 80.8  | 2.7      | (0.7 - 4.8)         | 0.0250  | 71.7 | 75.6   | 3.9      | (1.5 - 6.9)    | 0.0044  |
| G1     | 68.4 | 81.8  | 13.4     | (6.9 - 20.3)        | 0.0002  | 68.2 | 77.7   | 9.5      | (2.3 - 16.2)   | 0.0094  |
| G2     | 80.8 | 73.2  | -7.6     | (-12.7 - -2.1)      | 0.0080  | 77.7 | 70.9   | -6.8     | (-12.3 - -1.2) | 0.0174  |
| G3     | 81.4 | 88.7  | 7.2      | (3.4 - 11.0)        | 0.0014  | 77.8 | 85.7   | 7.8      | (3.6 - 12.3)   | 0.0014  |
| G4     | 76.3 | 82.8  | 6.5      | (1.4 - 11.7)        | 0.0212  | 73.4 | 84.4   | 11.1     | (6.1 - 16.2)   | 0.0002  |
| G5     | 75.3 | 89.0  | 13.7     | (9.3 - 18.2)        | 0.0002  | 68.9 | 85.9   | 17.0     | (11.8 - 22.0)  | 0.0002  |
| G6     | 76.6 | 88.7  | 12.0     | (7.2 - 16.8)        | 0.0002  | 75.7 | 88.7   | 13.0     | (8.3 - 17.9)   | 0.0002  |
| G7     | 84.9 | 87.6  | 2.7      | (0.3 - 5.2)         | 0.0742  | 81.5 | 85.0   | 3.5      | (0.8 - 6.4)    | 0.0282  |
| G8     | 81.8 | 92.1  | 10.3     | (5.8 - 14.8)        | 0.0002  | 77.6 | 91.1   | 13.5     | (8.3 - 18.7)   | 0.0002  |
| G9     | 83.2 | 91.4  | 8.2      | (3.8 - 12.7)        | 0.0008  | 80.5 | 91.8   | 11.3     | (6.4 - 16.3)   | 0.0002  |
| G10    | 80.1 | 83.8  | 3.8      | (0.3 - 7.2)         | 0.0664  | 76.0 | 80.9   | 4.9      | (1.0 - 9.1)    | 0.0294  |
| G11    | 79.0 | 89.7  | 10.7     | (6.2 - 15.5)        | 0.0002  | 72.7 | 87.4   | 14.7     | (9.6 - 20.1)   | 0.0002  |
| R1     | 67.0 | 94.8  | 27.8     | (22.3 - 33.3)       | 0.0002  | 60.5 | 94.0   | 33.5     | (28.0 - 38.9)  | 0.0002  |
| R2     | 82.8 | 88.0  | 5.2      | (1.0 - 9.3)         | 0.0270  | 81.6 | 85.1   | 3.5      | (-1.2 - 8.2)   | 0.1524  |
| R3     | 66.7 | 86.6  | 19.9     | (14.4 - 25.4)       | 0.0002  | 56.4 | 84.2   | 27.8     | (22.6 - 32.9)  | 0.0002  |
| R4     | 72.2 | 89.0  | 16.8     | (11.3 - 22.7)       | 0.0002  | 65.7 | 87.8   | 22.1     | (16.1 - 28.4)  | 0.0002  |
| R5     | 71.8 | 89.7  | 17.9     | (12.7 - 23.0)       | 0.0002  | 62.8 | 87.8   | 25.0     | (19.8 - 30.2)  | 0.0002  |
| R6     | 82.1 | 88.0  | 5.8      | (2.1 - 10.3)        | 0.0060  | 78.4 | 84.9   | 6.5      | (1.6 - 11.8)   | 0.0088  |
| R7     | 80.8 | 93.1  | 12.4     | (8.6 - 16.5)        | 0.0002  | 77.5 | 92.4   | 15.0     | (10.5 - 19.7)  | 0.0002  |
| R8     | 81.8 | 95.2  | 13.4     | (8.9 - 17.9)        | 0.0002  | 79.6 | 94.8   | 15.2     | (10.1 - 20.1)  | 0.0002  |
| R9     | 83.2 | 91.8  | 8.6      | (4.8 - 12.7)        | 0.0002  | 79.0 | 89.8   | 10.8     | (6.5 - 15.3)   | 0.0002  |
| R10    | 70.8 | 84.5  | 13.7     | (8.6 - 18.6)        | 0.0002  | 65.0 | 81.6   | 16.6     | (10.9 - 22.6)  | 0.0002  |
| R11    | 73.9 | 88.3  | 14.4     | (10.0 - 18.9)       | 0.0002  | 70.9 | 87.3   | 16.4     | (11.4 - 21.8)  | 0.0002  |
| Mean S | 82.3 | 89.3  | 7.1      | (5.4 - 8.7)         | 0.0002  | 78.2 | 87.0   | 8.8      | (7.1 - 10.5)   | 0.0002  |
| Mean G | 78.9 | 86.3  | 7.4      | (5.7 - 9.1)         | 0.0002  | 75.5 | 84.5   | 9.1      | (7.3 - 10.8)   | 0.0002  |
| Mean R | 75.7 | 89.9  | 14.2     | (11.9 - 16.6)       | 0.0002  | 70.7 | 88.2   | 17.5     | (15.2 - 19.7)  | 0.0002  |
| Mean   | 79.0 | 88.5  | 9.5      | (8.0 - 11.1)        | 0.0002  | 74.8 | 86.6   | 11.8     | (10.3 - 13.3)  | 0.0002  |

(b) Reader (noncontrast CT) vs. Reader+PANDA assistance (noncontrast CT) by the evaluation of accuracy and balanced accuracy for PDAC identification (PDAC vs. nonPDAC+normal).

**Supplementary Table 9:** The impact of PANDA assistance on reader performance on noncontrast CT by accuracy and balanced accuracy. Two-sided permutation tests were used to compute the statistical difference. S, pancreas specialist; G, general radiologist; R, radiology resident; Acc, accuracy; Acc-A, accuracy with PANDA assistance; BAcc, balanced accuracy; BAcc-A, balanced accuracy with PANDA assistance.

| Lesion detection |      |          |              |         |      |          |              |         |
|------------------|------|----------|--------------|---------|------|----------|--------------|---------|
| Reader           | Sens | $\Delta$ | 95% CI       | p-value | Spec | $\Delta$ | 95% CI       | p-value |
| PANDA            | 94.9 | -        | -            | -       | 100  | -        | -            | -       |
| S12              | 92.0 | 2.9      | (-1.7 - 7.4) | 0.3388  | 98.3 | 1.7      | (0.0 - 4.3)  | 0.5140  |
| S13              | 90.3 | 4.6      | (0.0 - 9.2)  | 0.1030  | 100  | 0.0      | (0.0 - 0.0)  | 1.0000  |
| S14              | 85.7 | 9.1      | (3.8 - 15.0) | 0.0004  | 99.1 | 0.9      | (0.0 - 2.7)  | 0.9960  |
| S15              | 92.6 | 2.3      | (-1.1 - 5.9) | 0.3506  | 100  | 0.0      | (0.0 - 0.0)  | 1.0000  |
| S16              | 92.0 | 2.9      | (-1.2 - 6.9) | 0.2620  | 98.3 | 1.7      | (0.0 - 4.8)  | 0.4938  |
| S17              | 95.4 | -0.6     | (-4.7 - 3.4) | 1.0000  | 98.3 | 1.7      | (0.0 - 4.6)  | 0.4916  |
| S18              | 92.0 | 2.9      | (-1.2 - 6.7) | 0.2686  | 100  | 0.0      | (0.0 - 0.0)  | 1.0000  |
| S19              | 91.4 | 3.4      | (-0.6 - 7.8) | 0.1516  | 99.1 | 0.9      | (0.0 - 3.2)  | 0.9982  |
| S20              | 95.4 | -0.6     | (-3.4 - 2.3) | 0.9832  | 97.4 | 2.6      | (0.0 - 5.8)  | 0.2630  |
| S21              | 85.7 | 9.1      | (4.2 - 14.9) | 0.0016  | 98.3 | 1.7      | (0.0 - 4.5)  | 0.4938  |
| S22              | 89.1 | 5.7      | (1.1 - 11.0) | 0.0438  | 98.3 | 1.7      | (0.0 - 4.5)  | 0.4986  |
| S23              | 93.1 | 1.7      | (-2.3 - 6.1) | 0.5740  | 96.6 | 3.4      | (0.8 - 7.1)  | 0.1194  |
| S24              | 91.4 | 3.4      | (-0.6 - 8.1) | 0.2032  | 96.6 | 3.4      | (0.8 - 6.9)  | 0.1204  |
| S25              | 96.0 | -1.1     | (-5.5 - 2.9) | 0.7820  | 88.8 | 11.2     | (5.6 - 17.5) | 0.0002  |
| S26              | 97.1 | -2.3     | (-6.2 - 1.2) | 0.3310  | 99.1 | 0.9      | (0.0 - 2.9)  | 0.9970  |
| Mean             | 92.0 | 2.9      | (0.1 - 5.8)  | 0.0874  | 97.9 | 2.1      | (1.4 - 3.0)  | 0.0002  |

(a) Reader (contrast-enhanced CT) vs. PANDA (noncontrast CT) by the evaluation of sensitivity and specificity for lesion detection (PDAC+nonPDAC vs. normal)

| PDAC identification |      |          |               |         |      |          |               |         |
|---------------------|------|----------|---------------|---------|------|----------|---------------|---------|
| Reader              | Sens | $\Delta$ | 95% CI        | p-value | Spec | $\Delta$ | 95% CI        | p-value |
| PANDA               | 92.6 | -        | -             | -       | 97.3 | -        | -             | -       |
| S12                 | 74.1 | 18.5     | (11.0 - 26.9) | 0.0002  | 98.4 | -1.1     | (-3.9 - 1.8)  | 0.7230  |
| S13                 | 79.6 | 13.0     | (4.6 - 22.0)  | 0.0076  | 98.9 | -1.6     | (-3.9 - 0.5)  | 0.3886  |
| S14                 | 74.1 | 18.5     | (10.5 - 27.0) | 0.0002  | 93.4 | 3.8      | (0.0 - 7.9)   | 0.1194  |
| S15                 | 83.3 | 9.3      | (2.7 - 17.0)  | 0.0236  | 99.5 | -2.2     | (-4.7 - 0.0)  | 0.2290  |
| S16                 | 76.9 | 15.7     | (8.5 - 23.7)  | 0.0004  | 95.6 | 1.6      | (-1.2 - 4.8)  | 0.5072  |
| S17                 | 69.4 | 23.1     | (14.8 - 31.0) | 0.0002  | 97.3 | 0.0      | (-3.2 - 3.2)  | 1.0000  |
| S18                 | 81.5 | 11.1     | (3.8 - 19.0)  | 0.0082  | 98.4 | -1.1     | (-3.6 - 1.6)  | 0.6952  |
| S19                 | 79.6 | 13.0     | (6.2 - 19.7)  | 0.0008  | 97.8 | -0.5     | (-3.2 - 2.2)  | 1.0000  |
| S20                 | 94.4 | -1.9     | (-7.3 - 4.3)  | 0.7450  | 92.3 | 4.9      | (1.1 - 8.9)   | 0.0400  |
| S21                 | 63.9 | 28.7     | (19.3 - 38.7) | 0.0002  | 100  | -2.7     | (-5.1 - -0.6) | 0.0696  |
| S22                 | 75.9 | 16.7     | (8.9 - 24.7)  | 0.0002  | 98.4 | -1.1     | (-3.6 - 1.2)  | 0.6912  |
| S23                 | 80.6 | 12.0     | (4.3 - 20.2)  | 0.0066  | 98.9 | -1.6     | (-4.0 - 0.5)  | 0.3750  |
| S24                 | 77.8 | 14.8     | (7.4 - 22.5)  | 0.0022  | 93.4 | 3.8      | (1.0 - 6.9)   | 0.0370  |
| S25                 | 88.9 | 3.7      | (-2.3 - 9.8)  | 0.3920  | 91.8 | 5.5      | (1.6 - 9.6)   | 0.0178  |
| S26                 | 93.5 | -0.9     | (-6.4 - 3.8)  | 1.0000  | 96.7 | 0.5      | (-2.7 - 3.7)  | 0.9960  |
| Mean                | 79.6 | 13.0     | (8.5 - 17.8)  | 0.0002  | 96.7 | 0.5      | (-0.7 - 1.9)  | 0.6772  |

(b) Reader(contrast-enhanced CT) vs. PANDA (noncontrast CT) by the evaluation of sensitivity and specificity for PDAC identification (PDAC vs. nonPDAC+normal).

**Supplementary Table 10:** Reader(contrast-enhanced CT) vs. PANDA (noncontrast CT) by sensitivity and specificity. Two-sided permutation tests were used to compute the statistical difference. S, pancreas specialist; Sens, sensitivity; Spec, specificity.

| Lesion detection |      |          |              |         |      |          |              |         |
|------------------|------|----------|--------------|---------|------|----------|--------------|---------|
| Reader           | Acc  | $\Delta$ | 95% CI       | p-value | BAcc | $\Delta$ | 95% CI       | p-value |
| PANDA            | 96.9 | -        | -            | -       | 97.4 | -        | -            | -       |
| S12              | 94.5 | 2.4      | (-0.3 - 5.2) | 0.1788  | 95.1 | 2.3      | (-0.2 - 4.8) | 0.1188  |
| S13              | 94.2 | 2.7      | (0.0 - 5.5)  | 0.1030  | 95.1 | 2.3      | (0.0 - 4.6)  | 0.1030  |
| S14              | 91.1 | 5.8      | (2.4 - 9.3)  | 0.0002  | 92.4 | 5.0      | (2.1 - 7.8)  | 0.0002  |
| S15              | 95.5 | 1.4      | (-0.7 - 3.4) | 0.3506  | 96.3 | 1.1      | (-0.6 - 2.9) | 0.3506  |
| S16              | 94.5 | 2.4      | (-0.0 - 5.2) | 0.1162  | 95.1 | 2.3      | (0.0 - 4.7)  | 0.0796  |
| S17              | 96.6 | 0.3      | (-2.4 - 3.1) | 1.0000  | 96.9 | 0.6      | (-1.7 - 2.9) | 0.6588  |
| S18              | 95.2 | 1.7      | (-0.7 - 4.1) | 0.2686  | 96.0 | 1.4      | (-0.6 - 3.4) | 0.2686  |
| S19              | 94.5 | 2.4      | (0.0 - 5.2)  | 0.0944  | 95.3 | 2.1      | (0.2 - 4.4)  | 0.0786  |
| S20              | 96.2 | 0.7      | (-1.4 - 2.7) | 0.7744  | 96.4 | 1.0      | (-0.8 - 3.2) | 0.3802  |
| S21              | 90.7 | 6.2      | (3.1 - 10.0) | 0.0004  | 92.0 | 5.4      | (2.6 - 8.6)  | 0.0004  |
| S22              | 92.8 | 4.1      | (1.0 - 7.2)  | 0.0174  | 93.7 | 3.7      | (1.0 - 6.5)  | 0.0124  |
| S23              | 94.5 | 2.4      | (-0.3 - 5.5) | 0.1516  | 94.8 | 2.6      | (0.0 - 5.3)  | 0.0632  |
| S24              | 93.5 | 3.4      | (0.3 - 6.5)  | 0.0410  | 94.0 | 3.4      | (0.7 - 6.2)  | 0.0180  |
| S25              | 93.1 | 3.8      | (0.3 - 7.2)  | 0.0576  | 92.4 | 5.0      | (1.3 - 8.4)  | 0.0082  |
| S26              | 97.9 | -1.0     | (-3.4 - 1.0) | 0.5404  | 98.1 | -0.7     | (-2.8 - 1.2) | 0.5404  |
| Mean             | 94.3 | 2.6      | (0.8 - 4.5)  | 0.0002  | 94.9 | 2.5      | (1.0 - 4.1)  | 0.0002  |

(a) Reader (contrast-enhanced CT) vs. PANDA (noncontrast CT) by the evaluation of accuracy and balanced accuracy for lesion detection (PDAC+non-PDAC vs. normal)

| PDAC identification |      |          |              |         |      |          |              |         |
|---------------------|------|----------|--------------|---------|------|----------|--------------|---------|
| Reader              | Acc  | $\Delta$ | 95% CI       | p-value | BAcc | $\Delta$ | 95% CI       | p-value |
| PANDA               | 95.5 | -        | -            | -       | 94.9 | -        | -            | -       |
| S12                 | 89.3 | 6.2      | (2.7 - 10.0) | 0.0018  | 86.2 | 8.7      | (4.8 - 13.1) | 0.0002  |
| S13                 | 91.8 | 3.8      | (0.0 - 7.6)  | 0.0608  | 89.3 | 5.7      | (0.9 - 10.4) | 0.0140  |
| S14                 | 86.3 | 9.3      | (5.2 - 13.4) | 0.0002  | 83.8 | 11.2     | (6.5 - 15.8) | 0.0002  |
| S15                 | 93.5 | 2.1      | (-0.7 - 5.2) | 0.2820  | 91.4 | 3.5      | (-0.1 - 7.5) | 0.0796  |
| S16                 | 88.7 | 6.9      | (3.4 - 10.7) | 0.0008  | 86.2 | 8.7      | (4.7 - 13.0) | 0.0002  |
| S17                 | 86.9 | 8.6      | (4.5 - 12.4) | 0.0001  | 83.4 | 11.6     | (7.0 - 15.9) | 0.0002  |
| S18                 | 92.1 | 3.4      | (0.3 - 6.9)  | 0.0624  | 89.9 | 5.0      | (1.1 - 9.3)  | 0.0140  |
| S19                 | 91.1 | 4.5      | (1.4 - 7.6)  | 0.0114  | 88.7 | 6.2      | (2.6 - 9.9)  | 0.0006  |
| S20                 | 93.1 | 2.4      | (-0.7 - 5.8) | 0.2382  | 93.4 | 1.5      | (-1.8 - 5.2) | 0.4212  |
| S21                 | 86.6 | 8.9      | (4.8 - 13.1) | 0.0002  | 81.9 | 13.0     | (8.1 - 18.0) | 0.0002  |
| S22                 | 90.0 | 5.5      | (2.4 - 8.9)  | 0.0030  | 87.1 | 7.8      | (3.9 - 11.9) | 0.0004  |
| S23                 | 92.1 | 3.4      | (0.0 - 6.9)  | 0.0766  | 89.7 | 5.2      | (1.2 - 9.4)  | 0.0202  |
| S24                 | 87.6 | 7.9      | (4.5 - 11.3) | 0.0002  | 85.6 | 9.3      | (5.1 - 13.3) | 0.0002  |
| S25                 | 90.7 | 4.8      | (1.7 - 8.2)  | 0.0104  | 90.3 | 4.6      | (1.1 - 8.3)  | 0.0156  |
| S26                 | 95.5 | 0.0      | (-2.7 - 2.7) | 1.0000  | 95.1 | -0.2     | (-3.3 - 3.0) | 0.9866  |
| Mean                | 90.4 | 5.2      | (3.1 - 7.3)  | 0.0002  | 88.1 | 6.8      | (4.4 - 9.2)  | 0.0002  |

(b) Reader (contrast-enhanced CT) vs. PANDA (noncontrast CT) by the evaluation of accuracy and balanced accuracy for PDAC identification (PDAC vs. nonPDAC + normal).

**Supplementary Table 11:** Reader (contrast-enhanced CT) vs. PANDA (noncontrast CT) by accuracy and balanced accuracy. Two-sided permutation tests were used to compute the statistical difference. S, pancreas specialist; acc, accuracy; bal. acc, balanced accuracy.

| Site                 | A (SHCMU) | B (FAHZU) | C (XH) | D (FUSCC) |
|----------------------|-----------|-----------|--------|-----------|
| Patients             | 1274      | 1506      | 176    | 254       |
| Accuracy(%)          | 81.3      | 79.2      | 73.9   | 79.9      |
| Balanced accuracy(%) | 46.7      | 55.8      | 45.7   | 60.8      |

**Supplementary Table 12:** Differential diagnosis results on four external centers with pathologically confirmed PDAC and nonPDAC.

|                             | AUC   | CI          | Sensitivity (%)<br>(Main or mixed-duct<br>IPMN) | CI        | Specificity (%)<br>(Branch-duct<br>IPMN) | CI        |
|-----------------------------|-------|-------------|-------------------------------------------------|-----------|------------------------------------------|-----------|
| Internal All<br>(n=87)      | 0.944 | 0.894-0.982 | 94.1                                            | 87.2-100  | 80.6                                     | 66.7-93.1 |
| Internal Correct<br>(n=71)  | 0.948 | 0.892-0.988 | 95.5                                            | 88.9-100  | 77.8                                     | 60.6-92.3 |
| External All<br>(n=172)     | 0.915 | 0.867-0.958 | 89.0                                            | 81.6-95.2 | 81.1                                     | 73.0-89.5 |
| External Correct<br>(n=139) | 0.947 | 0.908-0.979 | 94.1                                            | 88.3-98.7 | 80.3                                     | 70.7-88.9 |

**Supplementary Table 13:** Results for IPMN subtype classification. We report two sets of results separately on the both internal differential diagnosis cohort and external multicenter cohort, i.e., AUC, sensitivity, and specificity on all collected IPMN (denoted as “All”), and on those correctly classified by PANDA Stage-3 (denoted as “Correct”), respectively.

| False positive type                          | RW1<br>(number of cases) | RW2<br>(number of cases) | Category                         |
|----------------------------------------------|--------------------------|--------------------------|----------------------------------|
| Pancreatic fatty infiltration <sup>[7]</sup> | 33                       | 0                        | Easy to rule out by radiologists |
| Stomach/bowel contents                       | 31                       | 2                        |                                  |
| Heart                                        | 6                        | 0                        |                                  |
| Motion artifacts                             | 0                        | 2                        |                                  |
| Abdominal structure                          | 2                        | 0                        | Requires time or follow-up       |
| Low-density area without<br>clinical meaning | 4                        | 0                        |                                  |

**Supplementary Table 14:** Analysis of PANDA’s false positive predictions in real-world evaluation RW1 and RW2. The low-density area without clinical meaning is diagnosed by MDT and confirmed by follow-up.

## References

- [1] Tanaka, M., Fernández-del Castillo, C., Kamisawa, T., Jang, J.Y., Levy, P., Ohtsuka, T., Salvia, R., Shimizu, Y., Tada, M., Wolfgang, C.L.: Revisions of international consensus fukuoka guidelines for the management of IPMN of the pancreas. *Pancreatology* **17**(5), 738–753 (2017)
- [2] Heinrich, M.P., Jenkinson, M., Brady, M., Schnabel, J.A.: MRF-based deformable registration and ventilation estimation of lung CT. *IEEE Transactions on Medical Imaging* **32**(7), 1239–1248 (2013)
- [3] Yushkevich, P.A., Piven, J., Hazlett, H.C., Smith, R.G., Ho, S., Gee, J.C., Gerig, G.: User-guided 3D active contour segmentation of anatomical structures: significantly improved efficiency and reliability. *Neuroimage* **31**(3), 1116–1128 (2006)
- [4] Yao, J., Cao, K., Hou, Y., Zhou, J., Xia, Y., Nogues, I., Song, Q., Jiang, H., Ye, X., Lu, J., *et al.*: Deep learning for fully automated prediction of overall survival in patients undergoing resection for pancreatic cancer: a retrospective multicenter study. *Annals of Surgery* **278**(1), 68–79 (2023)
- [5] Sahani, D.V., Kadavigere, R., Blake, M., Fernandez-del Castillo, C., Lauwers, G.Y., Hahn, P.F.: Intraductal papillary mucinous neoplasm of pancreas: multi-detector row ct with 2d curved reformations—correlation with mrCP. *Radiology* **238**(2), 560–569 (2006)
- [6] Goggins, M., Overbeek, K.A., Brand, R., Syngal, S., Del Chiaro, M., Bartsch, D.K., Bassi, C., Carrato, A., Farrell, J., Fishman, E.K., *et al.*: Management of patients with increased risk for familial pancreatic cancer: updated recommendations from the international cancer of the pancreas screening (caps) consortium. *Gut* **69**(1), 7–17 (2020)
- [7] Kawamoto, S., Siegelman, S.S., Bluemke, D.A., Hruban, R.H., Fishman, E.K.: Focal fatty infiltration in the head of the pancreas: evaluation with multidetector computed tomography with multiplanar reformation imaging. *Journal of Computer Assisted Tomography* **33**(1), 90–95 (2009)
